# Supplementary material for: Convenient synthesis of benzo[4,5]thiazolo[2,3-c][1,2,4]triazoles with 1 mol% CuCl2·2H2O as catalyst in water
Source: Royal Society of Chemistry journal article supplement (doi:10.1039/c4gc02156h), 2014-12-02
Supplement: c4gc02156h1.pdf [file c4gc02156h1.pdf]

# Supporting information

## Convenient Synthesis of Benzo[4,5]thiazolo [2,3-*c*][1,2,4]triazoles with 1 mol% CuCl<sub>2</sub>•2H<sub>2</sub>O as Catalyst in Water

Li-Rong Wen,\* Shou-Lei Li, Jian Zhang, and Ming Li\*

State Key Laboratory Base of Eco-Chemical Engineering, College of Chemistry and Molecular  
Engineering, Qingdao University of Science and Technology, Qingdao 266042, P. R. China

### Contents

|                                                                    |    |
|--------------------------------------------------------------------|----|
| Characterization data.....                                         | 2  |
| References.....                                                    | 12 |
| <sup>1</sup> H and <sup>13</sup> C NMR spectra of compounds 4..... | 13 |

## Characterization Data

### 3-Phenylbenzo[4,5]thiazolo[2,3-*c*][1,2,4]triazole (4a)<sup>1</sup>

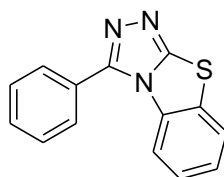

4a

Yellow powder; Mp 145-146 °C; **IR** (KBr) *v*: 3074, 1636, 1579, 1483, 773, 755, 704  $\text{cm}^{-1}$ ; **<sup>1</sup>H NMR** (DMSO-*d*<sub>6</sub>, 500 MHz):  $\delta$  = 8.09 (dd, *J* = 1.2, 8.0 Hz, 1H, ArH), 7.85–7.83 (m, 2H, ArH), 7.67–7.66 (m, 3H, ArH), 7.48–7.41 (m, 3H, ArH); **<sup>13</sup>C NMR** (DMSO-*d*<sub>6</sub>, 125 MHz):  $\delta$  = 132.3, 131.2, 130.2, 129.7, 129.6, 127.3, 126.9, 126.3, 114.4; **HRMS** (ESI-TOF<sup>+</sup>): *m/z* calcd for C<sub>14</sub>H<sub>10</sub>N<sub>3</sub>S [(M + H)<sup>+</sup>], 252.0595; found, 252.0592.

### 3-(4-Chlorophenyl)benzo[4,5]thiazolo[2,3-*c*][1,2,4]triazole (4b)

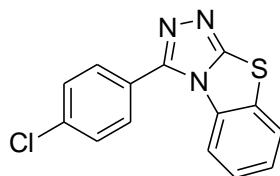

4b

Cyan powder; Mp 198-199 °C; **IR** (KBr) *v*: 3092, 3074, 1632, 1603, 1484, 843, 762  $\text{cm}^{-1}$ ; **<sup>1</sup>H NMR** (DMSO-*d*<sub>6</sub>, 500 MHz):  $\delta$  = 8.09 (d, *J* = 7.5 Hz, 1H, ArH), 7.89 (d, *J* = 8.4 Hz, 2H, ArH), 7.74 (d, *J* = 8.5 Hz, 2H, ArH), 7.51–7.42 (m, 3H, ArH); **<sup>13</sup>C NMR** (DMSO-*d*<sub>6</sub>, 125 MHz):  $\delta$  = 136.0, 132.2, 131.6, 130.2, 129.7, 127.4, 126.9, 126.2, 114.6; **HRMS** (ESI-TOF<sup>+</sup>): *m/z* calcd for C<sub>14</sub>H<sub>9</sub>ClN<sub>3</sub>S [(M + H)<sup>+</sup>], 286.0206; found, 286.0210.

### 3-(4-Bromophenyl)benzo[4,5]thiazolo[2,3-*c*][1,2,4]triazole (4c)

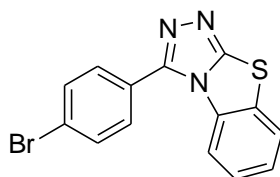

4c

Yellow powder; Mp 198-200 °C; **IR** (KBr) *v*: 3089, 3072, 1629, 1599, 1483, 830, 762

cm<sup>-1</sup>; **<sup>1</sup>H NMR** (DMSO-*d*<sub>6</sub>, 500 MHz):  $\delta$  = 8.09 (d, *J* = 7.3 Hz, 1H, ArH), 7.87 (d, *J* = 8.4 Hz, 2H, ArH), 7.80 (d, *J* = 8.4 Hz, 2H, ArH), 7.51–7.42 (m, 3H, ArH); **<sup>13</sup>C NMR** (DMSO-*d*<sub>6</sub>, 125 MHz):  $\delta$  = 132.6, 132.2, 131.7, 130.2, 127.4, 126.9, 126.6, 126.2, 124.8, 114.6; **HRMS** (ESI-TOF<sup>+</sup>): *m/z* calcd for C<sub>14</sub>H<sub>9</sub>BrN<sub>3</sub>S [(M + H)<sup>+</sup>], 329.9701; found, 329.9709.

### 3-(4-Fluorophenyl)benzo[4,5]thiazolo[2,3-*c*][1,2,4]triazole (4d)

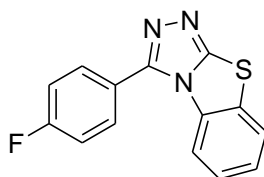

4d

Gray powder; Mp 168-169 °C; **IR** (KBr) *v*: 3069, 1609, 1486, 840, 765 cm<sup>-1</sup>; **<sup>1</sup>H NMR** (CDCl<sub>3</sub>, 500 MHz):  $\delta$  = 7.80–7.78 (m, 2H, ArH), 7.71 (d, *J* = 8.0 Hz, 1H, ArH), 7.48 (d, *J* = 8.1 Hz, 1H, ArH), 7.41 (t, *J* = 7.5 Hz, 1H, ArH), 7.36–7.29 (m, 3H, ArH); **<sup>13</sup>C NMR** (CDCl<sub>3</sub>, 125 MHz):  $\delta$  = 164.2 (<sup>1</sup>*J*<sub>C-F</sub> = 247.6 Hz), 132.6, 131.3 (<sup>3</sup>*J*<sub>C-F</sub> = 6.6 Hz), 129.9, 126.4, 124.9, 123.1, 116.4 (<sup>2</sup>*J*<sub>C-F</sub> = 21.7 Hz), 114.1; **HRMS** (ESI-TOF<sup>+</sup>): *m/z* calcd for C<sub>14</sub>H<sub>9</sub>N<sub>3</sub>OSF [(M + H)<sup>+</sup>], 270.0501; found, 270.0512.

### 4-(Benzo[4,5]thiazolo[2,3-*c*][1,2,4]triazol-3-yl)phenol (4e)

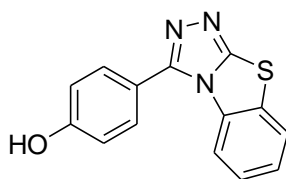

4e

Gray powder; Mp 275-276 °C; **IR** (KBr) *v*: 3056, 3013, 1613, 1589, 1494, 840, 750 cm<sup>-1</sup>; **<sup>1</sup>H NMR** (DMSO-*d*<sub>6</sub>, 500 MHz):  $\delta$  = 10.15 (s, 1H, OH), 8.06 (t, *J* = 4.5 Hz, 1H, ArH), 7.62 (d, *J* = 8.2 Hz, 2H, ArH), 7.46–7.43 (m, 3H, ArH), 7.02–7.00 (d, *J* = 8.3 Hz, 2H, ArH); **<sup>13</sup>C NMR** (DMSO-*d*<sub>6</sub>, 125 MHz):  $\delta$  = 160.1, 131.3, 130.3, 127.3, 126.8, 126.2, 116.3, 114.4, 102.7; **HRMS** (ESI-TOF<sup>+</sup>): *m/z* calcd for C<sub>14</sub>H<sub>10</sub>N<sub>3</sub>OS [(M + H)<sup>+</sup>], 268.0545; found, 268.0549.

### 3-(*p*-Tolyl)benzo[4,5]thiazolo[2,3-*c*][1,2,4]triazole (4f)<sup>1</sup>

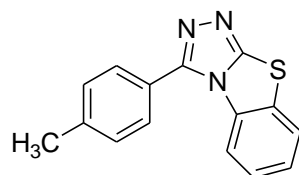

4f

Brown powder; Mp 155-156 °C; **IR** (KBr)  $\nu$ : 3066, 3031, 2919, 2850, 1609, 1579, 1486, 820, 748  $\text{cm}^{-1}$ ;  **$^1\text{H NMR}$**  (DMSO- $d_6$ , 500 MHz):  $\delta$  = 8.07 (d,  $J$  = 7.9 Hz, 1H, ArH), 7.72 (d,  $J$  = 7.7 Hz, 2H, ArH), 7.47 (d,  $J$  = 7.7 Hz, 3H, ArH), 7.45–7.41 (m, 2H, ArH), 2.46 (s, 3H, CH<sub>3</sub>);  **$^{13}\text{C NMR}$**  (DMSO- $d_6$ , 125 MHz):  $\delta$  = 141.0, 132.3, 130.1, 129.6, 127.3, 126.9, 126.3, 124.5, 114.5, 21.6; **HRMS** (ESI-TOF<sup>+</sup>):  $m/z$  calcd for C<sub>15</sub>H<sub>12</sub>N<sub>3</sub>S [(M + H)<sup>+</sup>], 266.0752; found, 266.0759.

### 3-(4-Methoxyphenyl)benzo[4,5]thiazolo[2,3-c][1,2,4]triazole (4g)<sup>1</sup>

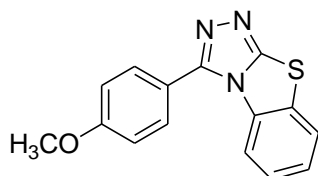

4g

Cyan powder; Mp 141-142 °C; **IR** (KBr)  $\nu$ : 3088, 3056, 2999, 2922, 2841, 1614, 1575, 1483, 846, 747  $\text{cm}^{-1}$ ;  **$^1\text{H NMR}$**  (CDCl<sub>3</sub>, 500 MHz):  $\delta$  = 7.72–7.69 (m, 3H, ArH), 7.54 (d,  $J$  = 8.1 Hz, 1H, ArH), 7.39 (t,  $J$  = 7.5 Hz, 1H, ArH), 7.33 (t,  $J$  = 7.7 Hz, 1H, ArH), 7.11 (d,  $J$  = 8.5 Hz, 2H, ArH), 3.93 (s, 3H, OCH<sub>3</sub>);  **$^{13}\text{C NMR}$**  (CDCl<sub>3</sub>, 125 MHz):  $\delta$  = 161.5, 132.7, 130.7, 130.3, 126.2, 124.8, 119.1, 114.5, 114.3, 55.5; **HRMS** (ESI-TOF<sup>+</sup>):  $m/z$  calcd for C<sub>15</sub>H<sub>12</sub>ON<sub>3</sub>S [(M + H)<sup>+</sup>], 282.0701; found, 282.0709.

### 3-(3-Chlorophenyl)benzo[4,5]thiazolo[2,3-c][1,2,4]triazole (4h)

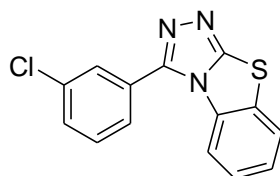

4h

Pink powder; Mp 168-169 °C; **IR** (KBr)  $\nu$ : 3053, 3009, 1626, 1569, 1482, 775, 755, 708  $\text{cm}^{-1}$ ;  **$^1\text{H NMR}$**  (CDCl<sub>3</sub>, 500 MHz):  $\delta$  = 7.83 (s, 1H, ArH), 7.74–7.69 (m, 2H, ArH),

7.62–7.59 (m, 1H, ArH), 7.57 (d,  $J = 7.7$ , Hz, 1H, ArH), 7.54 (d,  $J = 7.9$ , Hz, 1H, ArH), 7.45–7.36 (m, 2H, ArH);  $^{13}\text{C NMR}$  ( $\text{CDCl}_3$ , 125 MHz):  $\delta = 156.6, 148.0, 135.2, 132.6, 130.9, 130.3, 129.8, 129.2, 128.6, 127.2, 126.6, 124.9, 114.2$ ; **HRMS** (ESI-TOF<sup>+</sup>):  $m/z$  calcd for  $\text{C}_{14}\text{H}_9\text{N}_3\text{SCl}$  [(M + H)<sup>+</sup>], 286.0206; found, 286.0213.

### 3-(3-(Trifluoromethyl)phenyl)benzo[4,5]thiazolo[2,3-*c*][1,2,4]triazole (4i)

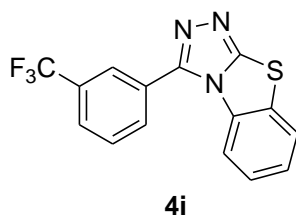

Gray powder; Mp 174–175 °C; **IR** (KBr)  $\nu$ : 3083, 3046, 1622, 1581, 1482, 808, 747, 704  $\text{cm}^{-1}$ ;  $^1\text{H NMR}$  ( $\text{CDCl}_3$ , 500 MHz):  $\delta = 8.11$  (s, 1H, ArH), 8.03 (d,  $J = 7.5$  Hz, 1H, ArH), 7.89 (d,  $J = 7.8$  Hz, 1H, ArH), 7.79–7.74 (m, 2H, ArH), 7.48–7.43 (m, 2H, ArH), 7.39 (t,  $J = 7.7$  Hz, 1H, ArH);  $^{13}\text{C NMR}$  ( $\text{CDCl}_3$ , 125 MHz):  $\delta = 132.8, 132.3, 131.7$  ( $^2J_{\text{C-F}} = 33.2$  Hz), 130.0, 129.7, 128.2, 127.4, 126.6, 126.5, 126.1, 125.0, 123.5 ( $^1J_{\text{C-F}} = 271.3$  Hz), 114.1; **HRMS** (ESI-TOF<sup>+</sup>):  $m/z$  calcd for  $\text{C}_{15}\text{H}_9\text{N}_3\text{SF}_3$  [(M + H)<sup>+</sup>], 320.0469; found, 320.0473.

### 3-(3-Nitrophenyl)benzo[4,5]thiazolo[2,3-*c*][1,2,4]triazole (4j)

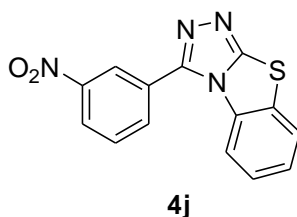

Gray powder; Mp 237–238 °C; **IR** (KBr)  $\nu$ : 3097, 1624, 1579, 1483, 813, 754, 681  $\text{cm}^{-1}$ ;  $^1\text{H NMR}$  ( $\text{CDCl}_3$ , 500 MHz):  $\delta = 8.72$  (s, 1H, ArH), 8.49 (d,  $J = 7.5$  Hz, 1H, ArH), 8.20 (d,  $J = 7.0$  Hz, 1H, ArH), 7.85 (t,  $J = 7.6$  Hz, 1H, ArH), 7.77 (d,  $J = 7.6$  Hz, 1H, ArH), 7.51–7.40 (m, 3H, ArH);  $^{13}\text{C NMR}$  ( $\text{CDCl}_3$ , 125 MHz):  $\delta = 148.5, 134.8, 132.7, 130.4, 129.7, 128.9, 126.8, 126.7, 125.3, 125.2, 123.9, 113.9$ ; **HRMS** (ESI-TOF<sup>+</sup>):  $m/z$  calcd for  $\text{C}_{14}\text{H}_9\text{N}_4\text{O}_2\text{S}$  [(M + H)<sup>+</sup>], 297.0446; found, 297.0459.

### 3-(2-Bromophenyl)benzo[4,5]thiazolo[2,3-*c*][1,2,4]triazole (4k)

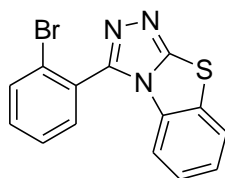

**4k**

Brown powder; Mp 145-146 °C; **IR** (KBr)  $\nu$ : 3059, 1636, 1600, 1483, 770, 761, 682  $\text{cm}^{-1}$ ;  **$^1\text{H}$  NMR** ( $\text{CDCl}_3$ , 500 MHz):  $\delta$  = 7.82 (d,  $J$  = 7.7 Hz, 1H, ArH), 7.71 (d,  $J$  = 8.0 Hz, 1H, ArH), 7.66 (d,  $J$  = 2.8 Hz, 1H, ArH), 7.57–7.51 (m, 2H, ArH), 7.39 (t,  $J$  = 7.6 Hz, 1H, ArH), 7.31 (t,  $J$  = 7.7 Hz, 1H, ArH), 7.03 (d,  $J$  = 8.2 Hz, 1H, ArH);  **$^{13}\text{C}$  NMR** ( $\text{CDCl}_3$ , 125 MHz):  $\delta$  = 133.3, 132.8, 132.5, 129.7, 128.8, 127.9, 126.5, 126.4, 124.6, 124.3, 114.4; **HRMS** (ESI-TOF<sup>+</sup>):  $m/z$  calcd for  $\text{C}_{14}\text{H}_9\text{N}_3\text{BrS}$  [(M + H)<sup>+</sup>], 329.9701; found, 329.9710.

**3-(3,5-Dimethylphenyl)benzo[4,5]thiazolo[2,3-c][1,2,4]triazole (4l)**

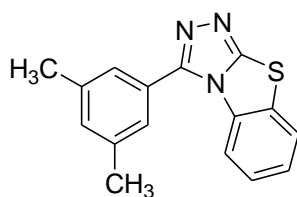

**4l**

White powder; Mp 186-187 °C; **IR** (KBr)  $\nu$ : 3052, 3006, 2917, 2850, 1602, 1483, 752, 720, 683  $\text{cm}^{-1}$ ;  **$^1\text{H}$  NMR** ( $\text{CDCl}_3$ , 500 MHz):  $\delta$  = 7.70 (d,  $J$  = 7.9 Hz, 1H, ArH), 7.56 (d,  $J$  = 8.0 Hz, 1H, ArH), 7.41–7.32 (m, 4H, ArH), 7.24 (s, 1H, ArH), 2.44 (s, 6H,  $\text{CH}_3$ );  **$^{13}\text{C}$  NMR** ( $\text{CDCl}_3$ , 125 MHz):  $\delta$  = 156.1, 149.7, 138.8, 132.7, 130.1, 126.8, 126.6, 126.3, 126.2, 124.7, 114.3, 40.9, 21.3; **HRMS** (ESI-TOF<sup>+</sup>):  $m/z$  calcd for  $\text{C}_{16}\text{H}_{14}\text{N}_3\text{S}$  [(M + H)<sup>+</sup>], 280.0908; found, 280.0913.

**3-Benzylbenzo[4,5]thiazolo[2,3-c][1,2,4]triazole (4m)**

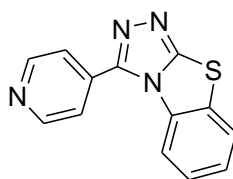

**4m**

Brown powder; Mp 145-147 °C; **IR** (KBr)  $\nu$ : 3059, 1632, 1600, 1489, 748, 727, 681  $\text{cm}^{-1}$ ;  **$^1\text{H NMR}$**  ( $\text{CDCl}_3$ , 500 MHz):  $\delta$  = 8.90 (d,  $J$  = 4.3 Hz, 2H, ArH), 7.76–7.74 (m, 3H, ArH), 7.61 (d,  $J$  = 8.1 Hz, 1H, ArH), 7.46 (t,  $J$  = 7.7 Hz, 1H, ArH), 7.41 (t,  $J$  = 7.7 Hz, 1H, ArH);  **$^{13}\text{C NMR}$**  ( $\text{CDCl}_3$ , 125 MHz):  $\delta$  = 150.7, 134.7, 132.6, 129.6, 126.9, 126.7, 125.2, 123.4, 122.9, 114.3; **HRMS** (ESI-TOF<sup>+</sup>):  $m/z$  calcd for  $\text{C}_{13}\text{H}_8\text{N}_4\text{S}$  [(M + H)<sup>+</sup>], 253.0571; found, 253.0562.

### 7-Fluoro-3-phenylbenzo[4,5]thiazolo[2,3-*c*][1,2,4]triazole (4n)

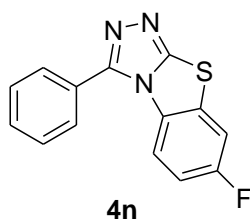

White powder; Mp 181-182 °C; **IR** (KBr)  $\nu$ : 3076, 1626, 1589, 1490, 799, 767, 699  $\text{cm}^{-1}$ ;  **$^1\text{H NMR}$**  ( $\text{CDCl}_3$ , 500 MHz):  $\delta$  = 7.79–7.76 (m, 2H, ArH), 7.65–7.59 (m, 3H, ArH), 7.50 (dd,  $J$  = 4.4, 9.1 Hz, 1H, ArH), 7.44 (dd,  $J$  = 2.6, 7.7 Hz, 1H, ArH), 7.07–7.03 (m, 1H, ArH);  **$^{13}\text{C NMR}$**  ( $\text{CDCl}_3$ , 125 MHz):  $\delta$  = 160.3 ( $^1J_{\text{C-F}}$  = 248.6 Hz), 159.3, 134.3 ( $^3J_{\text{C-F}}$  = 10.0 Hz), 129.2, 129.1, 127.9, 127.8, 127.6, 126.6, 115.3 ( $^3J_{\text{C-F}}$  = 8.9 Hz), 114.1 ( $^2J_{\text{C-F}}$  = 24.3 Hz), 111.9 ( $^2J_{\text{C-F}}$  = 27.1 Hz); **HRMS** (ESI-TOF<sup>+</sup>):  $m/z$  calcd for  $\text{C}_{14}\text{H}_9\text{N}_3\text{SF}$  [(M + H)<sup>+</sup>], 270.0501; found, 270.0512.

### 3-(4-Chlorophenyl)-7-fluorobenzo[4,5]thiazolo[2,3-*c*][1,2,4]triazole (4o)

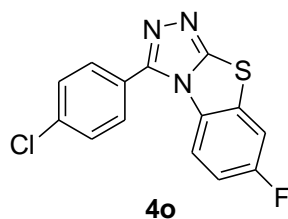

Gray powder; Mp 264-265 °C; **IR** (KBr)  $\nu$ : 3099, 3075, 1636, 1601, 1487, 853, 824, 719  $\text{cm}^{-1}$ ;  **$^1\text{H NMR}$**  ( $\text{CDCl}_3$ , 500 MHz):  $\delta$  = 7.73 (d,  $J$  = 8.2 Hz, 2H, ArH), 7.60 (d,  $J$  = 8.2 Hz, 2H, ArH), 7.49–7.44 (m, 2H, ArH), 7.10–7.07 (m, 1H, ArH);  **$^{13}\text{C NMR}$**  ( $\text{CDCl}_3$ , 125 MHz):  $\delta$  = 160.3 ( $^1J_{\text{C-F}}$  = 248.6 Hz), 137.2, 134.3 ( $^3J_{\text{C-F}}$  = 10.0 Hz), 130.3, 129.6, 126.4, 125.1, 115.1 ( $^3J_{\text{C-F}}$  = 8.9 Hz), 114.2 ( $^2J_{\text{C-F}}$  = 24.5 Hz), 112.1 ( $^2J_{\text{C-F}}$  = 27.0 Hz), 111.9; **HRMS** (ESI-TOF<sup>+</sup>):  $m/z$  calcd for  $\text{C}_{14}\text{H}_8\text{N}_3\text{ClFS}$  [(M + H)<sup>+</sup>], 304.0112;

found, 304.0119.

#### 7-Fluoro-3-(*p*-tolyl)benzo[4,5]thiazolo[2,3-*c*][1,2,4]triazole (4p)

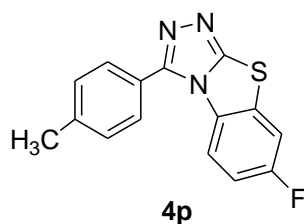

Pink powder; Mp 216-217 °C; **IR** (KBr)  $\nu$ : 3073, 3029, 2920, 2851, 1636, 1585, 1491, 842, 825, 720  $\text{cm}^{-1}$ ;  **$^1\text{H NMR}$**  ( $\text{CDCl}_3$ , 500 MHz):  $\delta$  = 7.67 (d,  $J$  = 8.0 Hz, 2H, ArH), 7.51 (dd,  $J$  = 4.4, 9.1 Hz, 1H, ArH), 7.44–7.41 (m, 3H, ArH), 7.07–7.03 (m, 1H, ArH), 2.50 (s, 3H,  $\text{CH}_3$ );  **$^{13}\text{C NMR}$**  ( $\text{CDCl}_3$ , 125 MHz):  $\delta$  = 160.2 ( $^1J_{\text{C-F}}$  = 248.2 Hz), 156.0, 149.4, 141.2, 134.3 ( $^3J_{\text{C-F}}$  = 10.0 Hz), 129.9, 128.9, 126.6, 123.6, 115.3 ( $^3J_{\text{C-F}}$  = 8.7 Hz), 114.0 ( $^2J_{\text{C-F}}$  = 24.0 Hz), 111.9 ( $^2J_{\text{C-F}}$  = 27.2 Hz); **HRMS** (ESI-TOF<sup>+</sup>):  $m/z$  calcd for  $\text{C}_{15}\text{H}_{11}\text{N}_3\text{FS}$  [(M + H)<sup>+</sup>], 284.0658; found, 284.0649.

#### 7-Chloro-3-phenylbenzo[4,5]thiazolo[2,3-*c*][1,2,4]triazole (4q)

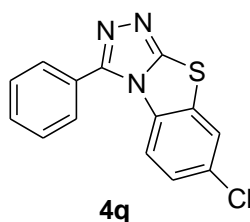

White powder; Mp 209-211 °C; **IR** (KBr)  $\nu$ : 3083, 3072, 2992, 2851, 1716, 1528, 1481, 1466, 1447, 854, 792, 769, 717, 698, 623  $\text{cm}^{-1}$ ;  **$^1\text{H NMR}$**  ( $\text{CDCl}_3$ , 500 MHz):  $\delta$  = 7.79-7.77 (m, 2H, ArH), 7.70 (d,  $J$  = 2.0 Hz, 1H, ArH), 7.64-7.59 (m, 3H, ArH), 7.47 (d,  $J$  = 8.9 Hz, 1H, ArH), 7.30 (dd,  $J$  = 2.0, 8.8 Hz, 1H, ArH);  **$^{13}\text{C NMR}$**  ( $\text{CDCl}_3$ , 125 MHz):  $\delta$  = 134.2, 132.1, 131.0, 129.1, 128.6, 126.8, 126.6, 115.0; **HRMS** (ESI-TOF<sup>+</sup>):  $m/z$  calcd for  $\text{C}_{14}\text{H}_9\text{N}_3\text{SCl}$  [(M + H)<sup>+</sup>], 286.0206; found, 286.0215.

#### 7-Chloro-3-(4-chlorophenyl)benzo[4,5]thiazolo[2,3-*c*][1,2,4]triazole (4r)



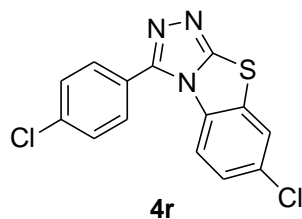

Brown powder; Mp 270-271 °C; **IR** (KBr)  $\nu$ : 3092, 3069, 1735, 1519, 1484, 845, 824, 799, 743  $\text{cm}^{-1}$ ; **<sup>1</sup>H NMR** (DMSO-*d*<sub>6</sub>, 500 MHz):  $\delta$  = 8.25 (s, 1H, ArH), 7.85 (d,  $J$  = 8.2 Hz, 2H, ArH), 7.72 (d,  $J$  = 8.3 Hz, 2H, ArH), 7.49 (d,  $J$  = 8.8 Hz, 1H, ArH), 7.38 (d,  $J$  = 8.8 Hz, 1H, ArH); **<sup>13</sup>C NMR** (CDCl<sub>3</sub>, 125 MHz):  $\delta$  = 137.3, 134.2, 132.3, 130.3, 129.6, 128.4, 126.9, 125.1, 124.7, 114.8; **HRMS** (ESI-TOF<sup>+</sup>):  $m/z$  calcd for C<sub>14</sub>H<sub>8</sub>N<sub>3</sub>SCl<sub>2</sub> [(M + H)<sup>+</sup>], 319.9816; found, 319.9812.

#### 7-Chloro-3-(p-tolyl)benzo[4,5]thiazolo[2,3-c][1,2,4]triazole (4s)

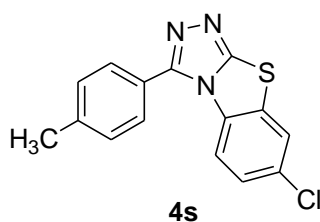

Gray powder; Mp 230-231 °C; **IR** (KBr)  $\nu$ : 3093, 3054, 2923, 2853, 1540, 1486, 856, 829, 816, 794  $\text{cm}^{-1}$ ; **<sup>1</sup>H NMR** (CDCl<sub>3</sub>, 500 MHz):  $\delta$  = 7.68 (d,  $J$  = 1.8 Hz, 1H, ArH), 7.65 (d,  $J$  = 8.0 Hz, 2H, ArH), 7.46 (d,  $J$  = 8.9 Hz, 1H, ArH), 7.40 (d,  $J$  = 7.8 Hz, 2H, ArH), 7.28 (dd,  $J$  = 1.9, 8.7 Hz, 1H, ArH), 2.49 (s, 3H, CH<sub>3</sub>); **<sup>13</sup>C NMR** (CDCl<sub>3</sub>, 125 MHz):  $\delta$  = 149.7, 141.3, 134.2, 131.9, 129.8, 128.9, 128.7, 126.7, 124.5, 123.6, 115.0, 21.5; **HRMS** (ESI-TOF<sup>+</sup>):  $m/z$  calcd for C<sub>15</sub>H<sub>11</sub>N<sub>3</sub>SCl [(M + H)<sup>+</sup>], 300.0362; found, 300.0356.

#### 7-Bromo-3-phenylbenzo[4,5]thiazolo[2,3-c][1,2,4]triazole (4t)

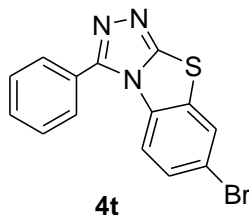

White powder; Mp 224-225 °C; **IR** (KBr)  $\nu$ : 3090, 1526, 1480, 828, 765, 716, 698, 622

cm<sup>-1</sup>; **<sup>1</sup>H NMR** (CDCl<sub>3</sub>, 500 MHz):  $\delta$  = 7.85 (d,  $J$  = 8.0 Hz, 2H, ArH), 7.78-7.76 (m, 2H, ArH), 7.62-7.60 (m, 3H, ArH), 7.45 (dd,  $J$  = 1.4, 8.8 Hz, 1H, ArH), 7.39 (d,  $J$  = 8.8 Hz, 1H, ArH); **<sup>13</sup>C NMR** (CDCl<sub>3</sub>, 125 MHz):  $\delta$  = 134.7, 131.0, 129.7, 129.2, 127.3, 126.9, 119.3, 115.5; **HRMS** (ESI-TOF<sup>+</sup>):  $m/z$  calcd for C<sub>14</sub>H<sub>9</sub>N<sub>3</sub>SBr [(M + H)<sup>+</sup>], 329.9701; found, 329.9715.

**7-Bromo-3-(4-chlorophenyl)benzo[4,5]thiazolo[2,3-*c*][1,2,4]triazole (4u)**

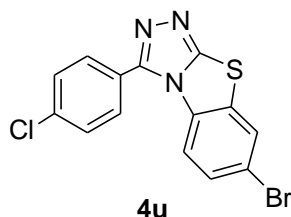

Brown powder; Mp 297-298 °C; **IR** (KBr)  $\nu$ : 3064, 1726, 1602, 1485, 862, 842, 775, 669 cm<sup>-1</sup>; **<sup>1</sup>H NMR** (DMSO-*d*<sub>6</sub>, 500 MHz):  $\delta$  = 8.38 (s, 1H, ArH), 7.85 (d,  $J$  = 8.0 Hz, 2H, ArH), 7.72 (d,  $J$  = 8.0 Hz, 2H, ArH), 7.61 (d,  $J$  = 8.6 Hz, 1H, ArH), 7.32 (d,  $J$  = 8.7 Hz, 1H, ArH); **<sup>13</sup>C NMR** (CDCl<sub>3</sub>, 125 MHz):  $\delta$  = 137.4, 134.6, 130.3, 129.8, 129.6, 128.9, 127.6, 125.1, 119.5, 115.3; **HRMS** (ESI-TOF<sup>+</sup>):  $m/z$  calcd for C<sub>14</sub>H<sub>9</sub>N<sub>3</sub>SBr [(M + H)<sup>+</sup>], 363.9311; found, 363.9320.

**7-Bromo-3-(*p*-tolyl)benzo[4,5]thiazolo[2,3-*c*][1,2,4]triazole (4v)**

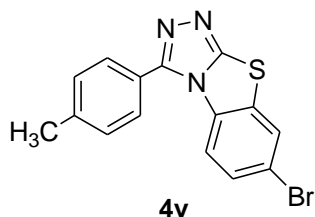

Brown powder; Mp 254-255 °C; **IR** (KBr)  $\nu$ : 3098, 2921, 2852, 1724, 1484, 848, 829, 816, 771 cm<sup>-1</sup>; **<sup>1</sup>H NMR** (CDCl<sub>3</sub>, 500 MHz):  $\delta$  = 7.83 (d,  $J$  = 1.6 Hz, 1H, ArH), 7.65 (d,  $J$  = 8.0 Hz, 2H, ArH), 7.45-7.43 (m, 1H, ArH), 7.42-7.41 (m, 2H, ArH), 7.40-7.39 (m, 1H, ArH), 2.50 (s, 3H, CH<sub>3</sub>); **<sup>13</sup>C NMR** (CDCl<sub>3</sub>, 125 MHz):  $\delta$  = 141.3, 134.5, 129.9, 129.5, 129.0, 128.9, 127.3, 123.5, 119.2, 115.3, 21.6; **HRMS** (ESI-TOF<sup>+</sup>):  $m/z$  calcd for C<sub>15</sub>H<sub>11</sub>N<sub>3</sub>SBr [(M + H)<sup>+</sup>], 343.9857; found, 343.9846.

**7-Methyl-3-phenylbenzo[4,5]thiazolo[2,3-*c*][1,2,4]triazole (4w)**

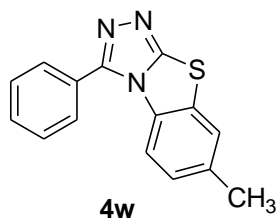

White powder; Mp 180-181 °C; **IR** (KBr) *v*: 3025, 2920, 2851, 1636, 1584, 1493, 1385, 813, 762, 694 cm<sup>-1</sup>; **<sup>1</sup>H NMR** (CDCl<sub>3</sub>, 500 MHz):  $\delta$  = 7.80–7.79 (m, 2H, ArH), 7.61-7.59 (m, 3H, ArH), 7.50 (s, 1H, ArH), 7.42 (d, *J* = 8.5 Hz, 1H, ArH), 7.12 (d, *J* = 8.5 Hz, 1H, ArH), 2.45 (s, 3H, CH<sub>3</sub>); **<sup>13</sup>C NMR** (CDCl<sub>3</sub>, 125 MHz):  $\delta$  = 136.7, 132.6, 130.6, 129.1, 128.9, 127.9, 127.2, 126.9, 124.8, 113.9, 21.3; **HRMS** (ESI-TOF<sup>+</sup>): *m/z* calcd for C<sub>15</sub>H<sub>12</sub>N<sub>3</sub>S [(M + H)<sup>+</sup>], 266.0752; found, 266.0763.

### 3-(4-Chlorophenyl)-7-methylbenzo[4,5]thiazolo[2,3-c][1,2,4]triazole (4x)

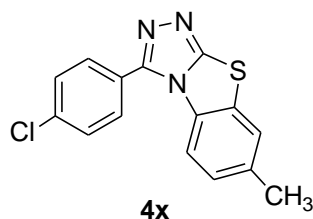

Gray powder; Mp 222-223 °C; **IR** (KBr) *v*: 3098, 3078, 2920, 2853, 1604, 1493, 1383, 827, 723, 698 cm<sup>-1</sup>; **<sup>1</sup>H NMR** (CDCl<sub>3</sub>, 500 MHz):  $\delta$  = 7.75 (d, *J* = 8.4 Hz, 2H, ArH), 7.58 (d, *J* = 8.5 Hz, 2H, ArH), 7.51 (s, 1H, ArH), 7.39 (d, *J* = 8.4 Hz, 1H, ArH), 7.14 (d, *J* = 8.3 Hz, 1H, ArH), 2.46 (s, 3H, CH<sub>3</sub>); **<sup>13</sup>C NMR** (CDCl<sub>3</sub>, 125 MHz):  $\delta$  = 136.9 (*J* = 8.3 Hz), 136.8, 132.7, 130.4, 129.4, 127.8, 127.3, 125.6, 124.9, 113.8, 21.3; **HRMS** (ESI-TOF<sup>+</sup>): *m/z* calcd for C<sub>15</sub>H<sub>11</sub>N<sub>3</sub>SCl [(M + H)<sup>+</sup>], 300.0362; found, 300.0375.

### 3-(4-Methoxyphenyl)-7-methylbenzo[4,5]thiazolo[2,3-c][1,2,4]triazole (4y)

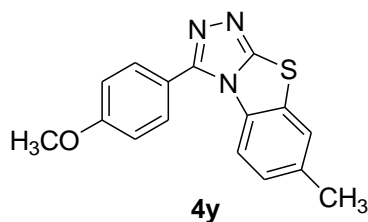

White powder; Mp 161-162 °C; **IR** (KBr) *v*: 3055, 2921, 2850, 1615, 1494, 1383, 840, 805, 731 cm<sup>-1</sup>; **<sup>1</sup>H NMR** (CDCl<sub>3</sub>, 500 MHz):  $\delta$  = 7.72 (d, *J* = 7.5 Hz, 2H, ArH), 7.48 (s,

1H, ArH), 7.42 (d,  $J = 8.0$  Hz, 1H, ArH), 7.12 (d,  $J = 6.7$  Hz, 3H, ArH), 3.90 (s, 3H, OCH<sub>3</sub>), 2.45 (s, 3H, CH<sub>3</sub>); <sup>13</sup>C NMR (CDCl<sub>3</sub>, 125 MHz):  $\delta = 161.4, 136.5, 132.7, 130.6, 128.0, 127.2, 124.8, 119.2, 114.4, 113.9, 55.5, 21.3$ ; HRMS (ESI-TOF<sup>+</sup>):  $m/z$  calcd for C<sub>16</sub>H<sub>14</sub>N<sub>3</sub>OS [(M + H)<sup>+</sup>], 296.0858; found, 298.0849.

### 3-Benzylbenzo[4,5]thiazolo[2,3-*c*][1,2,4]triazole (4z)

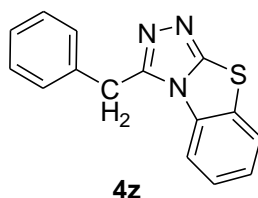

Cyan powder; Mp 170-171 °C; IR (KBr)  $\nu$ : 3059, 2925, 1632, 1600, 1489, 748, 727, 681 cm<sup>-1</sup>; <sup>1</sup>H NMR (CDCl<sub>3</sub>, 500 MHz):  $\delta = 7.64$  (d,  $J = 6.4$  Hz, 1H, ArH), 7.42 (d,  $J = 6.3$  Hz, 1H, ArH), 7.34-7.31 (m, 4H, ArH), 7.28-7.26 (m, 3H, ArH), 4.65 (s, 2H, CH<sub>2</sub>); <sup>13</sup>C NMR (CDCl<sub>3</sub>, 125 MHz):  $\delta = 134.5, 132.4, 129.1, 128.1, 127.4, 126.6, 126.0, 124.6, 114.1, 32.5$ ; HRMS (ESI-TOF<sup>+</sup>):  $m/z$  calcd for C<sub>15</sub>H<sub>12</sub>N<sub>3</sub>S [(M + H)<sup>+</sup>], 266.0752; found, 266.0741.

### References

1. G. Jayanthi, S. Muthusamy, R. Paramasivam, V. T. Ramakrishnan, N. Ramasamy, P. Ramamurthy, *J. Org. Chem.*, 1997, **62**, 5766-5770.

<sup>1</sup>H and <sup>13</sup>C NMR spectra of compound 4

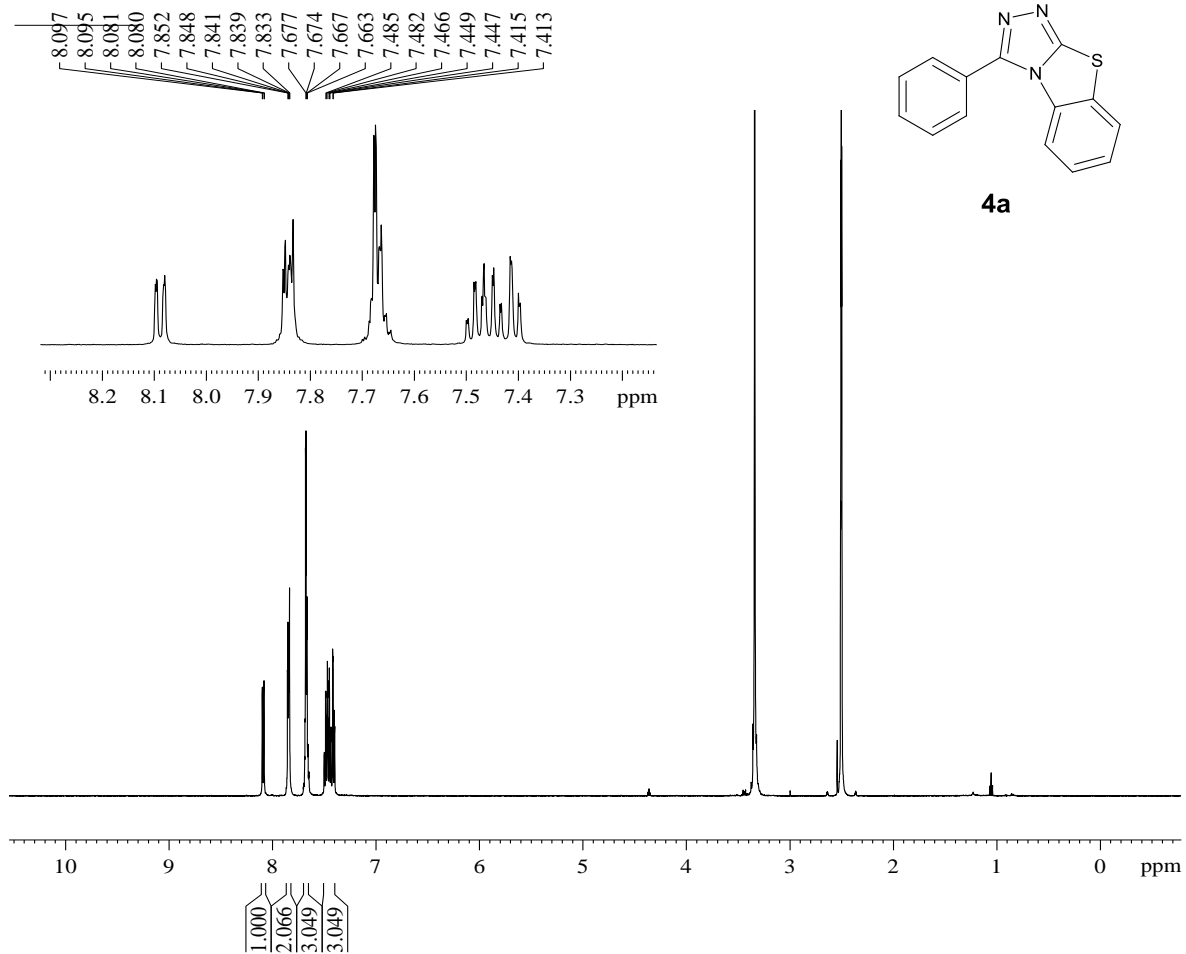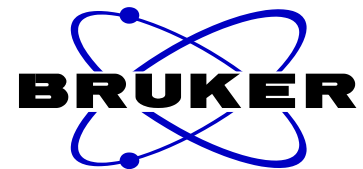

NAME Lm-2-1b  
 EXPNO 1  
 PROCNO 1  
 Date\_ 20111027  
 Time 19.39  
 INSTRUM av500  
 PROBHD 5 mm PABBO BB-  
 PULPROG zg30  
 TD 32768  
 SOLVENT DMSO  
 NS 8  
 DS 1  
 SWH 10000.000 Hz  
 FIDRES 0.305176 Hz  
 AQ 1.6385000 sec  
 RG 575  
 DW 50.000 usec  
 DE 6.00 usec  
 TE 296.1 K  
 D1 2.00000000 sec  
 TD0 1

===== CHANNEL f1 =====  
 NUC1 1H  
 P1 13.50 usec  
 PL1 2.20 dB  
 SFO1 500.0335010 MHz  
 SI 16384  
 SF 500.0300015 MHz  
 WDW EM  
 SSB 0  
 LB 0.30 Hz  
 GB 0  
 PC 2.00

LM-2-1B 13C 1D 2011 11 03

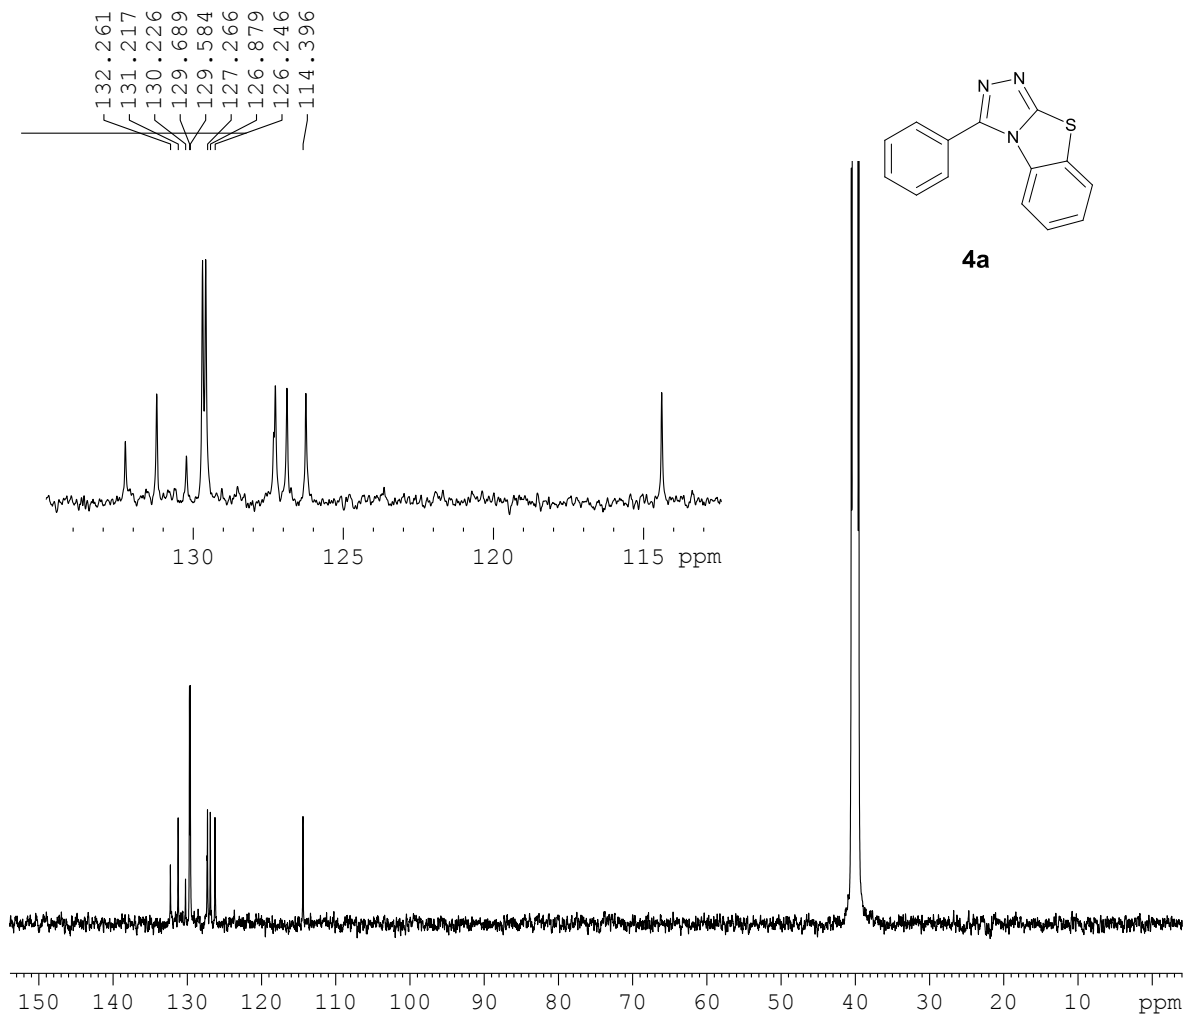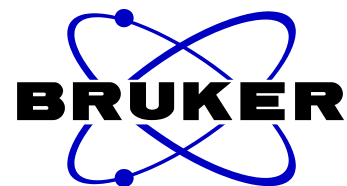

NAME Lm-2-1b  
EXPNO 2  
PROCNO 1  
Date\_ 20111103  
Time\_ 13.08  
INSTRUM av500  
PROBHD 5 mm PABBO BB-  
PULPROG zgpg30  
TD 65536  
SOLVENT DMSO  
NS 2096  
DS 2  
SWH 32679.738 Hz  
FIDRES 0.498653 Hz  
AQ 1.0027661 sec  
RG 3640  
DW 15.300 usec  
DE 6.00 usec  
TE 298.3 K  
D1 2.00000000 sec  
d11 0.03000000 sec  
DELTA 1.89999998 sec  
TD0 1

==== CHANNEL f1 =====  
NUC1 13C  
P1 9.60 usec  
PL1 2.00 dB  
SFO1 125.7464750 MHz

==== CHANNEL f2 =====  
CPDPRG2 waltz16  
NUC2 1H  
PCPD2 80.00 usec  
PL2 2.20 dB  
PL12 17.66 dB  
PL13 17.66 dB  
SFO2 500.0355000 MHz  
SI 32768  
SF 125.7326387 MHz  
WDW EM  
SSB 0  
LB 6.00 Hz  
GB 0  
PC 2.00

8.084  
7.890  
7.873  
7.749  
7.732  
7.508  
7.506  
7.494  
7.491  
7.479  
7.475  
7.463  
7.460  
7.448  
7.446  
7.436  
7.421  
7.418

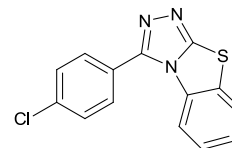

4b

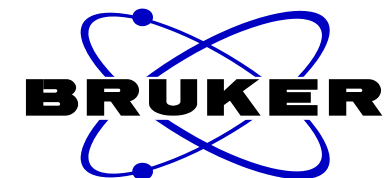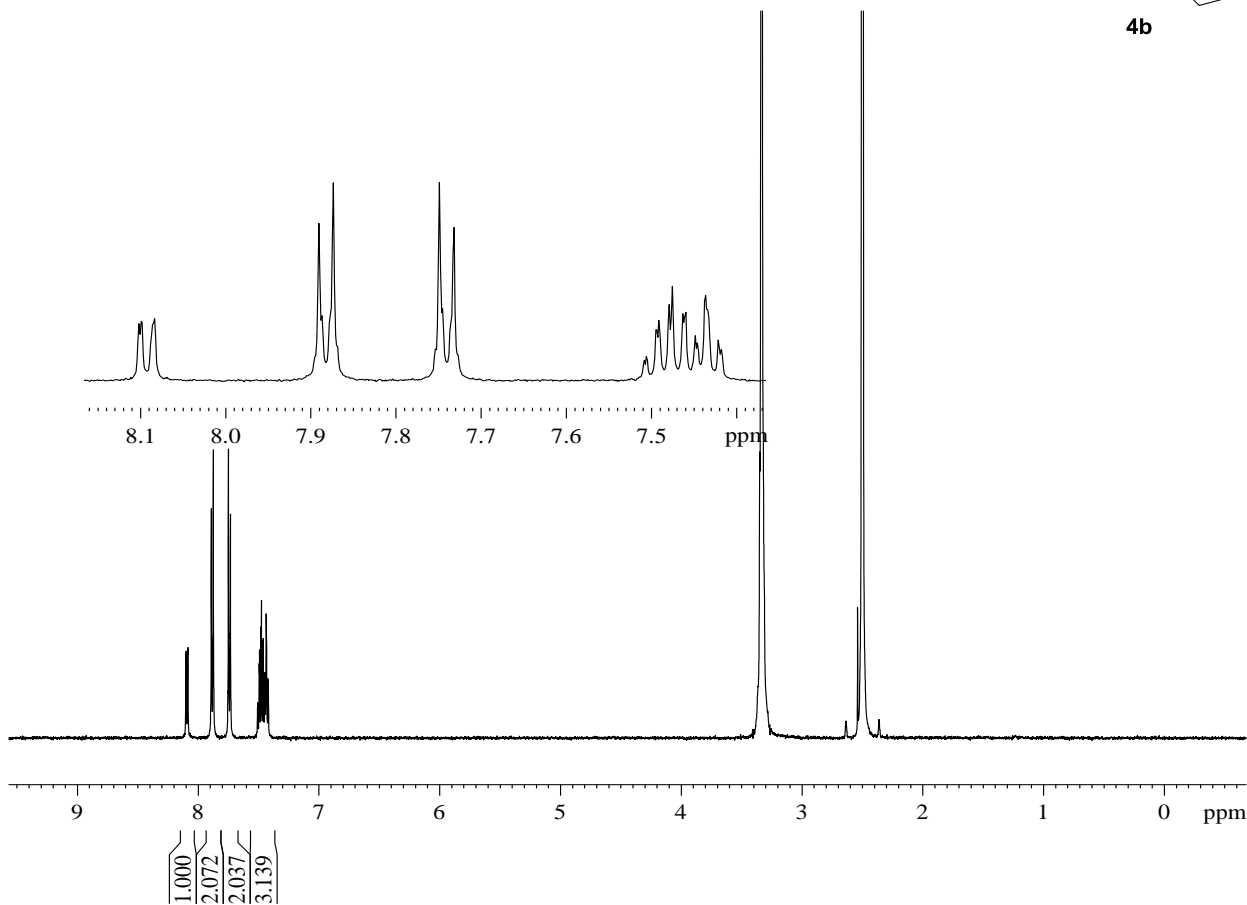

NAME Lm-2-2b  
EXPNO 1  
PROCNO 1  
Date\_ 20111114  
Time 19.59  
INSTRUM av500  
PROBHD 5 mm PABBO BB-  
PULPROG zg30  
TD 32768  
SOLVENT DMSO  
NS 8  
DS 1  
SWH 10000.000 Hz  
FIDRES 0.305176 Hz  
AQ 1.6385000 sec  
RG 575  
DW 50.000 usec  
DE 6.00 usec  
TE 296.0 K  
D1 2.00000000 sec  
TD0 1

===== CHANNEL f1 =====  
NUC1 1H  
P1 13.50 usec  
PL1 2.20 dB  
SFO1 500.0335010 MHz  
SI 16384  
SF 500.0300015 MHz  
WDW EM  
SSB 0  
LB 0.30 Hz  
GB 0  
PC 2.00

LM-2-2B 13C 1D 2011 11 21

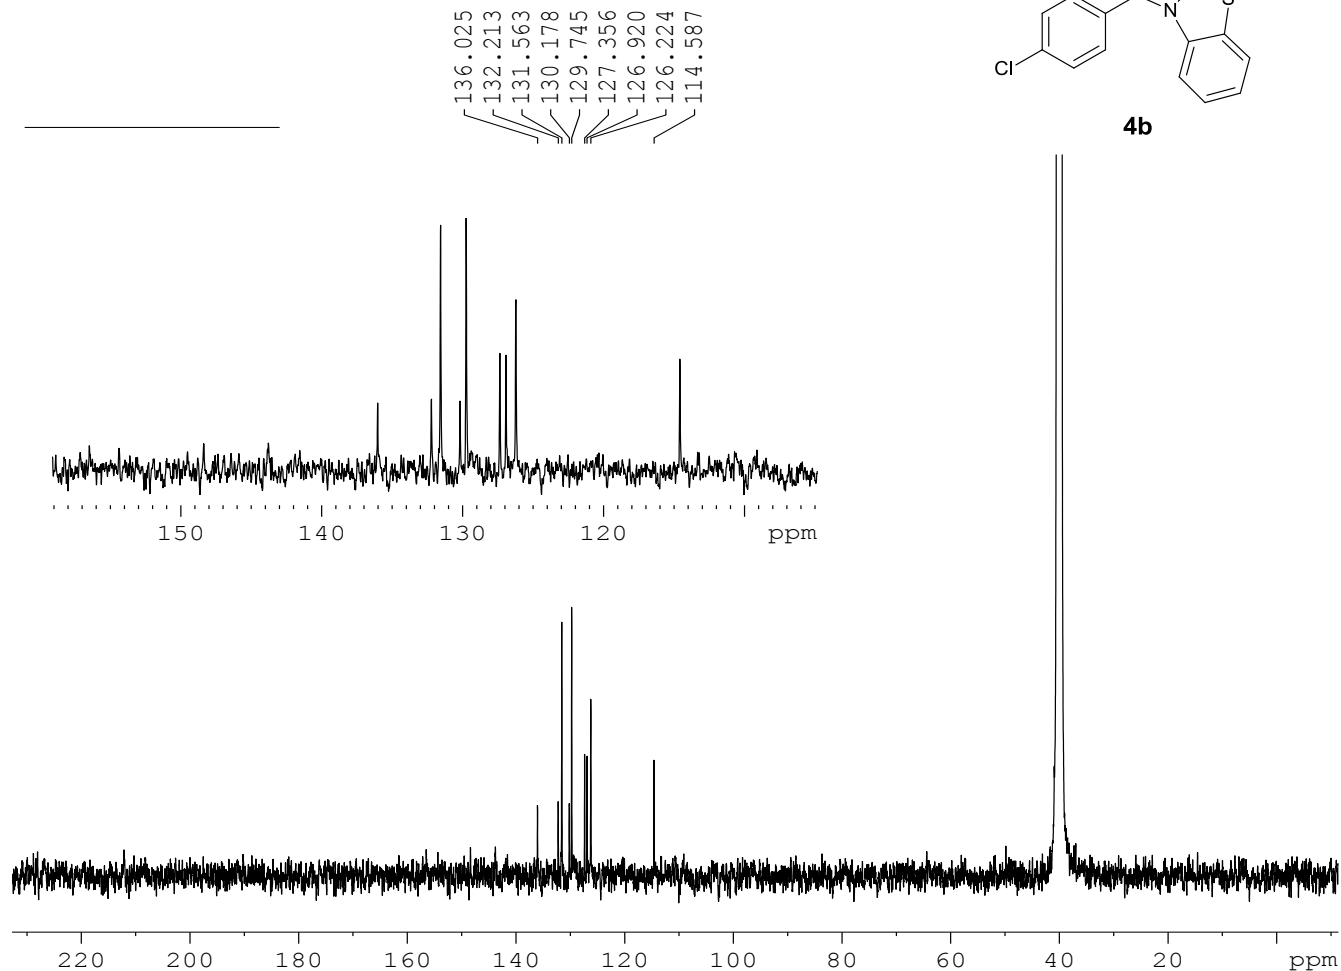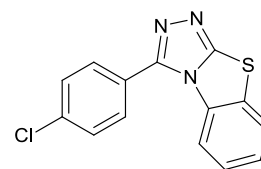

4b

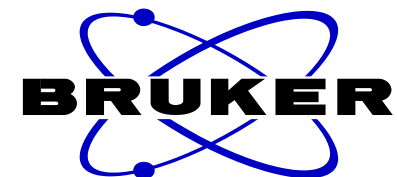

NAME Lm-2-2b  
EXPNO 21  
PROCNO 1  
Date\_ 20111121  
Time\_ 18.09  
INSTRUM av500  
PROBHD 5 mm PABBO BB-  
PULPROG zgpg30  
TD 65536  
SOLVENT DMSO  
NS 2167  
DS 2  
SWH 32679.738 Hz  
FIDRES 0.498653 Hz  
AQ 1.0027661 sec  
RG 14600  
DW 15.300 usec  
DE 6.00 usec  
TE 295.3 K  
D1 2.00000000 sec  
d11 0.03000000 sec  
DELTA 1.89999998 sec  
TD0 1

==== CHANNEL f1 =====  
NUC1 13C  
P1 9.60 usec  
PL1 2.00 dB  
SFO1 125.7464750 MHz

==== CHANNEL f2 =====  
CPDPRG2 waltz16  
NUC2 1H  
PCPD2 80.00 usec  
PL2 2.20 dB  
PL12 17.66 dB  
PL13 17.66 dB  
SFO2 500.0355000 MHz  
SI 32768  
SF 125.7326387 MHz  
WDW EM  
SSB 0  
LB 6.00 Hz  
GB 0  
PC 2.00



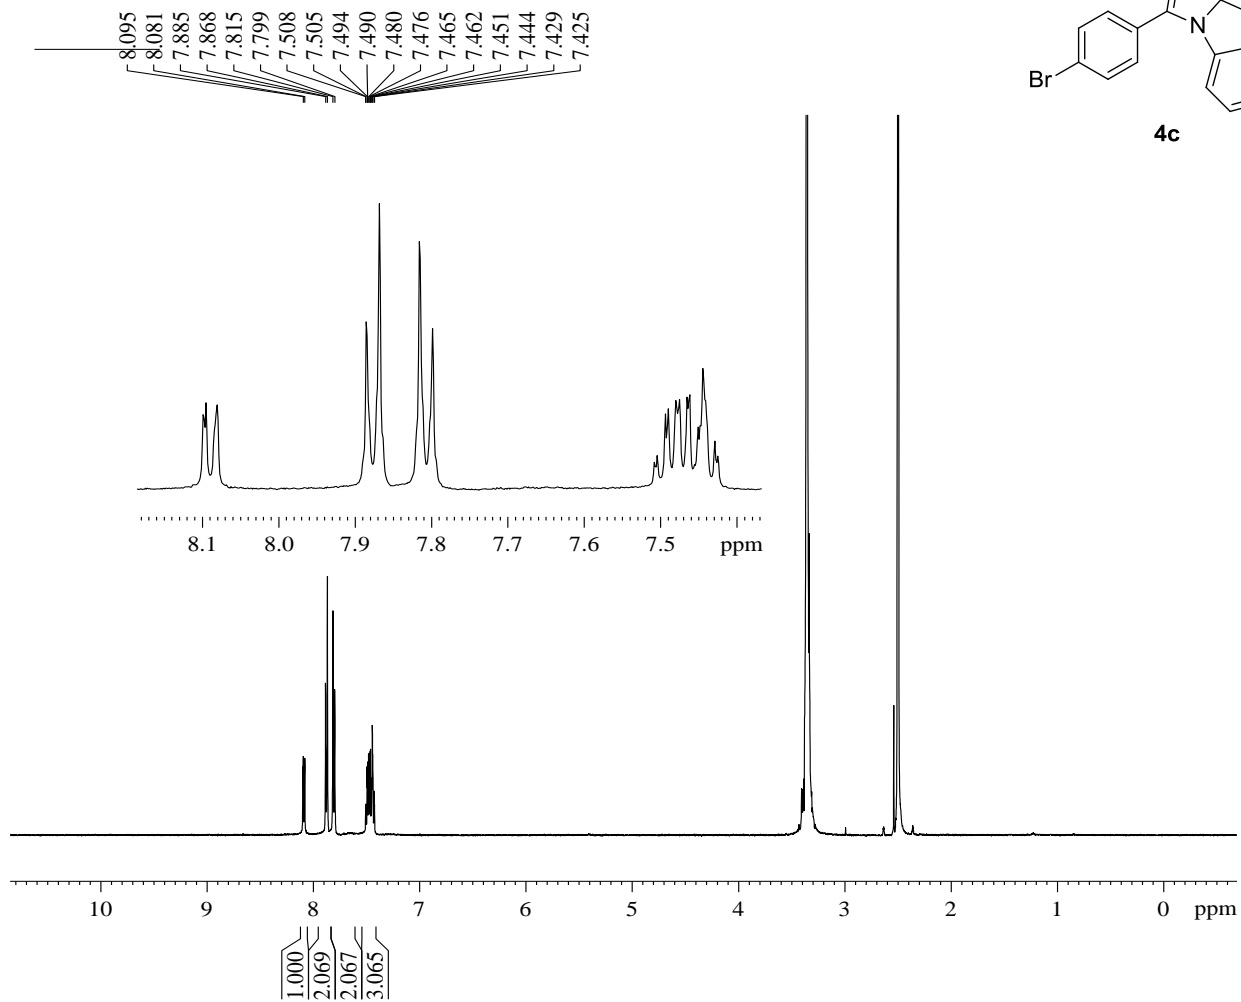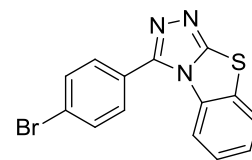

4c

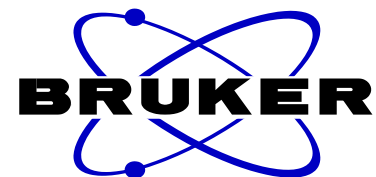

NAME Lm-3B  
 EXPNO 1  
 PROCNO 1  
 Date\_ 20111122  
 Time 16.01  
 INSTRUM av500  
 PROBHD 5 mm PABBO BB-  
 PULPROG zg30  
 TD 32768  
 SOLVENT DMSO  
 NS 8  
 DS 1  
 SWH 10000.000 Hz  
 FIDRES 0.305176 Hz  
 AQ 1.6385000 sec  
 RG 322  
 DW 50.000 usec  
 DE 6.00 usec  
 TE 294.8 K  
 D1 2.0000000 sec  
 TD0 1

===== CHANNEL f1 =====  
 NUC1 1H  
 P1 13.50 usec  
 PL1 2.20 dB  
 SFO1 500.0335010 MHz  
 SI 16384  
 SF 500.0300015 MHz  
 WDW EM  
 SSB 0  
 LB 0.30 Hz  
 GB 0  
 PC 2.00

LM-2-3B 13C 1D 2011 11 29

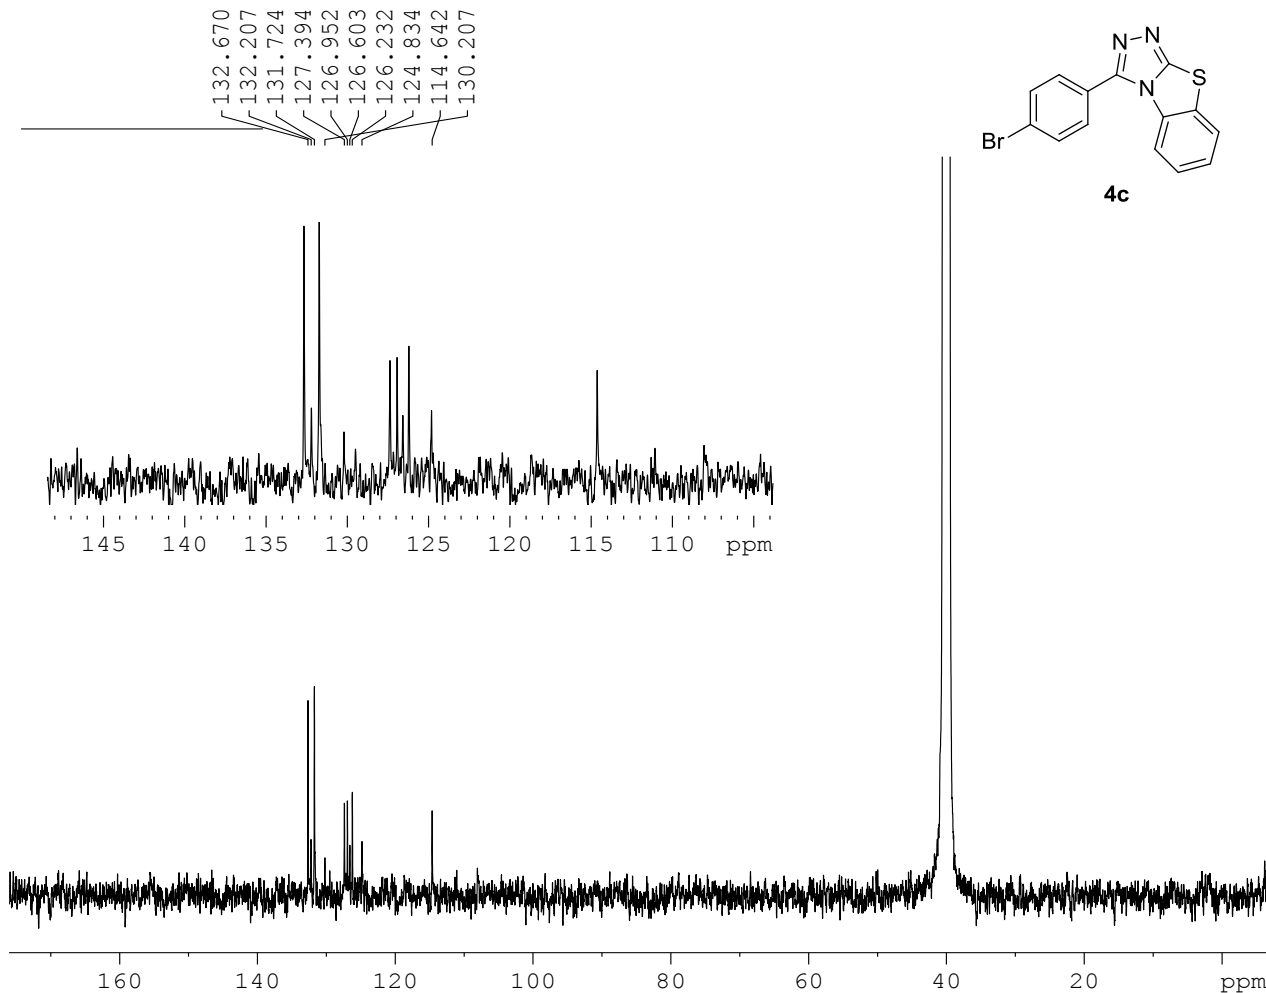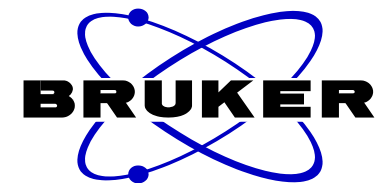

NAME Lm-2-3B  
EXPNO 2  
PROCNO 1  
Date\_ 20111129  
Time\_ 13.19  
INSTRUM av500  
PROBHD 5 mm PABBO BB-  
PULPROG zgpg30  
TD 65536  
SOLVENT DMSO  
NS 2080  
DS 2  
SWH 32679.738 Hz  
FIDRES 0.498653 Hz  
AQ 1.0027661 sec  
RG 5790  
DW 15.300 usec  
DE 6.00 usec  
TE 298.1 K  
D1 2.00000000 sec  
d11 0.03000000 sec  
DELTA 1.89999998 sec  
TD0 1

==== CHANNEL f1 =====  
NUC1 13C  
P1 9.60 usec  
PL1 2.00 dB  
SFO1 125.7464750 MHz

==== CHANNEL f2 =====  
CPDPRG2 waltz16  
NUC2 1H  
PCPD2 80.00 usec  
PL2 2.20 dB  
PL12 17.66 dB  
PL13 17.66 dB  
SFO2 500.0355000 MHz  
SI 32768  
SF 125.7326387 MHz  
WDW EM  
SSB 0  
LB 6.00 Hz  
GB 0  
PC 2.00

—lm-2-7b 1H 2011 12 14

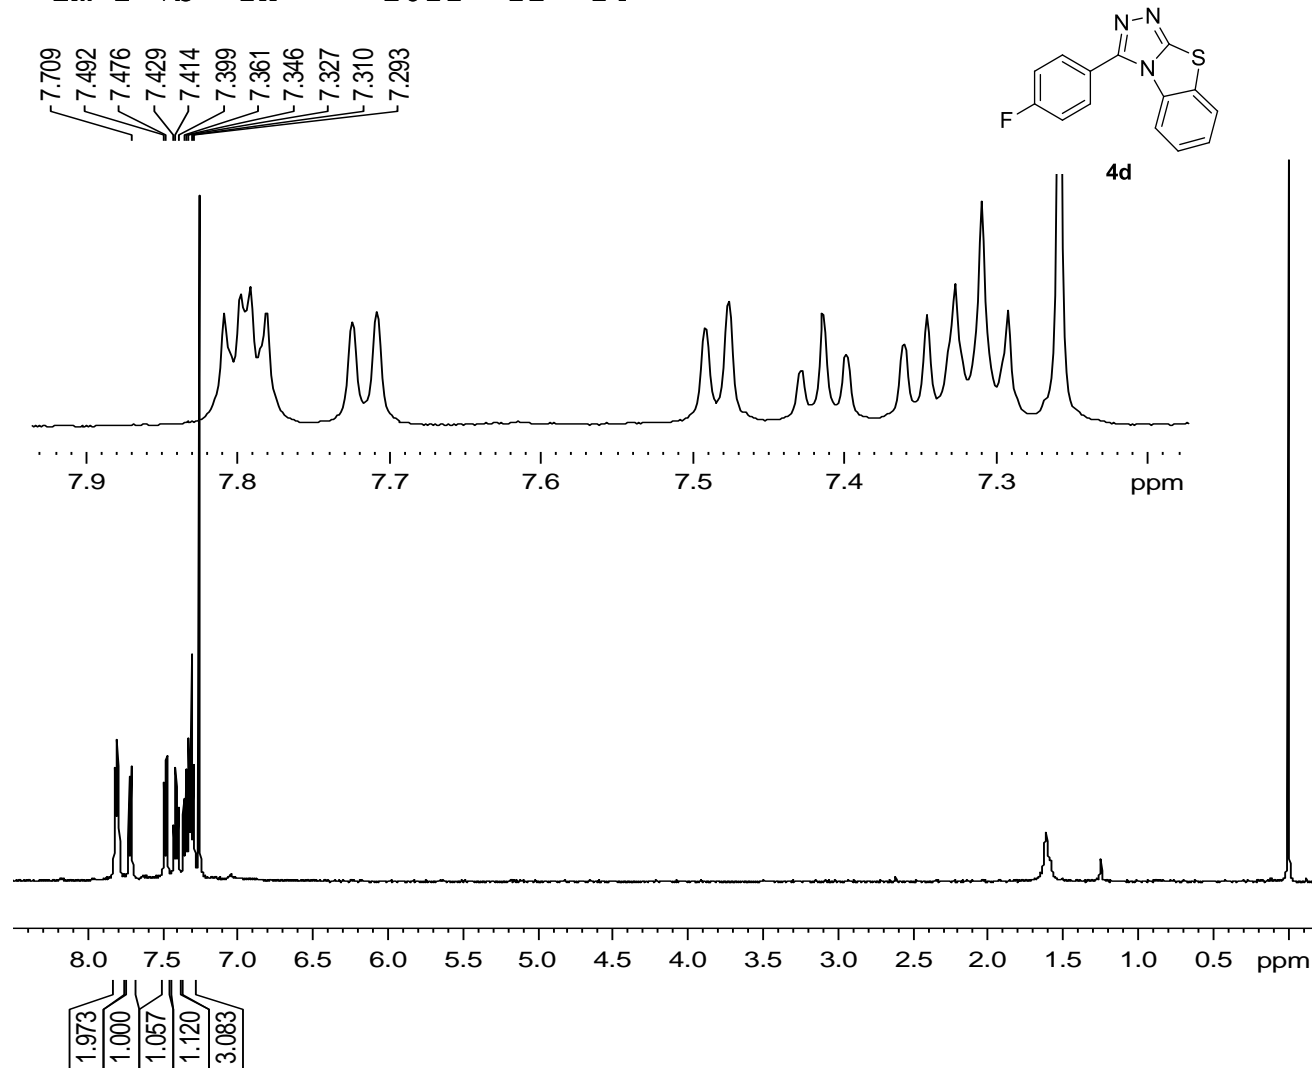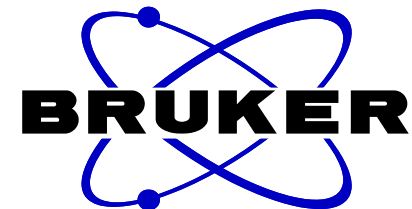

NAME lm-2-7b  
EXPNO 11  
PROCNO 1  
Date\_ 20111214  
Time\_ 18.40  
INSTRUM av500  
PROBHD 5 mm PABBO BB-  
PULPROG zg30  
TD 32768  
SOLVENT CDCl3  
NS 4  
DS 1  
SWH 10000.000 Hz  
FIDRES 0.305176 Hz  
AQ 1.6385000 sec  
RG 812  
DW 50.000 usec  
DE 6.00 usec  
TE 294.0 K  
D1 2.00000000 sec  
TD0 1

===== CHANNEL f1 =====  
NUC1 1H  
P1 13.50 usec  
PL1 2.20 dB  
SFO1 500.0335010 MHz  
SI 16384  
SF 500.0300111 MHz  
WDW EM  
SSB 0  
LB 0.30 Hz  
GB 0  
PC 2.00

— Im-2-7b 13C 1D 2011 12 19

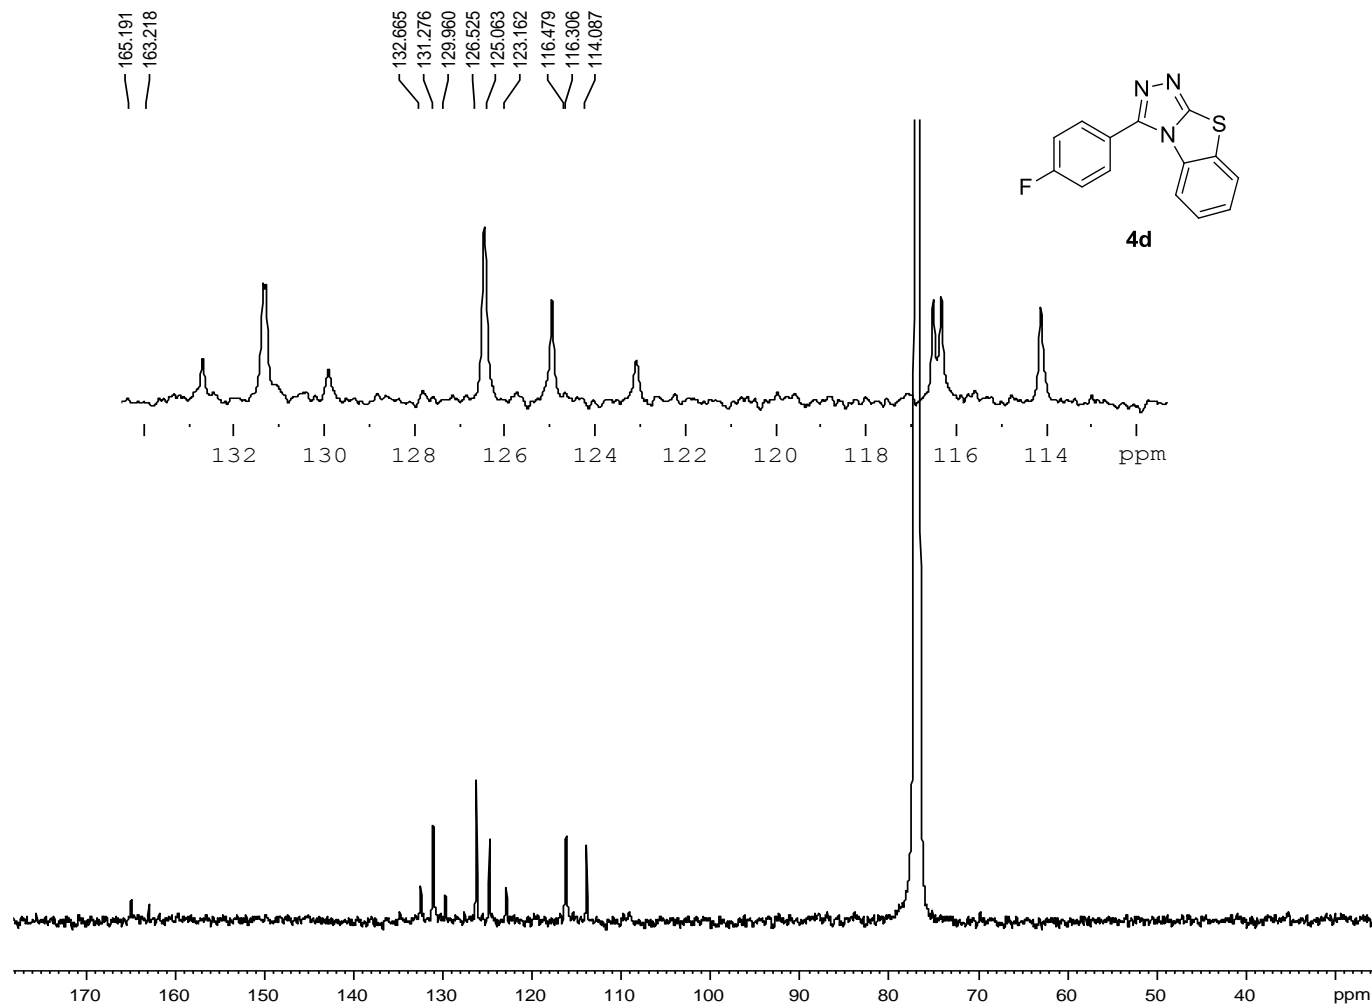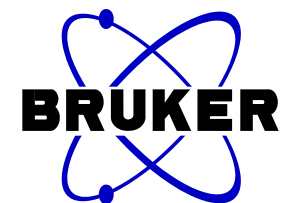

NAME Im-2-7b  
EXPNO 2  
PROCNO 1  
Date\_ 20111219  
Time 9.26  
INSTRUM av500  
PROBHD 5 mm PABBO BB-  
PULPROG zgpg30  
TD 65536  
SOLVENT CDCl3  
NS 4373  
DS 2  
SWH 32679.738 Hz  
FIDRES 0.498653 Hz  
AQ 1.0027661 sec  
RG 18400  
DW 15.300 usec  
DE 6.00 usec  
TE 294.5 K  
D1 2.00000000 sec  
d11 0.03000000 sec  
DELTA 1.89999998 sec  
TD0 1

==== CHANNEL f1 =====  
NUC1 13C  
P1 9.60 usec  
PL1 2.00 dB  
SFO1 125.7464750 MHz

==== CHANNEL f2 =====  
CPDPRG2 waltz16  
NUC2 1H  
PCPD2 80.00 usec  
PL2 2.20 dB  
PL12 17.66 dB  
PL13 17.66 dB  
SFO2 500.0355000 MHz  
SI 32768  
SF 125.7326472 MHz  
WDW EM  
SSB 0  
LB 10.00 Hz  
GB 0  
PC 2.00

Lm-5B 1H 2011 11 23

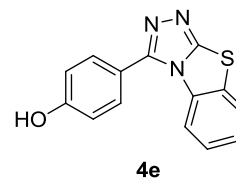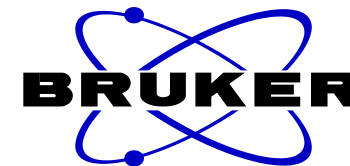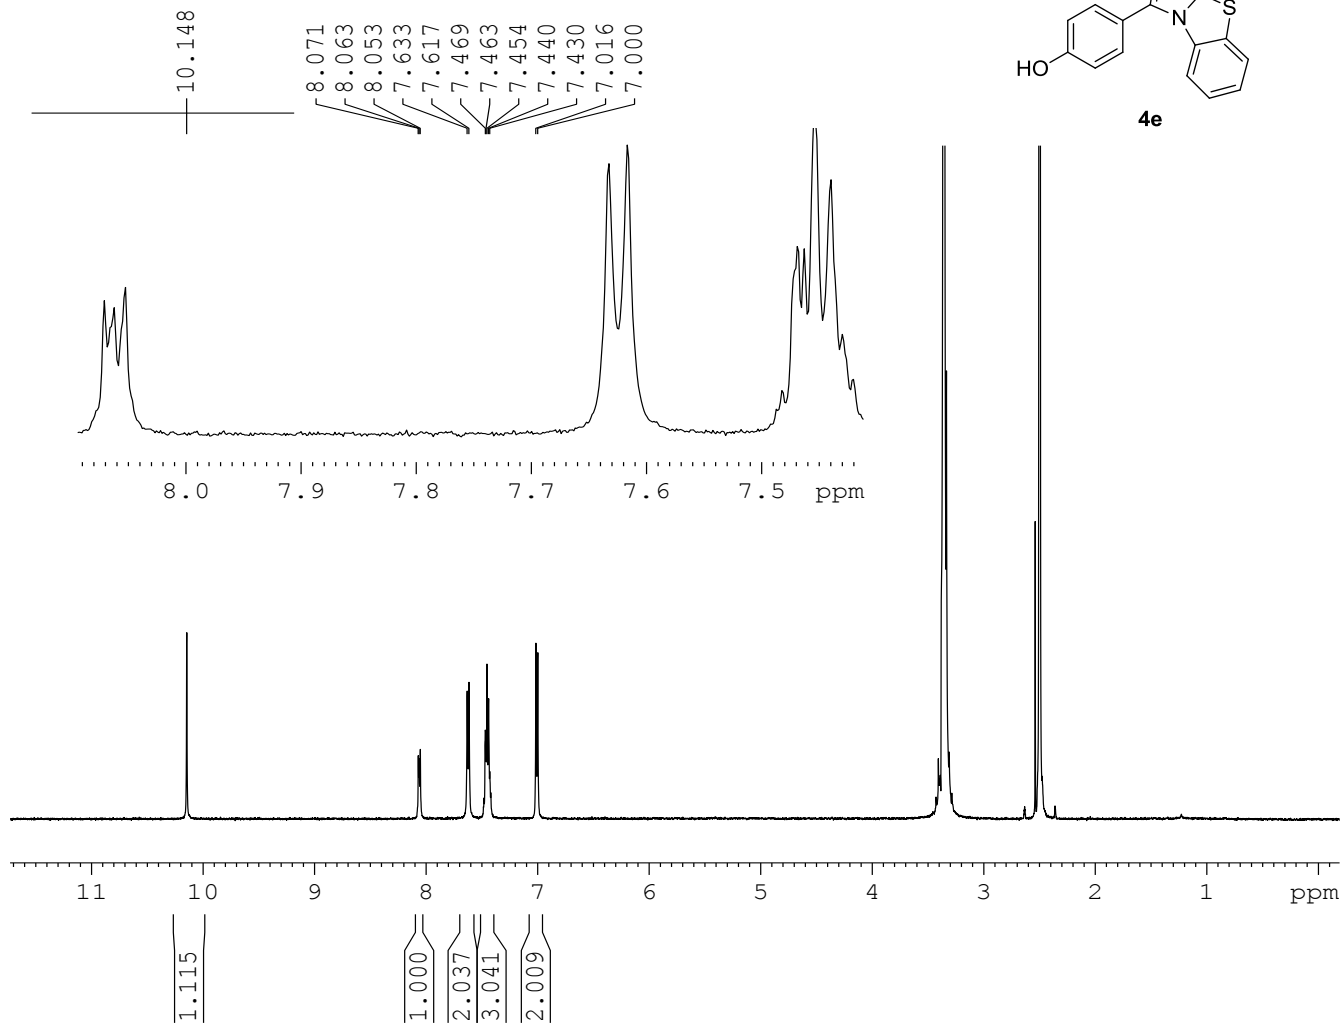

```

NAME                Lm-5B
EXPNO                1
PROCNO              1
Date_               20111122
Time_               16.10
INSTRUM             av500
PROBHD              5 mm PABBO BB-
PULPROG             zg30
TD                  32768
SOLVENT             DMSO
NS                  8
DS                  1
SWH                 10000.000 Hz
FIDRES              0.305176 Hz
AQ                  1.6385000 sec
RG                  322
DW                  50.000 usec
DE                  6.00 usec
TE                  294.8 K
D1                  2.00000000 sec
TD0                 1
  
```

```

===== CHANNEL f1 =====
NUC1                 1H
P1                   13.50 usec
PL1                  2.20 dB
SFO1                 500.0335010 MHz
SI                   16384
SF                   500.0300015 MHz
WDW                  EM
SSB                  0
LB                   0.30 Hz
GB                   0
PC                   2.00
  
```

LM-2-5B 13C 1D 2011 12 07

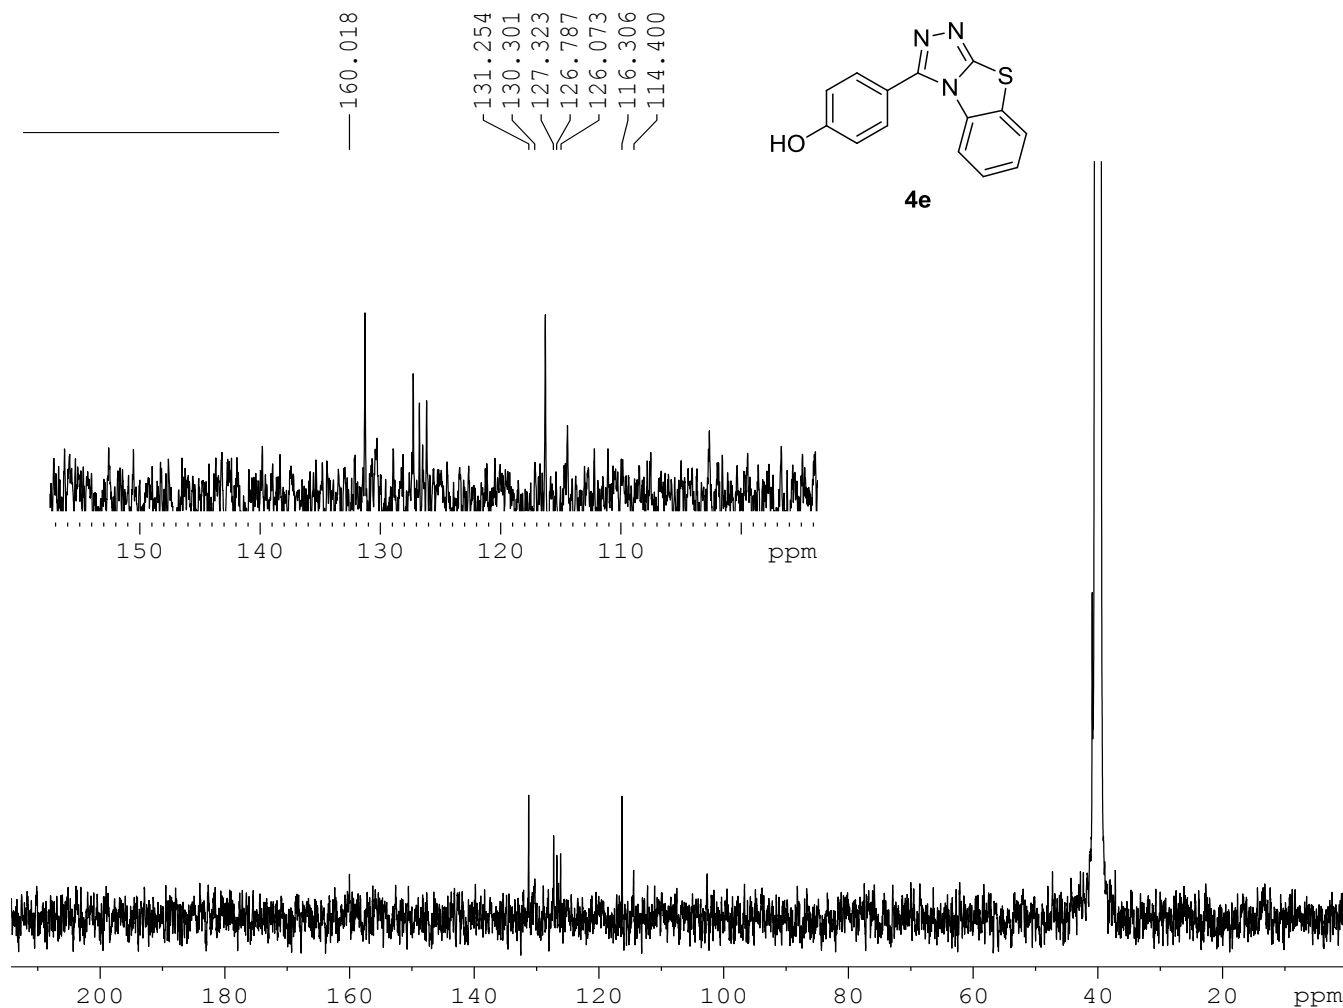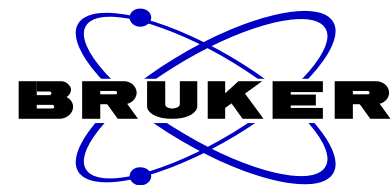

NAME LM-2-5B  
EXPNO 2  
PROCNO 1  
Date\_ 20111207  
Time\_ 13.58  
INSTRUM av500  
PROBHD 5 mm PABBO BB-  
PULPROG zgpg30  
TD 65536  
SOLVENT DMSO  
NS 932  
DS 2  
SWH 32679.738 Hz  
FIDRES 0.498653 Hz  
AQ 1.0027661 sec  
RG 18400  
DW 15.300 usec  
DE 6.00 usec  
TE 296.8 K  
D1 2.0000000 sec  
d11 0.0300000 sec  
DELTA 1.89999999 sec  
TD0 1

==== CHANNEL f1 =====  
NUC1 13C  
P1 9.60 usec  
PL1 2.00 dB  
SFO1 125.7464750 MHz

==== CHANNEL f2 =====  
CPDPRG2 waltz16  
NUC2 1H  
PCPD2 80.00 usec  
PL2 2.20 dB  
PL12 17.66 dB  
PL13 17.66 dB  
SFO2 500.0355000 MHz  
SI 32768  
SF 125.7326387 MHz  
WDW EM  
SSB 0  
LB 6.00 Hz  
GB 0  
PC 2.00

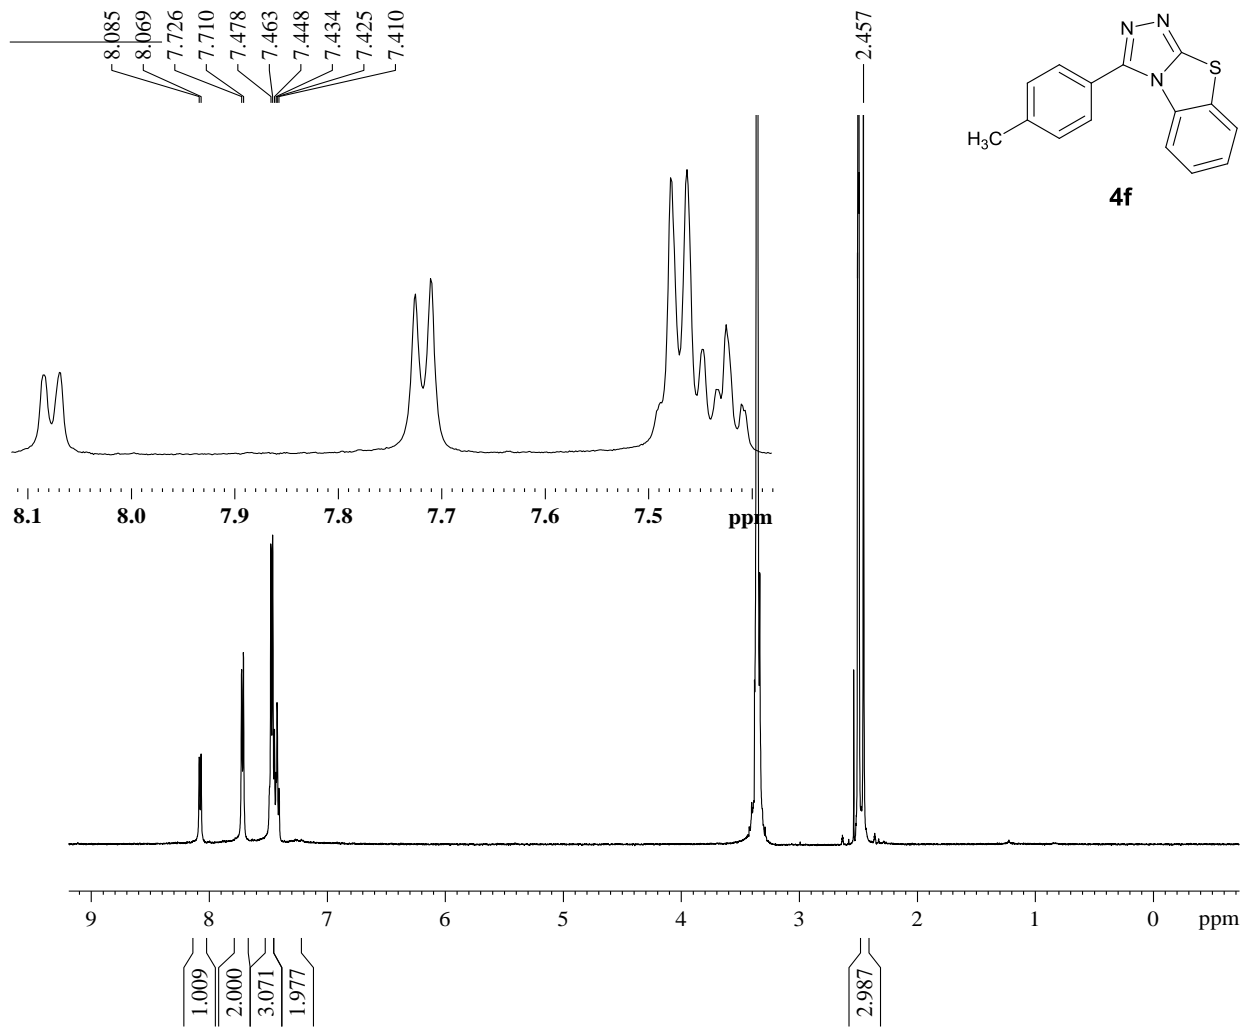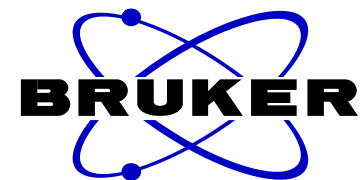

NAME Lm-4B  
 EXPNO 1  
 PROCNO 1  
 Date\_ 20111122  
 Time 16.06  
 INSTRUM av500  
 PROBHD 5 mm PABBO BB-  
 PULPROG zg30  
 TD 32768  
 SOLVENT DMSO  
 NS 8  
 DS 1  
 SWH 10000.000 Hz  
 FIDRES 0.305176 Hz  
 AQ 1.6385000 sec  
 RG 322  
 DW 50.000 usec  
 DE 6.00 usec  
 TE 294.8 K  
 D1 2.00000000 sec  
 TD0 1

===== CHANNEL f1 =====  
 NUC1 1H  
 P1 13.50 usec  
 PL1 2.20 dB  
 SFO1 500.0335010 MHz  
 SI 16384  
 SF 500.0300015 MHz  
 WDW EM  
 SSB 0  
 LB 0.30 Hz  
 GB 0  
 PC 2.00

Lm-2-4B 13C 1D 2011 11 29

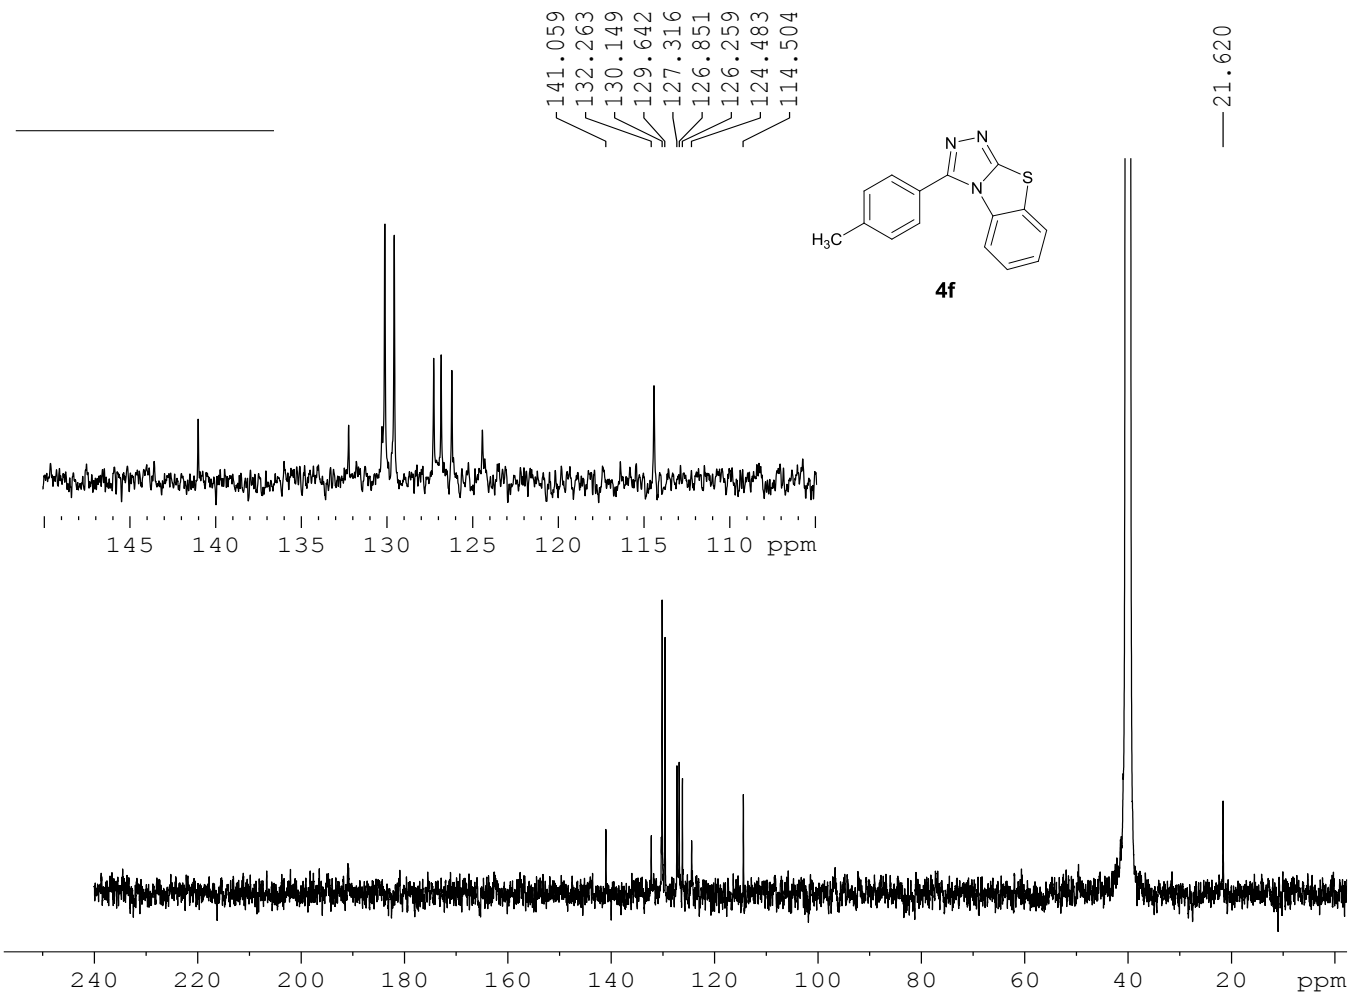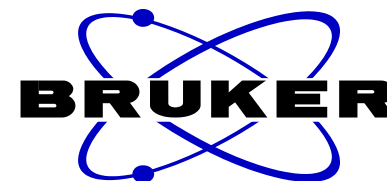

NAME Lm-2-4B  
EXPNO 2  
PROCNO 1  
Date\_ 20111129  
Time\_ 18.15  
INSTRUM av500  
PROBHD 5 mm PABBO BB-  
PULPROG zgpg30  
TD 65536  
SOLVENT DMSO  
NS 1883  
DS 2  
SWH 32679.738 Hz  
FIDRES 0.498653 Hz  
AQ 1.0027661 sec  
RG 512  
DW 15.300 usec  
DE 6.00 usec  
TE 297.8 K  
D1 2.00000000 sec  
d11 0.03000000 sec  
DELTA 1.89999998 sec  
TD0 1

==== CHANNEL f1 =====  
NUC1 13C  
P1 9.60 usec  
PL1 2.00 dB  
SFO1 125.7464750 MHz

==== CHANNEL f2 =====  
CPDPRG2 waltz16  
NUC2 1H  
PCPD2 80.00 usec  
PL2 2.20 dB  
PL12 17.66 dB  
PL13 17.66 dB  
SFO2 500.0355000 MHz  
SI 32768  
SF 125.7326387 MHz  
WDW EM  
SSB 0  
LB 6.00 Hz  
GB 0  
PC 2.00



LM-2-6B 1H 2011 12 12

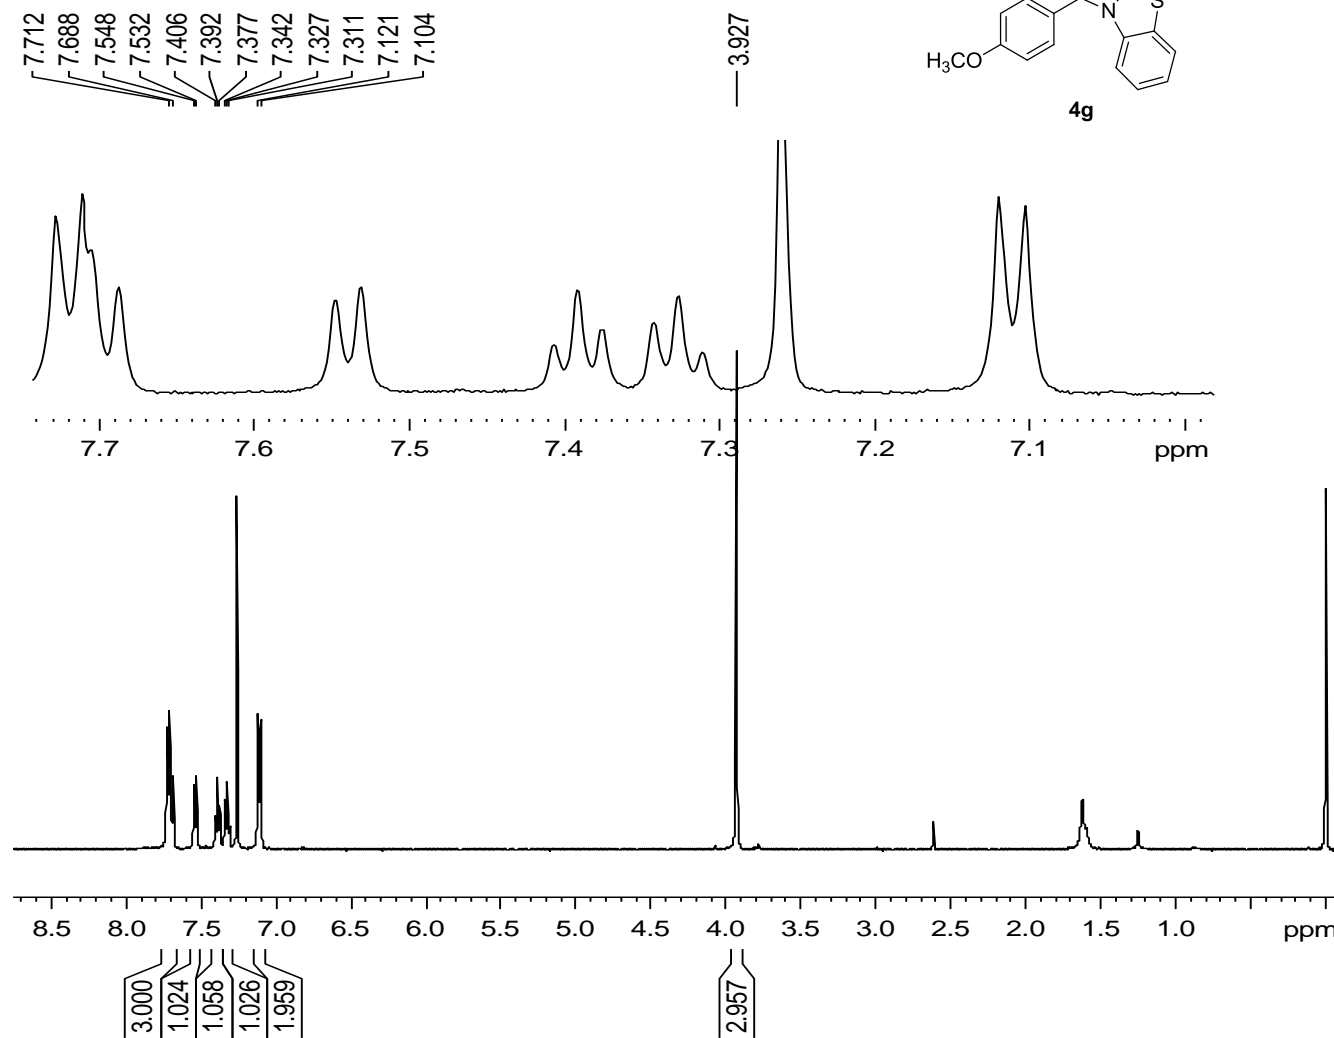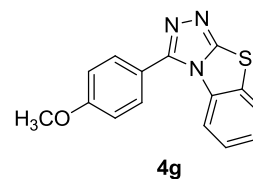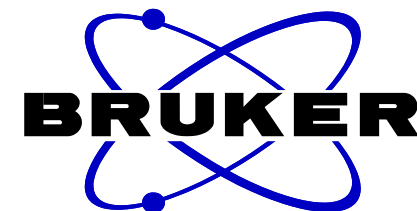

NAME LM-2-6B  
EXPNO 1  
PROCNO 1  
Date\_ 20111212  
Time\_ 20.03  
INSTRUM av500  
PROBHD 5 mm PABBO BB-  
PULPROG zg30  
TD 32768  
SOLVENT CDCl3  
NS 4  
DS 2  
SWH 10000.000 Hz  
FIDRES 0.305176 Hz  
AQ 1.6385000 sec  
RG 724  
DW 50.000 usec  
DE 6.00 usec  
TE 293.7 K  
D1 2.00000000 sec  
TD0 1

==== CHANNEL f1 =====  
NUC1 1H  
P1 13.50 usec  
PL1 2.20 dB  
SFO1 500.0335010 MHz  
SI 16384  
SF 500.0300102 MHz  
WDW EM  
SSB 0  
LB 0.10 Hz  
GB 0  
PC 4.00

— Lm-2-BB 13C 1D 2011 12 14

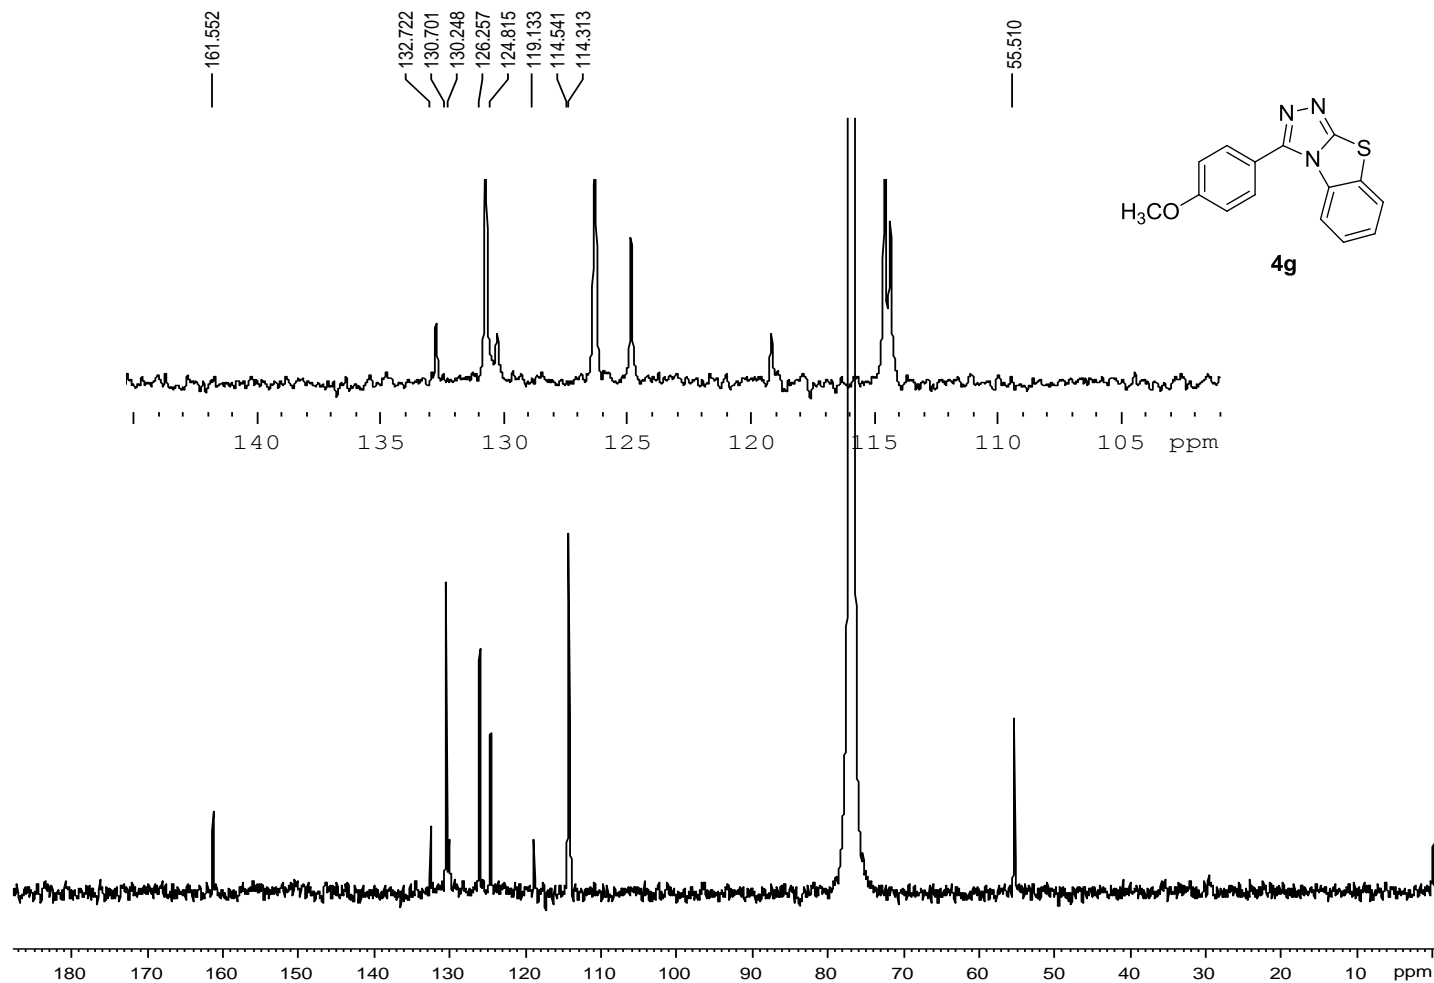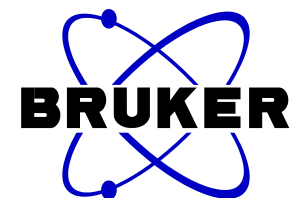

NAME Lm-2-BB  
EXPNO 2  
PROCNO 1  
Date\_ 20111214  
Time 21.57  
INSTRUM av500  
PROBHD 5 mm PABBO BB-  
PULPROG zgpg30  
TD 65536  
SOLVENT CDCl3  
NS 11361  
DS 2  
SWH 32679.738 Hz  
FIDRES 0.498653 Hz  
AQ 1.0027661 sec  
RG 2050  
DW 15.300 usec  
DE 6.00 usec  
TE 295.6 K  
D1 2.0000000 sec  
d11 0.0300000 sec  
DELTA 1.89999998 sec  
TD0 1

===== CHANNEL f1 =====  
NUC1 13C  
P1 9.60 usec  
PL1 2.00 dB  
SFO1 125.7464750 MHz

===== CHANNEL f2 =====  
CPDPRG2 w altz 16  
NUC2 1H  
PCPD2 80.00 usec  
PL2 2.60 dB  
PL12 17.66 dB  
PL13 17.66 dB  
SFO2 500.0355000 MHz  
SI 32768  
SF 125.7326395 MHz  
WDW EM  
SSB 0  
LB 10.00 Hz  
GB 0  
PC 2.00

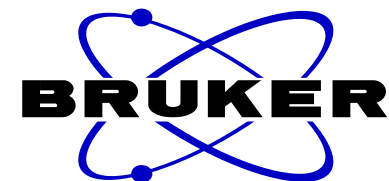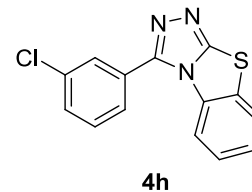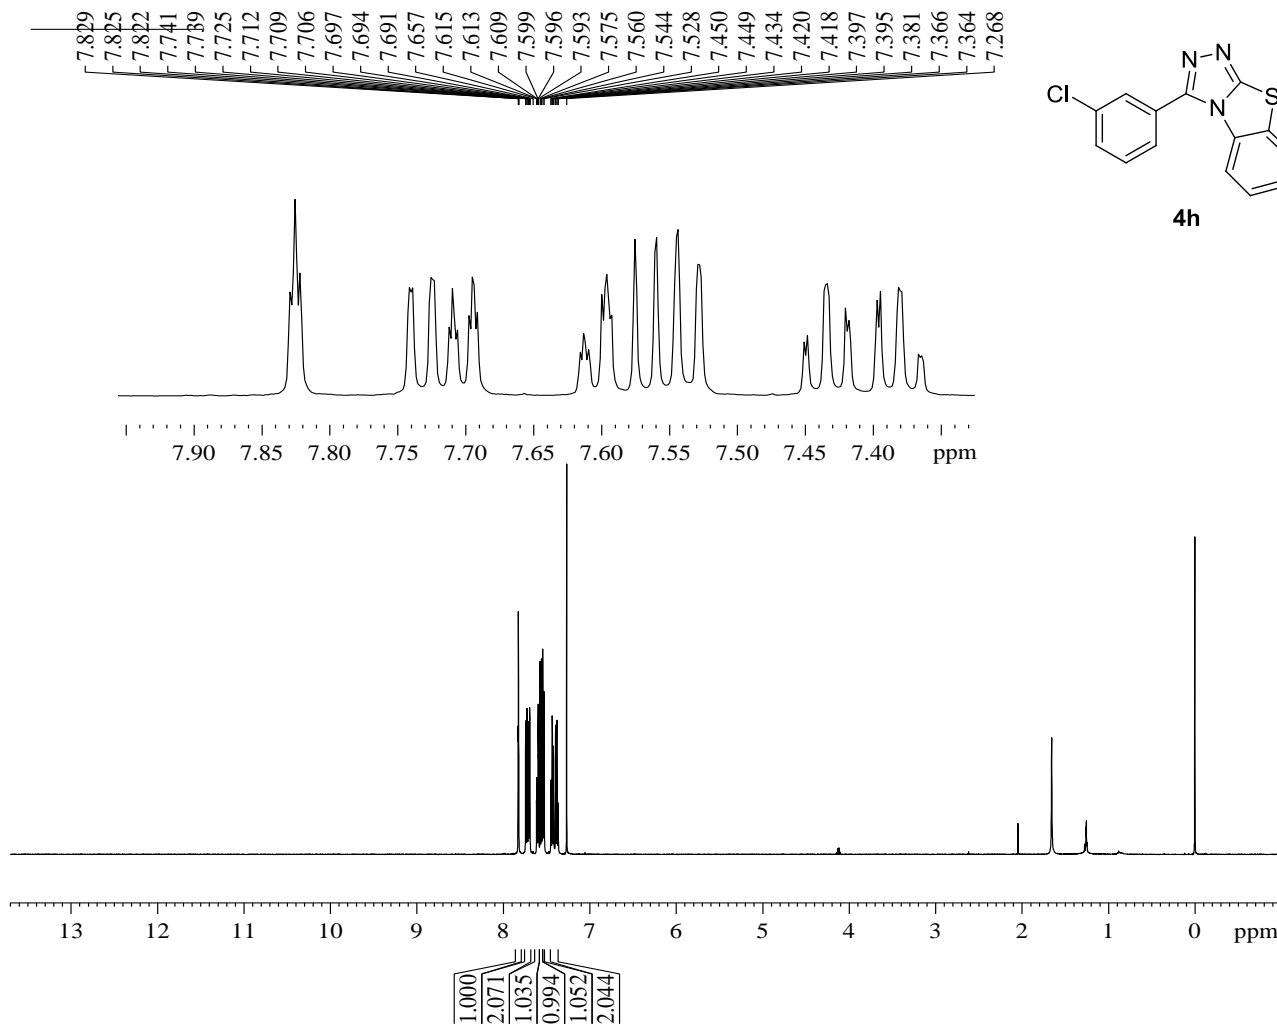

NAME LM-2-13B  
EXPNO 1  
PROCNO 1  
Date\_ 20120411  
Time 21.56  
INSTRUM av500  
PROBHD 5 mm PABBO BB-  
PULPROG zg30  
TD 32768  
SOLVENT CDCl3  
NS 8  
DS 1  
SWH 10000.000 Hz  
FIDRES 0.305176 Hz  
AQ 1.6385000 sec  
RG 645  
DW 50.000 usec  
DE 6.00 usec  
TE 297.8 K  
D1 2.00000000 sec  
TD0 1

===== CHANNEL f1 =====  
NUC1 1H  
P1 13.50 usec  
PL1 2.20 dB  
SFO1 500.0335010 MHz  
SI 16384  
SF 500.0300064 MHz  
WDW EM  
SSB 0  
LB 0.30 Hz  
GB 0  
PC 2.00

LM-2-13B 13C 1D 2012 04 12

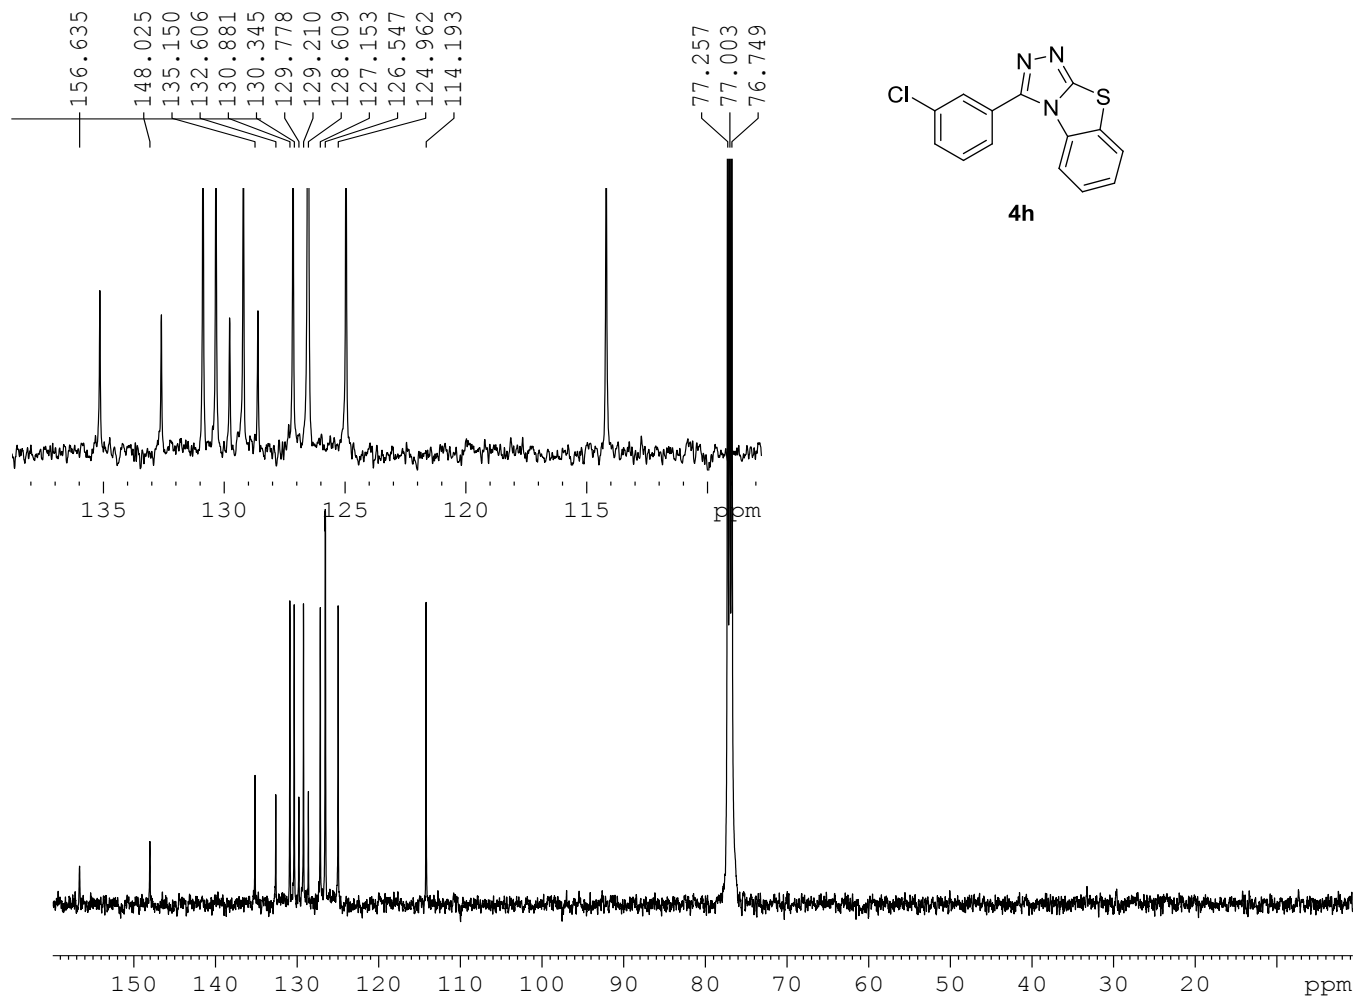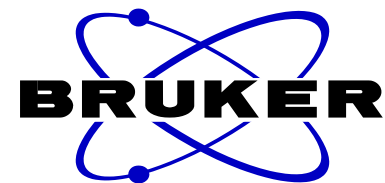

NAME LM-2-13B  
EXPNO 2  
PROCNO 1  
Date\_ 20120414  
Time\_ 13.31  
INSTRUM av500  
PROBHD 5 mm PABBO BB-  
PULPROG zgpg30  
TD 65536  
SOLVENT CDCl3  
NS 1214  
DS 2  
SWH 32679.738 Hz  
FIDRES 0.498653 Hz  
AQ 1.0027661 sec  
RG 812  
DW 15.300 usec  
DE 6.00 usec  
TE 296.1 K  
D1 2.00000000 sec  
d11 0.03000000 sec  
DELTA 1.89999998 sec  
TD0 1

=====  
CHANNEL f1  
NUC1 13C  
P1 9.60 usec  
PL1 2.00 dB  
SFO1 125.7464750 MHz

=====  
CHANNEL f2  
CPDPRG2 waltz16  
NUC2 1H  
PCPD2 80.00 usec  
PL2 2.60 dB  
PL12 17.66 dB  
PL13 17.66 dB  
SFO2 500.0355000 MHz  
SI 32768  
SF 125.7326482 MHz  
WDW EM  
SSB 0  
LB 5.00 Hz  
GB 0  
PC 2.00

LM-2-15B 1H 2012 04 12

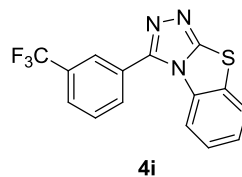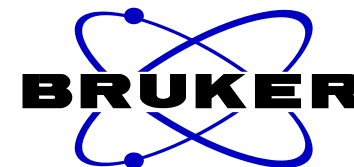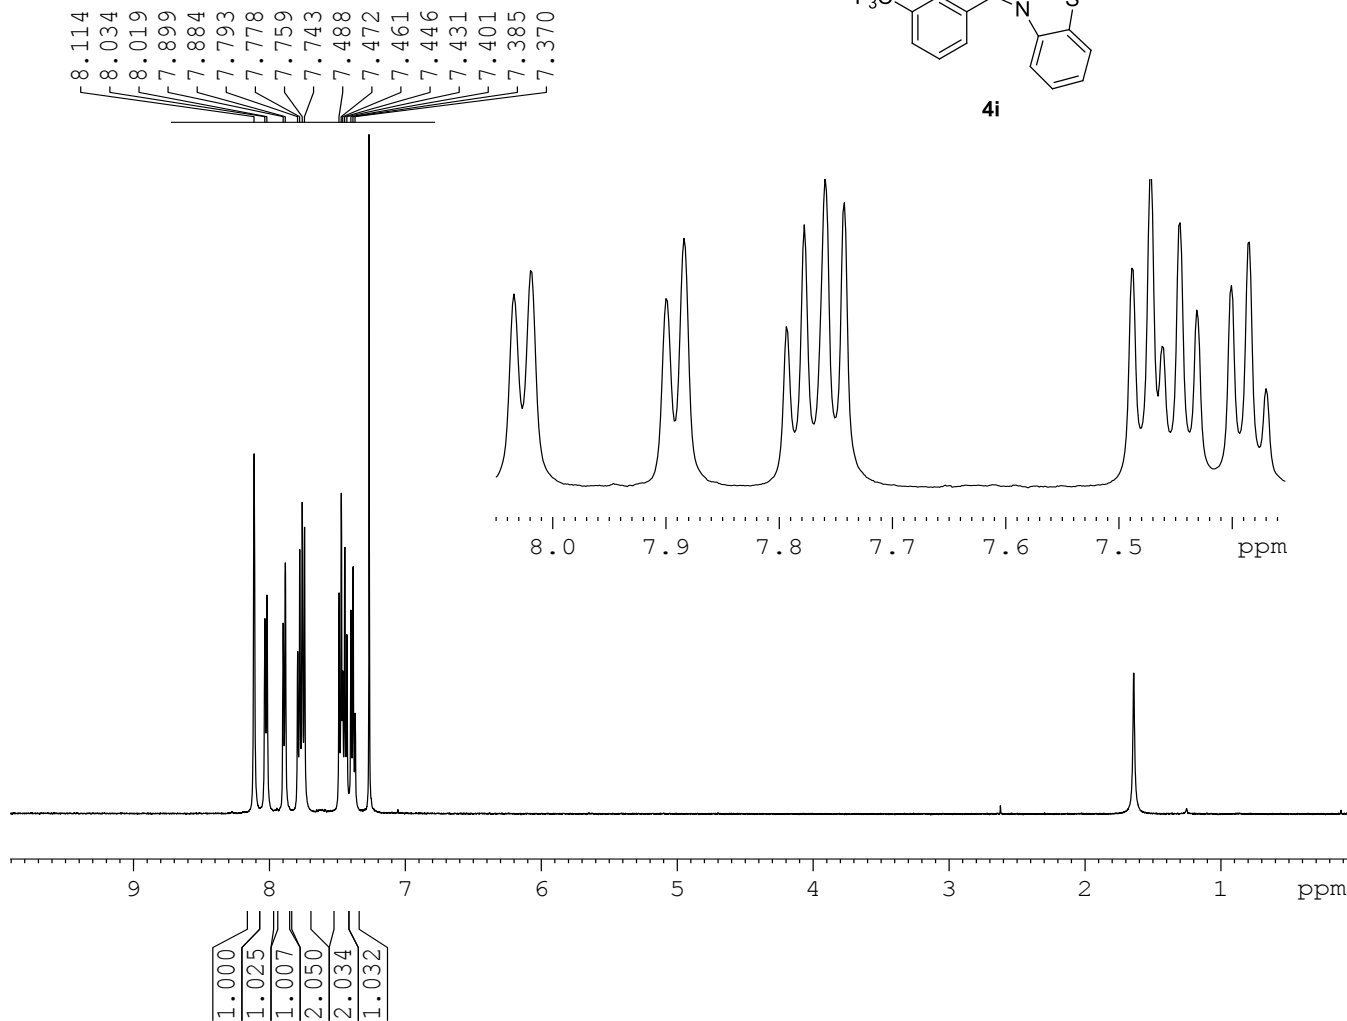

NAME LM-2-15B  
EXPNO 1  
PROCNO 1  
Date\_ 20120412  
Time\_ 10.14  
INSTRUM av500  
PROBHD 5 mm PABBO BB-  
PULPROG zg30  
TD 32768  
SOLVENT CDCl3  
NS 8  
DS 1  
SWH 10000.000 Hz  
FIDRES 0.305176 Hz  
AQ 1.6385000 sec  
RG 645  
DW 50.000 usec  
DE 6.00 usec  
TE 293.1 K  
D1 2.00000000 sec  
TD0 1

==== CHANNEL f1 =====  
NUC1 1H  
P1 13.50 usec  
PL1 2.20 dB  
SFO1 500.0335010 MHz  
SI 16384  
SF 500.0300064 MHz  
WDW EM  
SSB 0  
LB 0.30 Hz  
GB 0  
PC 2.00

LM-2-15B 13C 1D 2012 04 14

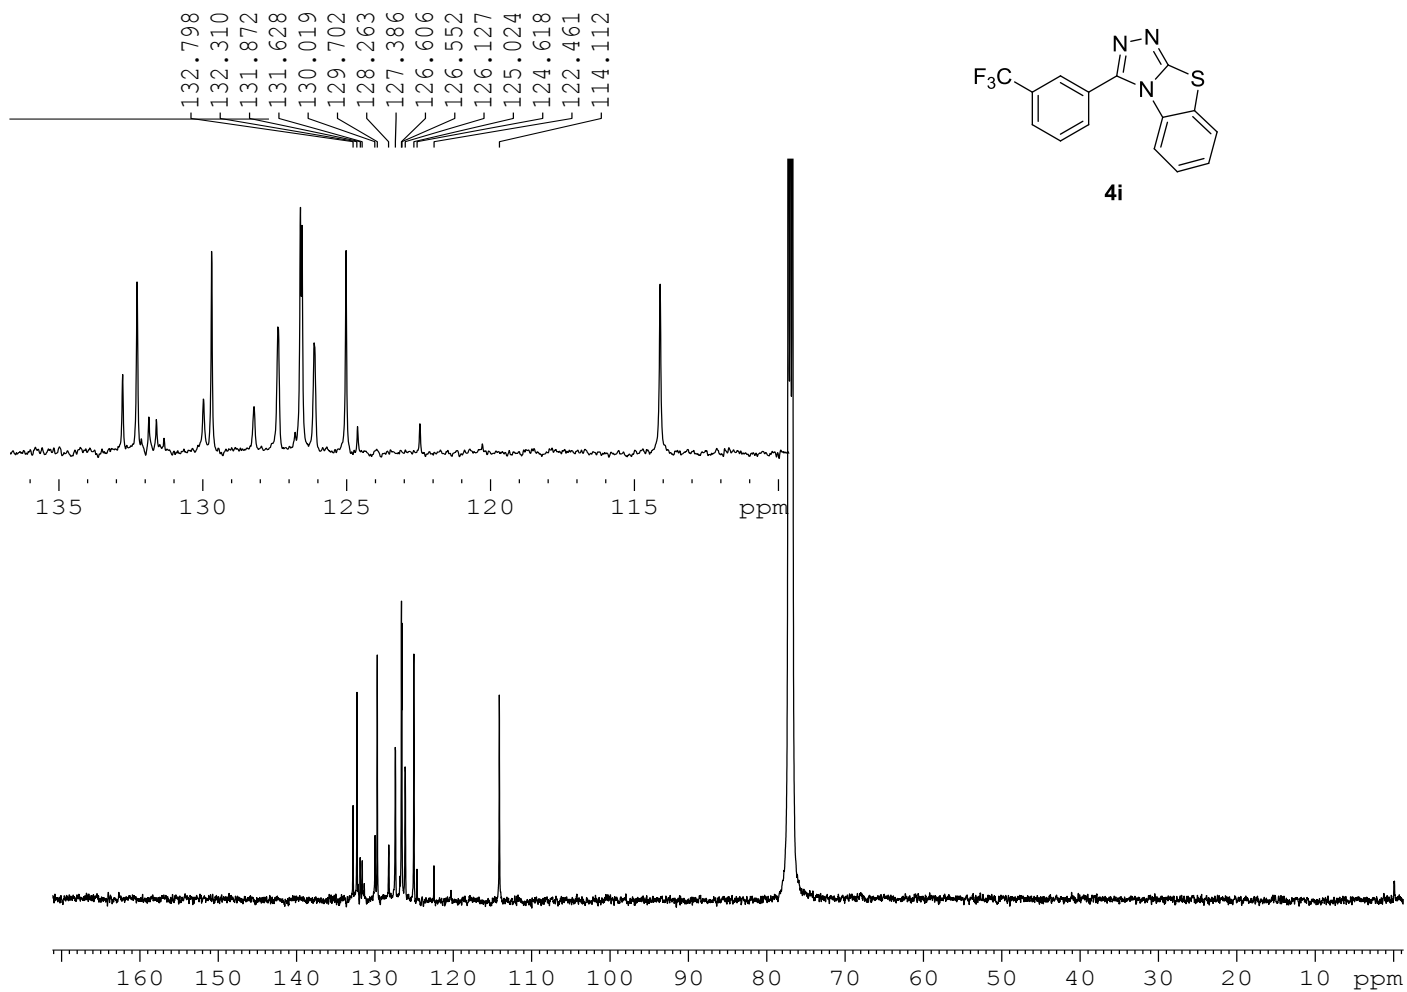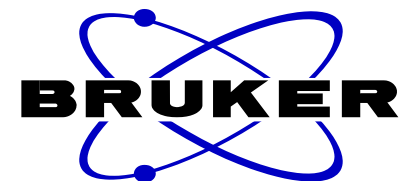

```
NAME LM-2-15B
EXPNO 2
PROCNO 1
Date_ 20120415
Time_ 6.58
INSTRUM av500
PROBHD 5 mm PABBO BB-
PULPROG zgpg30
TD 65536
SOLVENT CDCl3
NS 10716
DS 2
SWH 32679.738 Hz
FIDRES 0.498653 Hz
AQ 1.0027661 sec
RG 812
DW 15.300 usec
DE 6.00 usec
TE 298.1 K
D1 2.0000000 sec
d11 0.0300000 sec
DELTA 1.89999998 sec
TD0 1

===== CHANNEL f1 =====
NUC1 13C
P1 9.60 usec
PL1 2.00 dB
SFO1 125.7464750 MHz

===== CHANNEL f2 =====
CPDPRG2 waltz16
NUC2 1H
PCPD2 80.00 usec
PL2 2.60 dB
PL12 17.66 dB
PL13 17.66 dB
SFO2 500.0355000 MHz
SI 32768
SF 125.7326482 MHz
WDW EM
SSB 0
LB 5.00 Hz
GB 0
PC 2.00
```

LM-2-16B 1H 2012 04 17

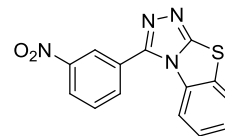

4j

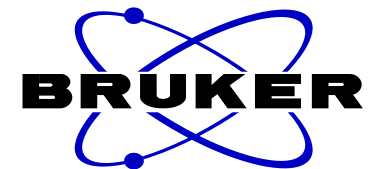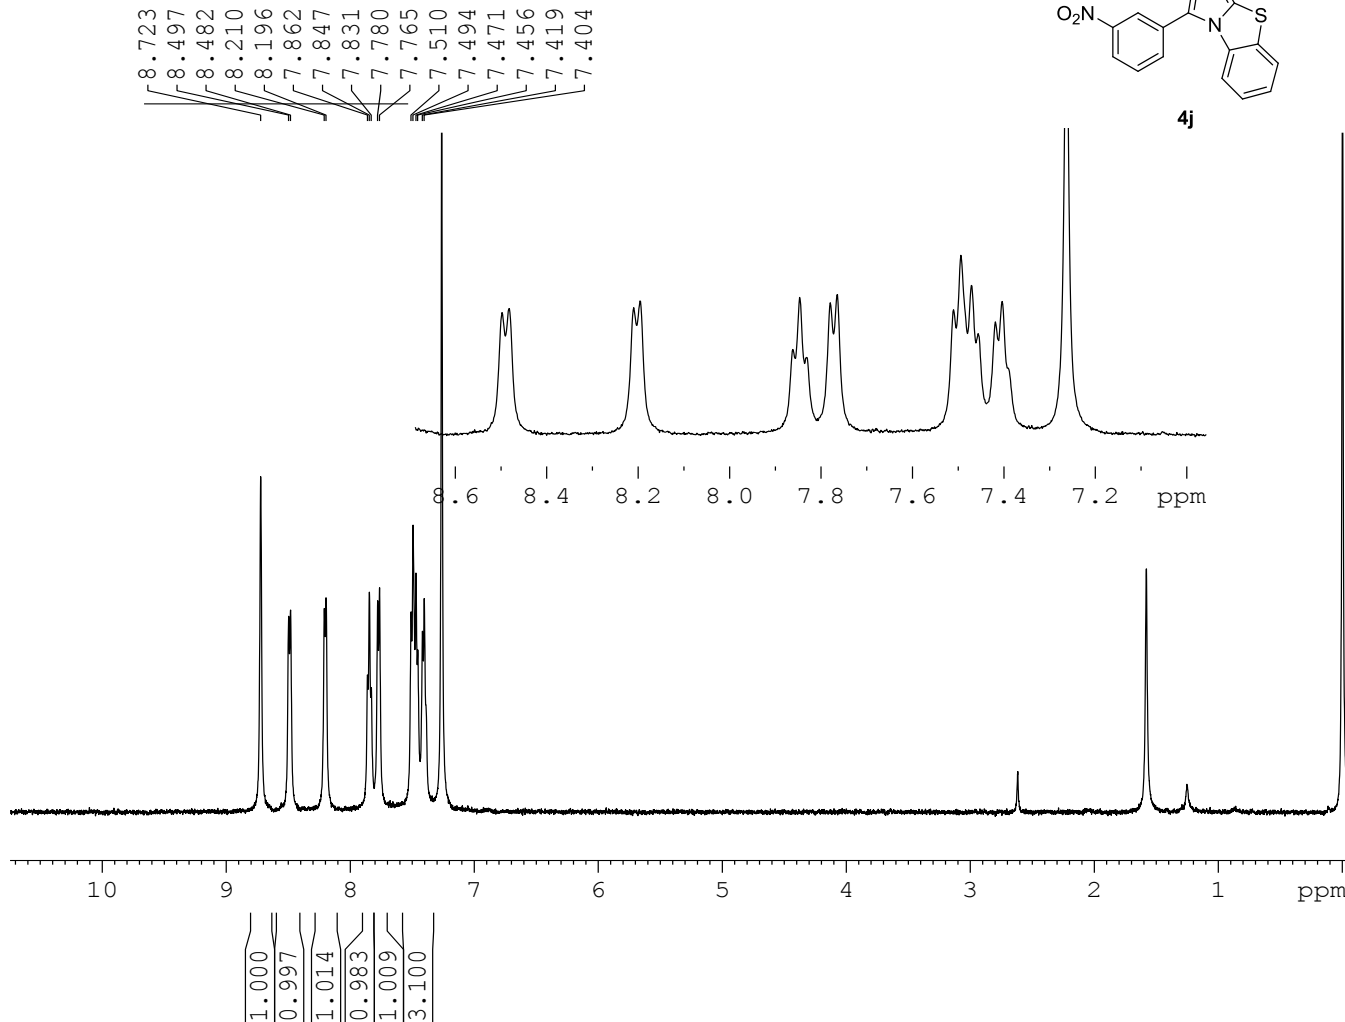

NAME LM-2-16B  
EXPNO 1  
PROCNO 1  
Date\_ 20120417  
Time\_ 16.53  
INSTRUM av500  
PROBHD 5 mm PABBO BB-  
PULPROG zg30  
TD 32768  
SOLVENT CDCl3  
NS 8  
DS 1  
SWH 10000.000 Hz  
FIDRES 0.305176 Hz  
AQ 1.6385000 sec  
RG 645  
DW 50.000 usec  
DE 6.00 usec  
TE 294.6 K  
D1 2.00000000 sec  
TD0 1

===== CHANNEL f1 =====  
NUC1 1H  
P1 13.50 usec  
PL1 2.20 dB  
SFO1 500.0335010 MHz  
SI 16384  
SF 500.0300072 MHz  
WDW EM  
SSB 0  
LB 0.30 Hz  
GB 0  
PC 2.00

LM-2-16B 13C 1D 2012 04 19

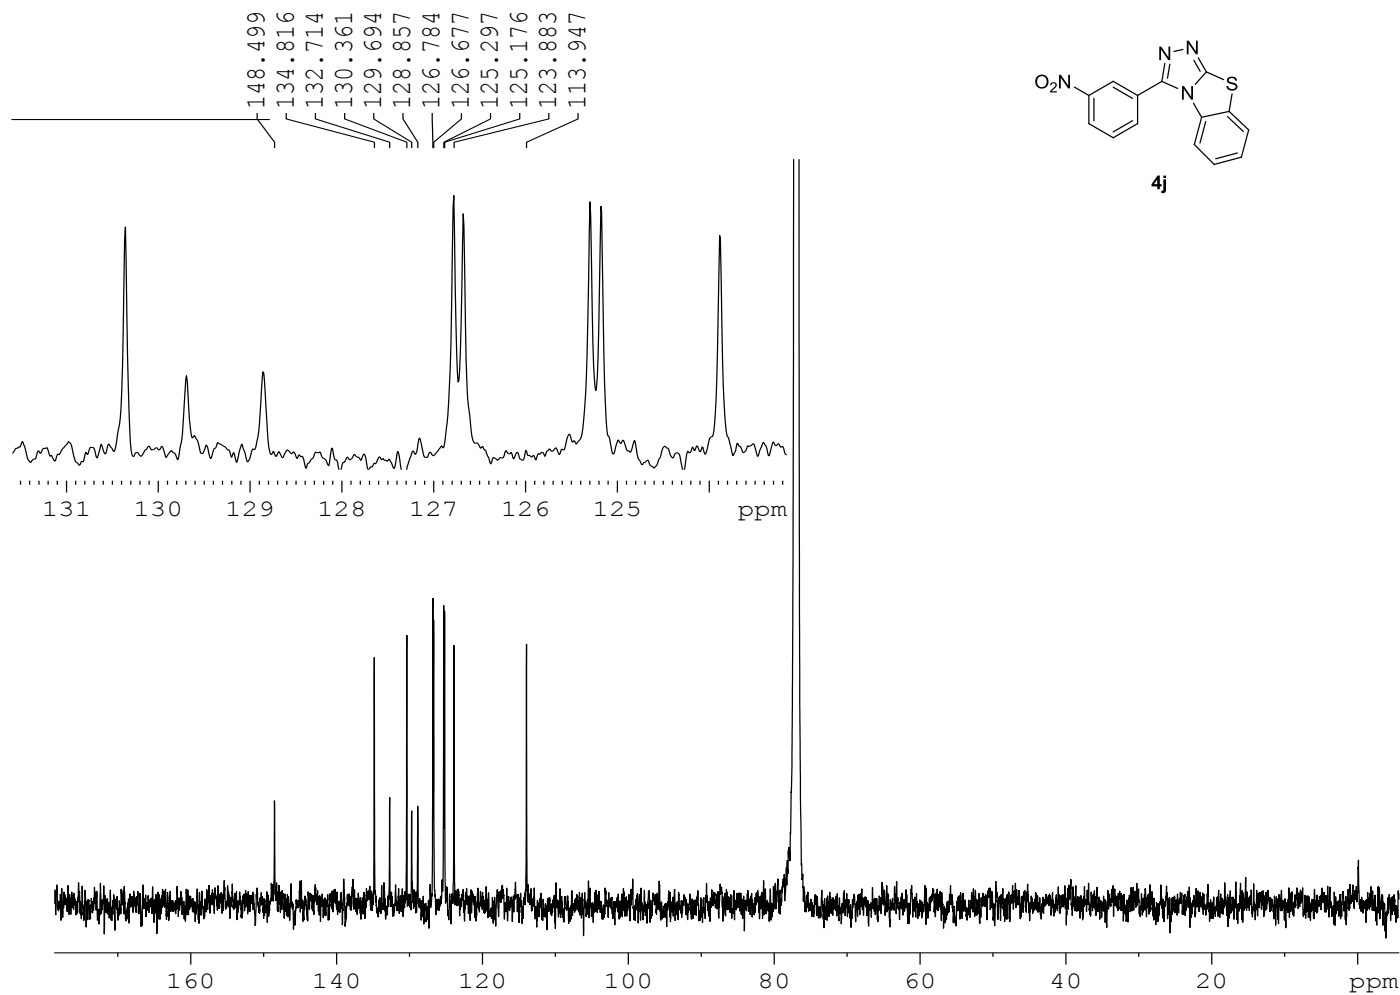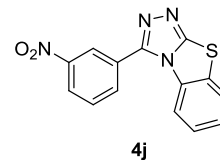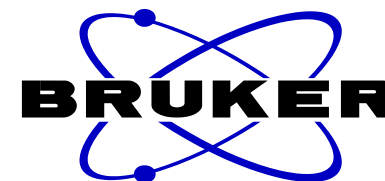

NAME LM-2-16B  
EXPNO 2  
PROCNO 1  
Date\_ 20120419  
Time\_ 11.24  
INSTRUM av500  
PROBHD 5 mm PABBO BB-  
PULPROG zgpg30  
TD 65536  
SOLVENT CDCl3  
NS 4298  
DS 2  
SWH 32679.738 Hz  
FIDRES 0.498653 Hz  
AQ 1.0027661 sec  
RG 812  
DW 15.300 usec  
DE 6.00 usec  
TE 298.2 K  
D1 2.0000000 sec  
d11 0.0300000 sec  
DELTA 1.89999998 sec  
TD0 1

==== CHANNEL f1 =====  
NUC1 13C  
P1 9.60 usec  
PL1 2.00 dB  
SFO1 125.7464750 MHz

==== CHANNEL f2 =====  
CPDPRG2 waltz16  
NUC2 1H  
PCPD2 80.00 usec  
PL2 2.60 dB  
PL12 17.66 dB  
PL13 17.66 dB  
SFO2 500.0355000 MHz  
SI 32768  
SF 125.7326482 MHz  
WDW EM  
SSB 0  
LB 5.00 Hz  
GB 0  
PC 2.00



LM-2-8B 1H 2012 05 07

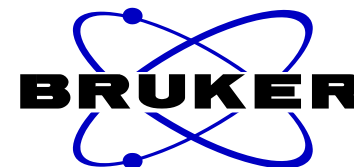

7.827  
7.812  
7.716  
7.700  
7.670  
7.667  
7.655  
7.653  
7.572  
7.558  
7.542  
7.526  
7.511  
7.411  
7.396  
7.381  
7.326  
7.311  
7.295  
7.038  
7.021

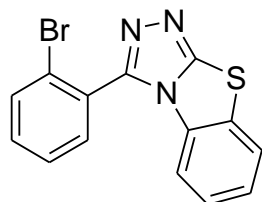

4k

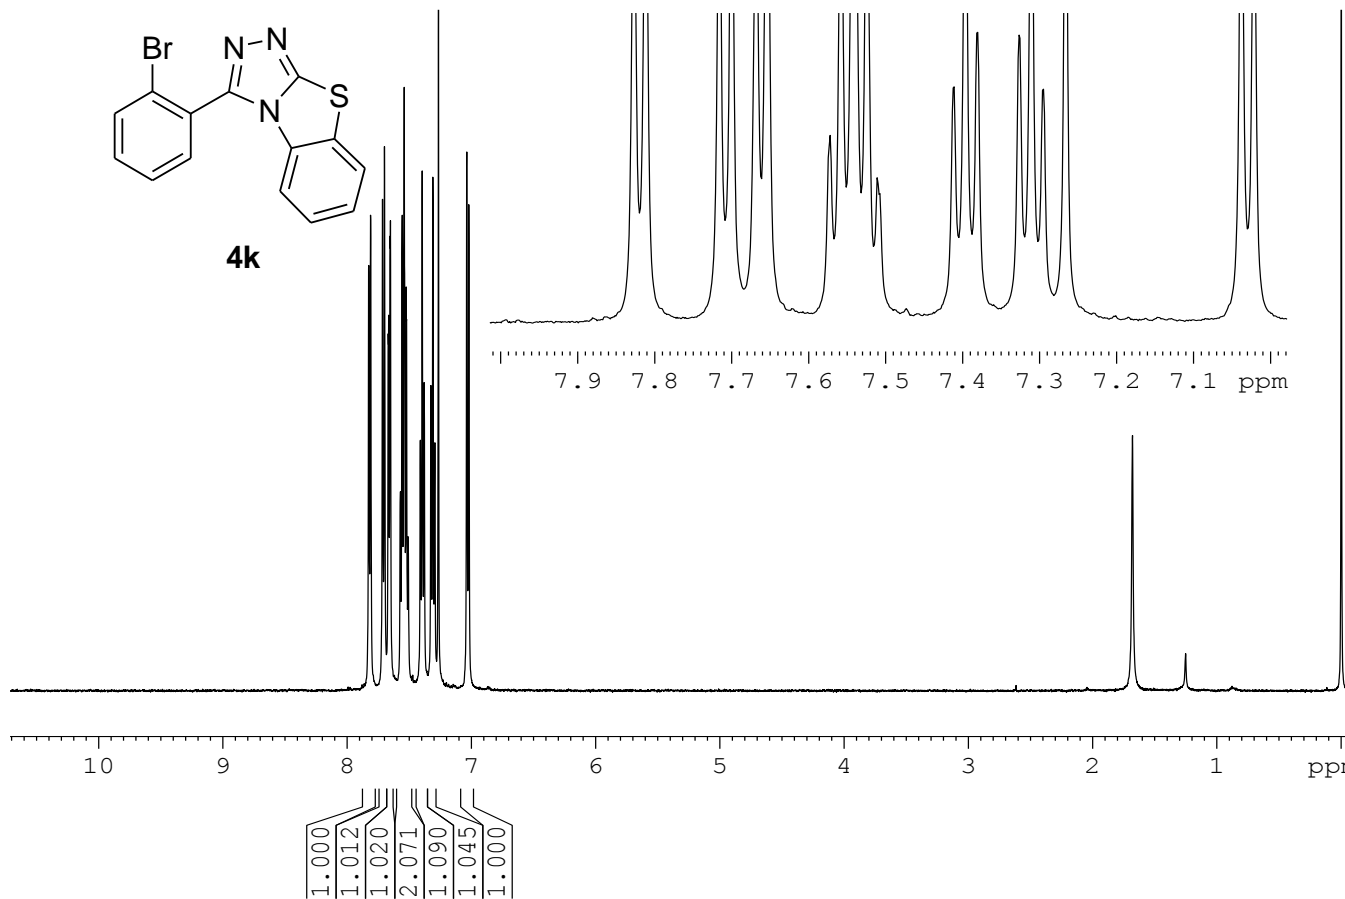

NAME LM-2-8B  
EXPNO 1  
PROCNO 1  
Date\_ 20120507  
Time\_ 21.54  
INSTRUM av500  
PROBHD 5 mm PABBO BB-  
PULPROG zg30  
TD 32768  
SOLVENT CDCl3  
NS 8  
DS 1  
SWH 10000.000 Hz  
FIDRES 0.305176 Hz  
AQ 1.6385000 sec  
RG 645  
DW 50.000 usec  
DE 6.00 usec  
TE 295.5 K  
D1 2.00000000 sec  
TDO 1

==== CHANNEL f1 =====  
NUC1 1H  
P1 13.50 usec  
PL1 2.20 dB  
SFO1 500.0335010 MHz  
SI 16384  
SF 500.0300081 MHz  
WDW EM  
SSB 0  
LB 0.30 Hz  
GB 0  
PC 2.00

LM-2-8B 13C 1D 2012 05 09

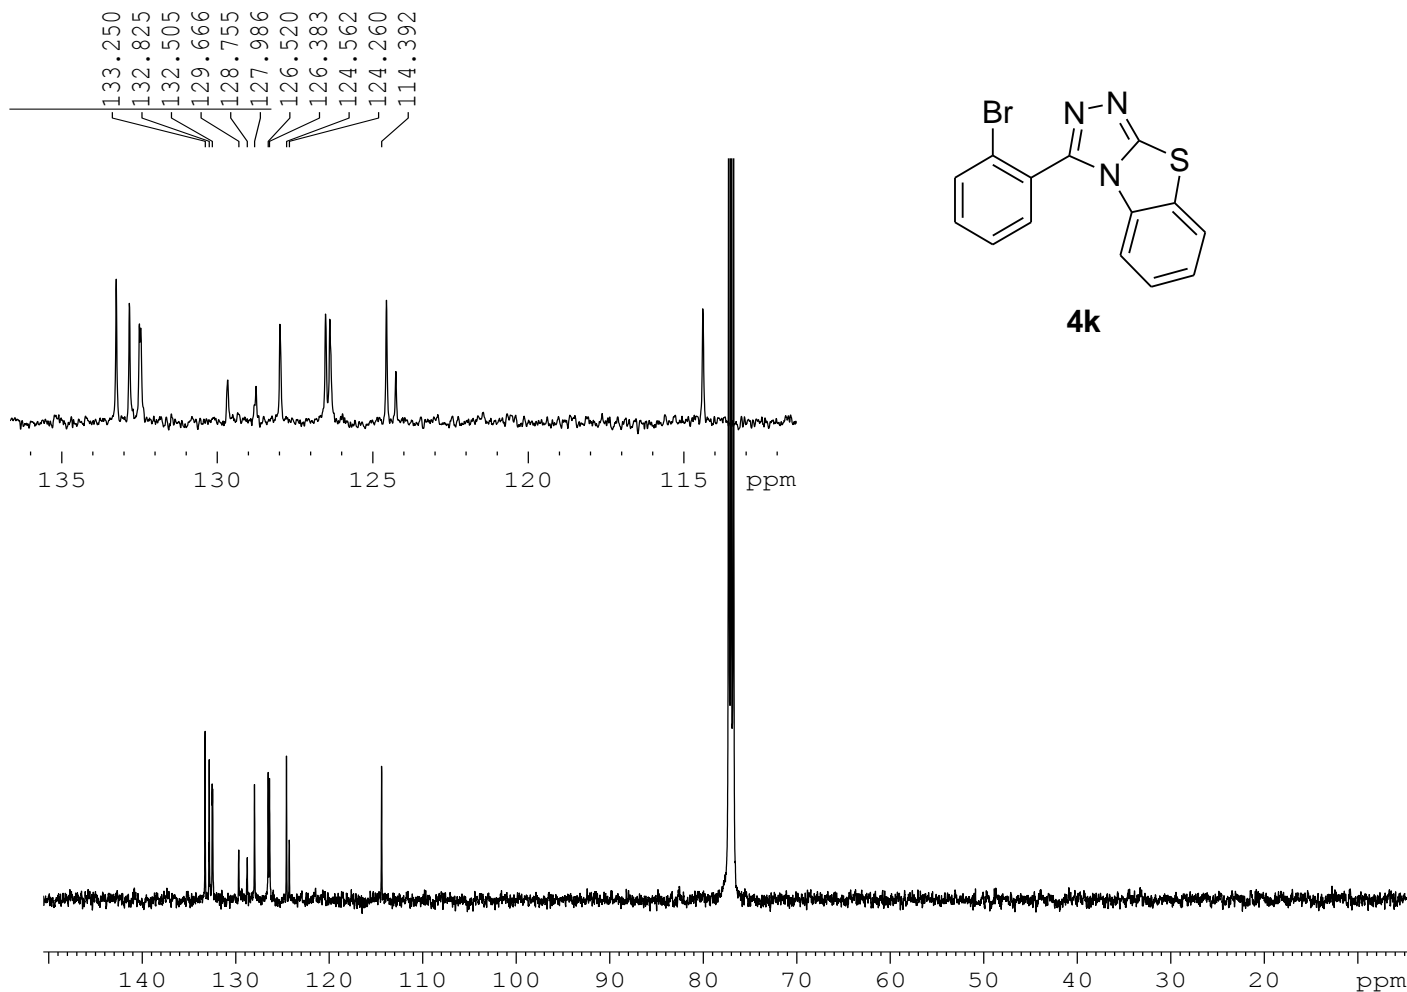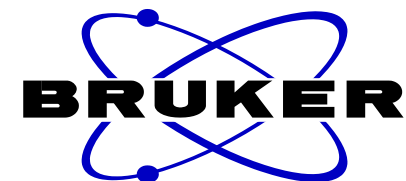

```
NAME LM-2-8B
EXPNO 2
PROCNO 1
Date_ 20120509
Time_ 18.45
INSTRUM av500
PROBHD 5 mm PABBO BB-
PULPROG zgpg30
TD 65536
SOLVENT CDCl3
NS 612
DS 2
SWH 32679.738 Hz
FIDRES 0.498653 Hz
AQ 1.0027661 sec
RG 11500
DW 15.300 usec
DE 6.00 usec
TE 301.7 K
D1 2.00000000 sec
d11 0.03000000 sec
DELTA 1.89999998 sec
TD0 1

===== CHANNEL f1 =====
NUC1 13C
P1 9.60 usec
PL1 2.00 dB
SFO1 125.7464750 MHz

===== CHANNEL f2 =====
CPDPRG2 waltz16
NUC2 1H
PCPD2 80.00 usec
PL2 2.60 dB
PL12 17.66 dB
PL13 17.66 dB
SFO2 500.0355000 MHz
SI 32768
SF 125.7326440 MHz
WDW EM
SSB 0
LB 4.00 Hz
GB 0
PC 2.00
```

LM-2-17B 1H 2012 04 12

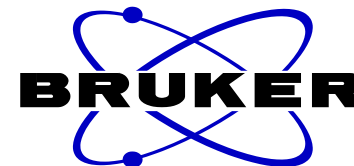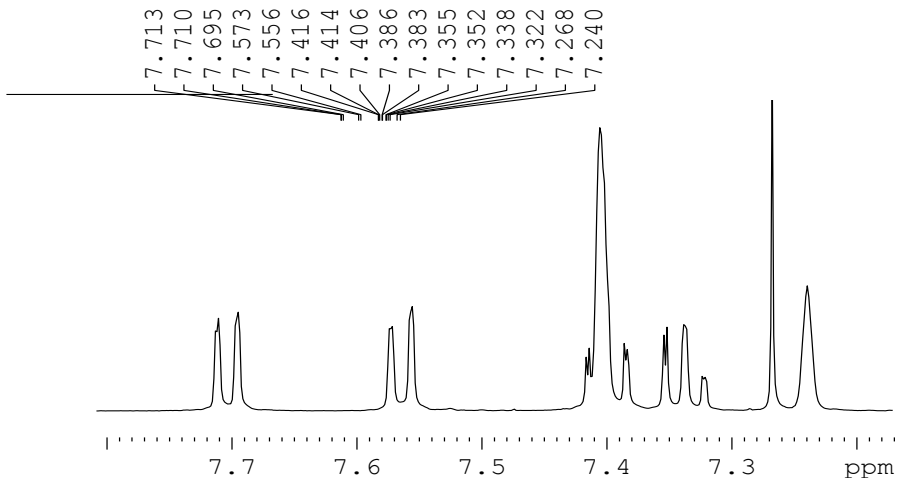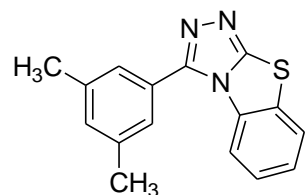

4I

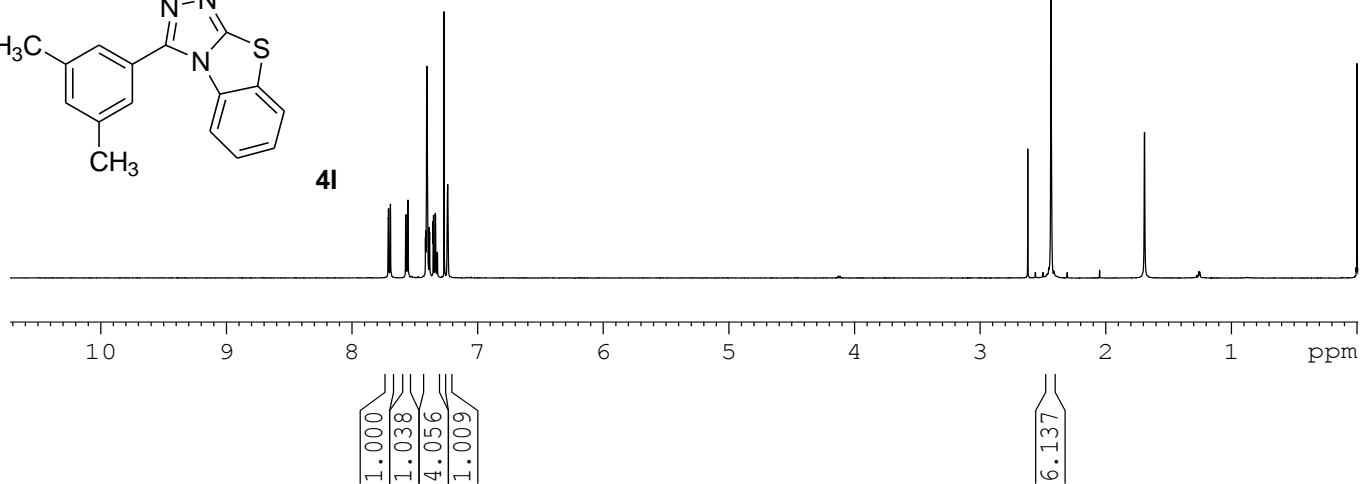

NAME LM-2-17B  
EXPNO 1  
PROCNO 1  
Date\_ 20120412  
Time\_ 10.18  
INSTRUM av500  
PROBHD 5 mm PABBO BB-  
PULPROG zg30  
TD 32768  
SOLVENT CDCl3  
NS 8  
DS 1  
SWH 10000.000 Hz  
FIDRES 0.305176 Hz  
AQ 1.6385000 sec  
RG 512  
DW 50.000 usec  
DE 6.00 usec  
TE 293.1 K  
D1 2.00000000 sec  
TDO 1

==== CHANNEL f1 =====  
NUC1 1H  
P1 13.50 usec  
PL1 2.20 dB  
SFO1 500.0335010 MHz  
SI 16384  
SF 500.0300064 MHz  
WDW EM  
SSB 0  
LB 0.30 Hz  
GB 0  
PC 2.00

LM-2-17B 13C 1D 2012 04 15

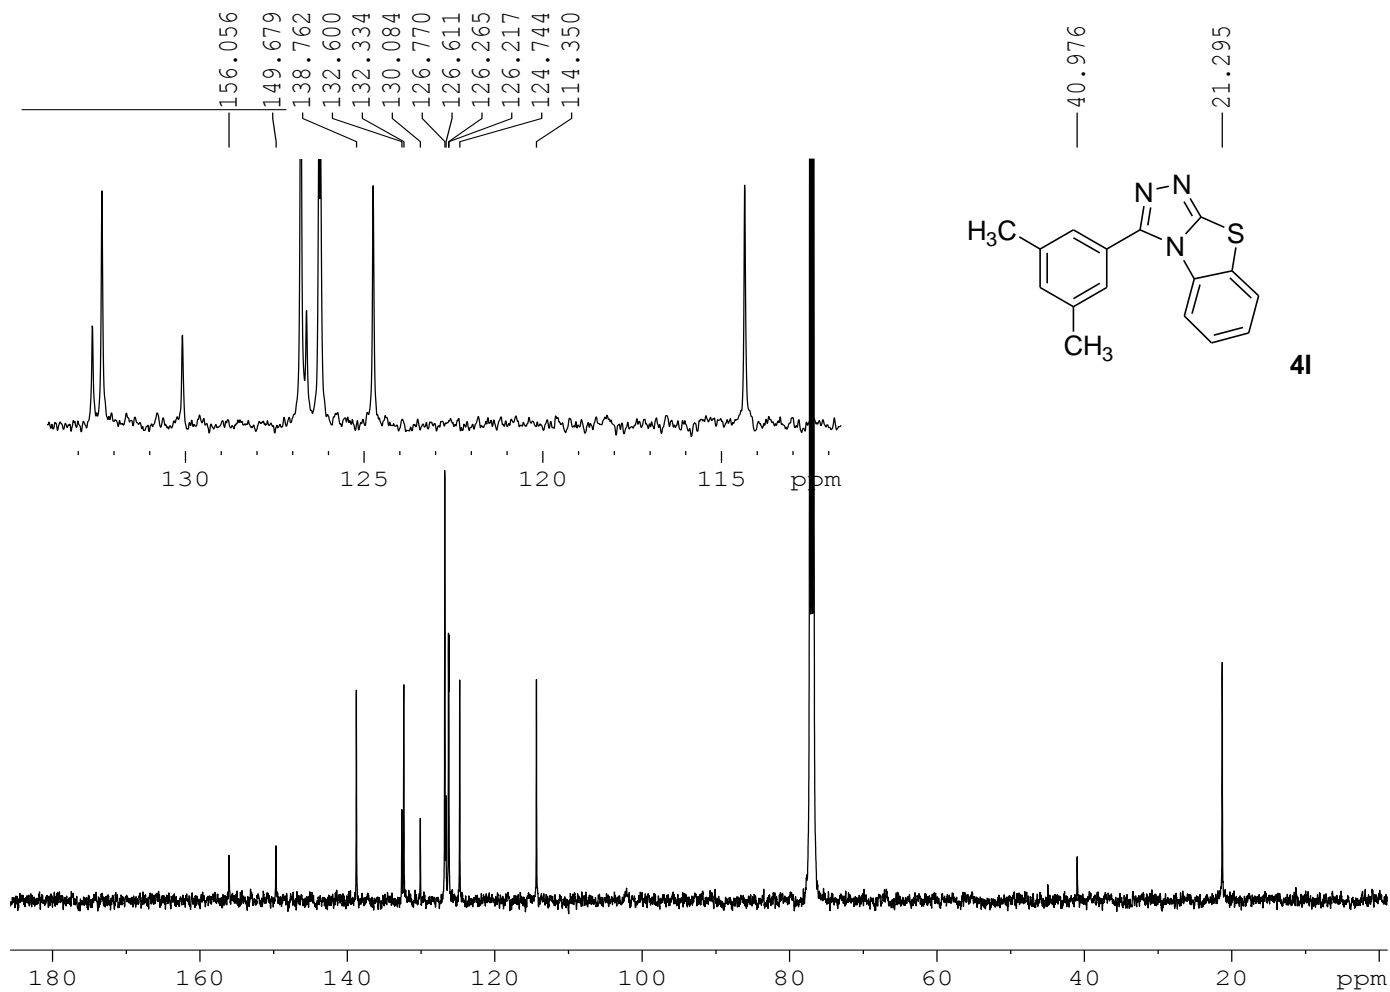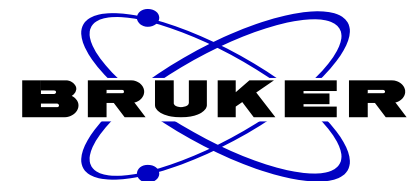

NAME LM-2-17B  
EXPNO 2  
PROCNO 1  
Date\_ 20120415  
Time\_ 18.47  
INSTRUM av500  
PROBHD 5 mm PABBO BB-  
PULPROG zgpg30  
TD 65536  
SOLVENT CDCl3  
NS 1713  
DS 2  
SWH 32679.738 Hz  
FIDRES 0.498653 Hz  
AQ 1.0027661 sec  
RG 812  
DW 15.300 usec  
DE 6.00 usec  
TE 296.5 K  
D1 2.00000000 sec  
d11 0.03000000 sec  
DELTA 1.89999998 sec  
TD0 1

==== CHANNEL f1 =====  
NUC1 13C  
P1 9.60 usec  
PL1 2.00 dB  
SFO1 125.7464750 MHz

==== CHANNEL f2 =====  
CPDPRG2 waltz16  
NUC2 1H  
PCPD2 80.00 usec  
PL2 2.60 dB  
PL12 17.66 dB  
PL13 17.66 dB  
SFO2 500.0355000 MHz  
SI 32768  
SF 125.7326482 MHz  
WDW EM  
SSB 0  
LB 5.00 Hz  
GB 0  
PC 2.00

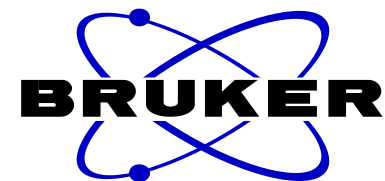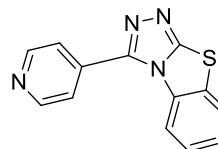

4m

8.906  
8.897  
7.761  
7.752  
7.745  
7.616  
7.600  
7.473  
7.458  
7.442  
7.420  
7.405  
7.390  
7.259

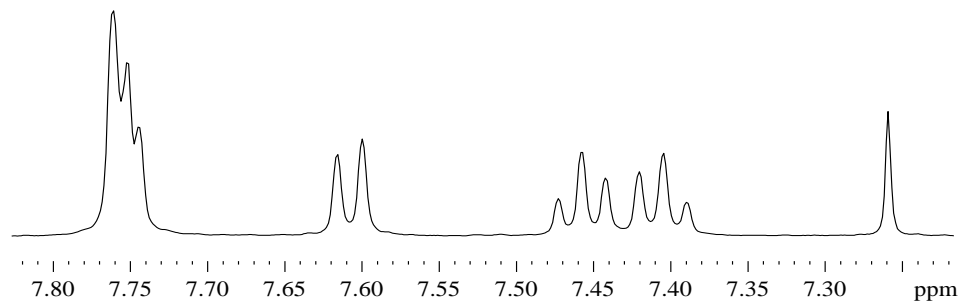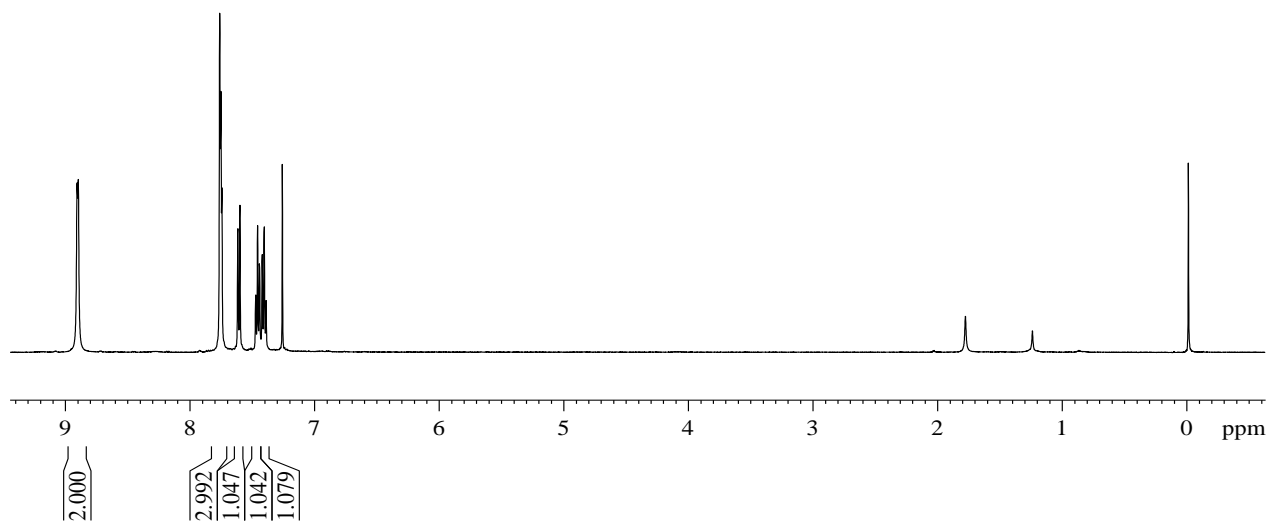

NAME LM-2-18B-2  
EXPNO 1  
PROCNO 1  
Date\_ 20121207  
Time 19.13  
INSTRUM spect  
PROBHD 5 mm PABBO BB-  
PULPROG zg30  
TD 16384  
SOLVENT CDCl3  
NS 8  
DS 1  
SWH 10000.000 Hz  
FIDRES 0.610352 Hz  
AQ 0.8193000 sec  
RG 645  
DW 50.000 usec  
DE 8.00 usec  
TE 292.4 K  
D1 1.00000000 sec  
TD0 1

===== CHANNEL f1 =====  
NUC1 1H  
P1 13.00 usec  
PL1 2.00 dB  
SFO1 500.0338500 MHz  
SI 16384  
SF 500.0300092 MHz  
WDW EM  
SSB 0  
LB 0.30 Hz  
GB 0  
PC 5.00

LM-2-18B-2 13C 1D 2012 12 12

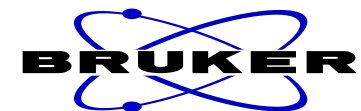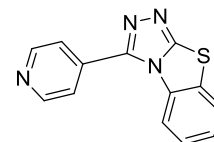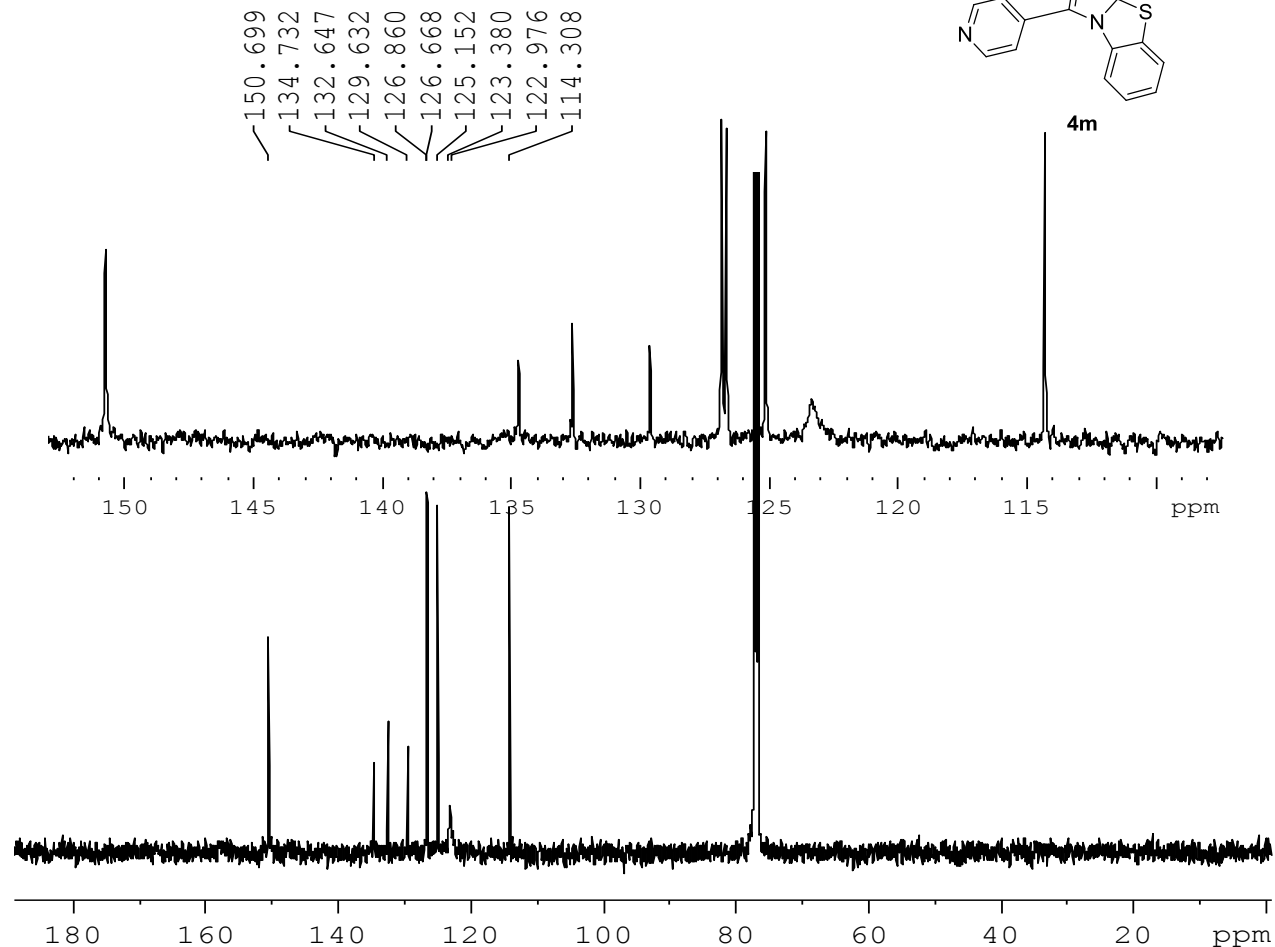

NAME LM-2-18B-2  
EXPNO 2  
PROCNO 1  
Date\_ 20121212  
Time\_ 12.15  
INSTRUM spect  
PROBHD 5 mm PABBO BB-  
PULPROG zgpg30  
TD 65536  
SOLVENT CDC13  
NS 556  
DS 2  
SWH 32679.738 Hz  
FIDRES 0.498653 Hz  
AQ 1.0027661 sec  
RG 1150  
DW 15.300 usec  
DE 6.00 usec  
TE 292.4 K  
D1 2.0000000 sec  
d11 0.0300000 sec  
DELTA 1.89999998 sec  
TD0 10

=====  
CHANNEL f1  
NUC1 13C  
P1 12.20 usec  
PL1 3.00 dB  
SFO1 125.7464750 MHz

=====  
CHANNEL f2  
CPDPRG2 waltz16  
NUC2 1H  
PCPD2 80.00 usec  
PL2 2.00 dB  
PL12 17.70 dB  
PL13 17.70 dB  
SFO2 500.0355000 MHz  
SI 32768  
SF 125.7326455 MHz  
WDW EM  
SSB 0  
--

LM-2-10B 1H 2012 03 29

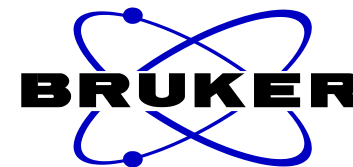

7.795  
7.792  
7.785  
7.782  
7.776  
7.765  
7.650  
7.647  
7.638  
7.633  
7.628  
7.625  
7.618  
7.615  
7.607  
7.605  
7.599  
7.596  
7.513  
7.504  
7.494  
7.486  
7.467  
7.449  
7.444  
7.434  
7.429  
7.074  
7.069  
7.057  
7.052  
7.040  
7.035

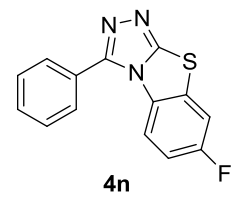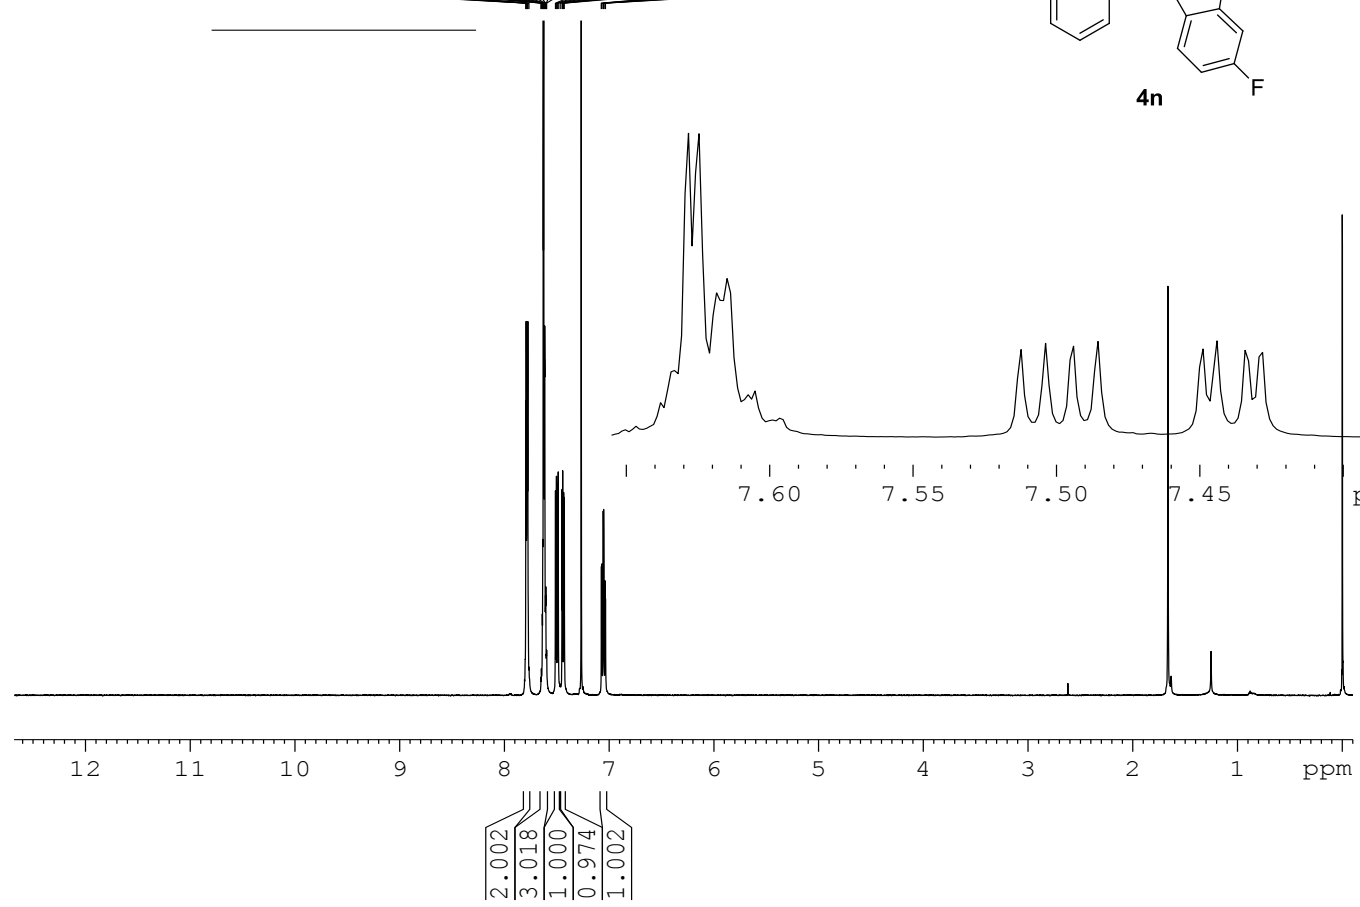

NAME LM-2-10B  
EXPNO 1  
PROCNO 1  
Date\_ 20120329  
Time\_ 19.18  
INSTRUM av500  
PROBHD 5 mm PABBO BB-  
PULPROG zg30  
TD 32768  
SOLVENT CDCl3  
NS 8  
DS 1  
SWH 10000.000 Hz  
FIDRES 0.305176 Hz  
AQ 1.6385000 sec  
RG 645  
DW 50.000 usec  
DE 6.00 usec  
TE 292.7 K  
D1 2.00000000 sec  
TD0 1

==== CHANNEL f1 =====  
NUC1 1H  
P1 13.50 usec  
PL1 2.20 dB  
SFO1 500.0335010 MHz  
SI 16384  
SF 500.0300068 MHz  
WDW EM  
SSB 0  
LB 0.30 Hz  
GB 0  
PC 2.00

LM-2-10B 13C 1D 2012 04 05

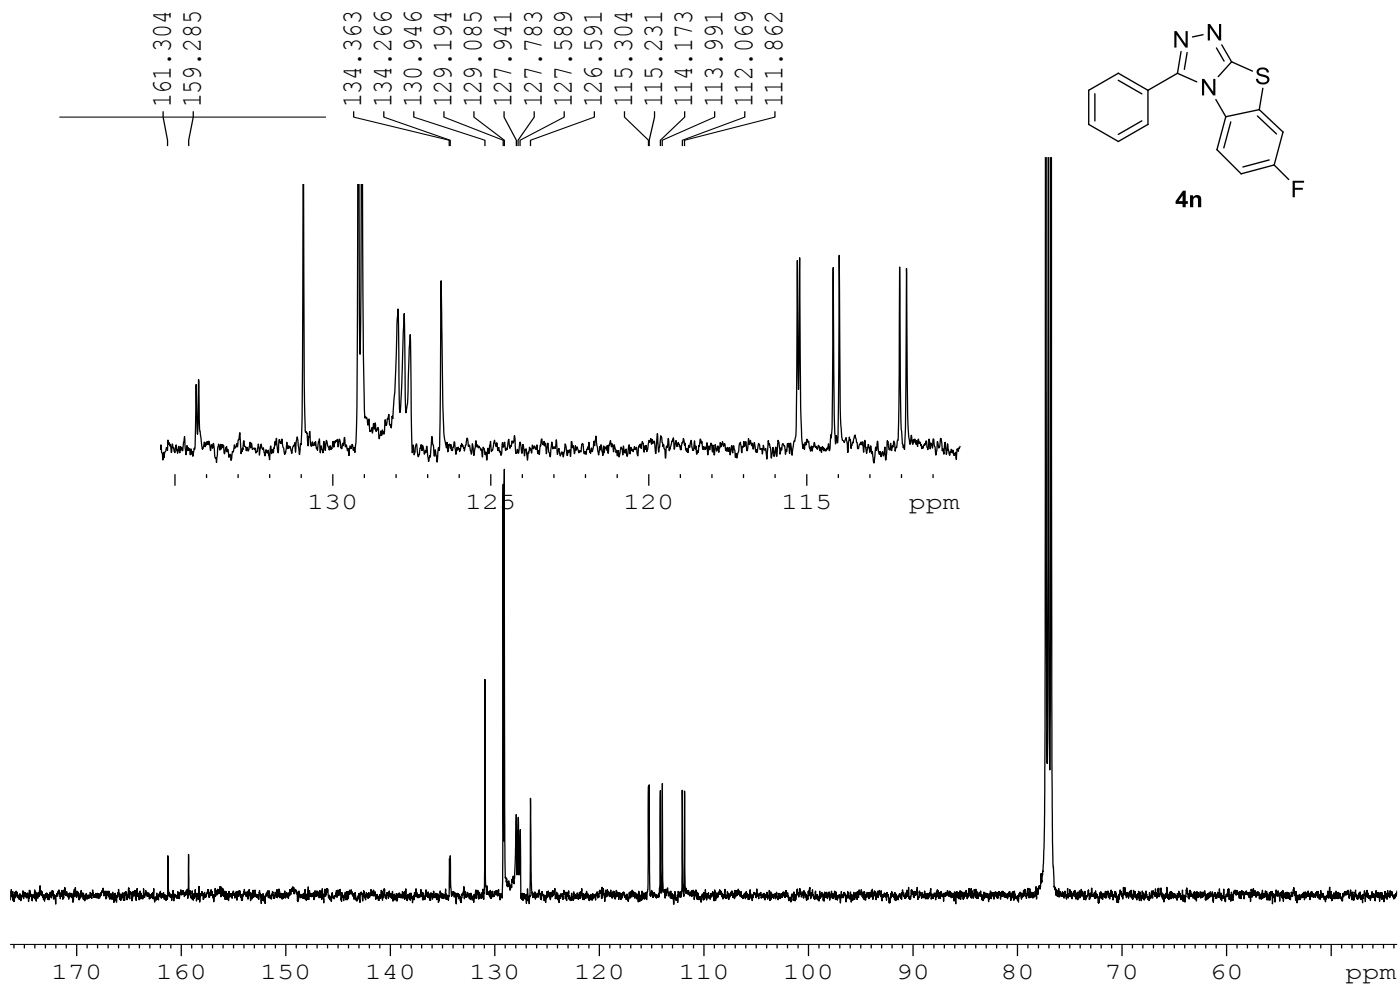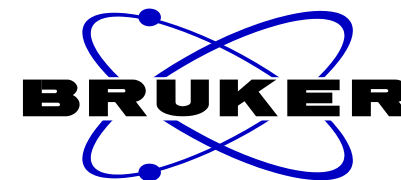

NAME LM-2-10B  
EXPNO 2  
PROCNO 11  
Date\_ 20120405  
Time\_ 10.43  
INSTRUM av500  
PROBHD 5 mm PABBO BB-  
PULPROG zgpg30  
TD 65536  
SOLVENT CDC13  
NS 2203  
DS 2  
SWH 32679.738 Hz  
FIDRES 0.498653 Hz  
AQ 1.0027661 sec  
RG 3250  
DW 15.300 usec  
DE 6.00 usec  
TE 294.1 K  
D1 2.00000000 sec  
d11 0.03000000 sec  
DELTA 1.899999998 sec  
TDO 1

==== CHANNEL f1 =====  
NUC1 13C  
P1 9.60 usec  
PL1 2.00 dB  
SFO1 125.7464750 MHz

==== CHANNEL f2 =====  
CPDPRG2 waltz16  
NUC2 1H  
PCPD2 80.00 usec  
PL2 2.20 dB  
PL12 17.66 dB  
PL13 17.66 dB  
SFO2 500.0355000 MHz  
SI 32768  
SF 125.7326435 MHz  
WDW EM  
SSB 0  
LB 3.00 Hz  
GB 0  
PC 2.00



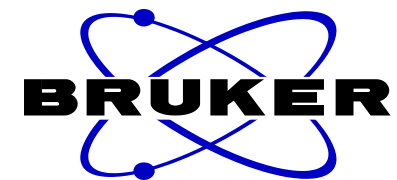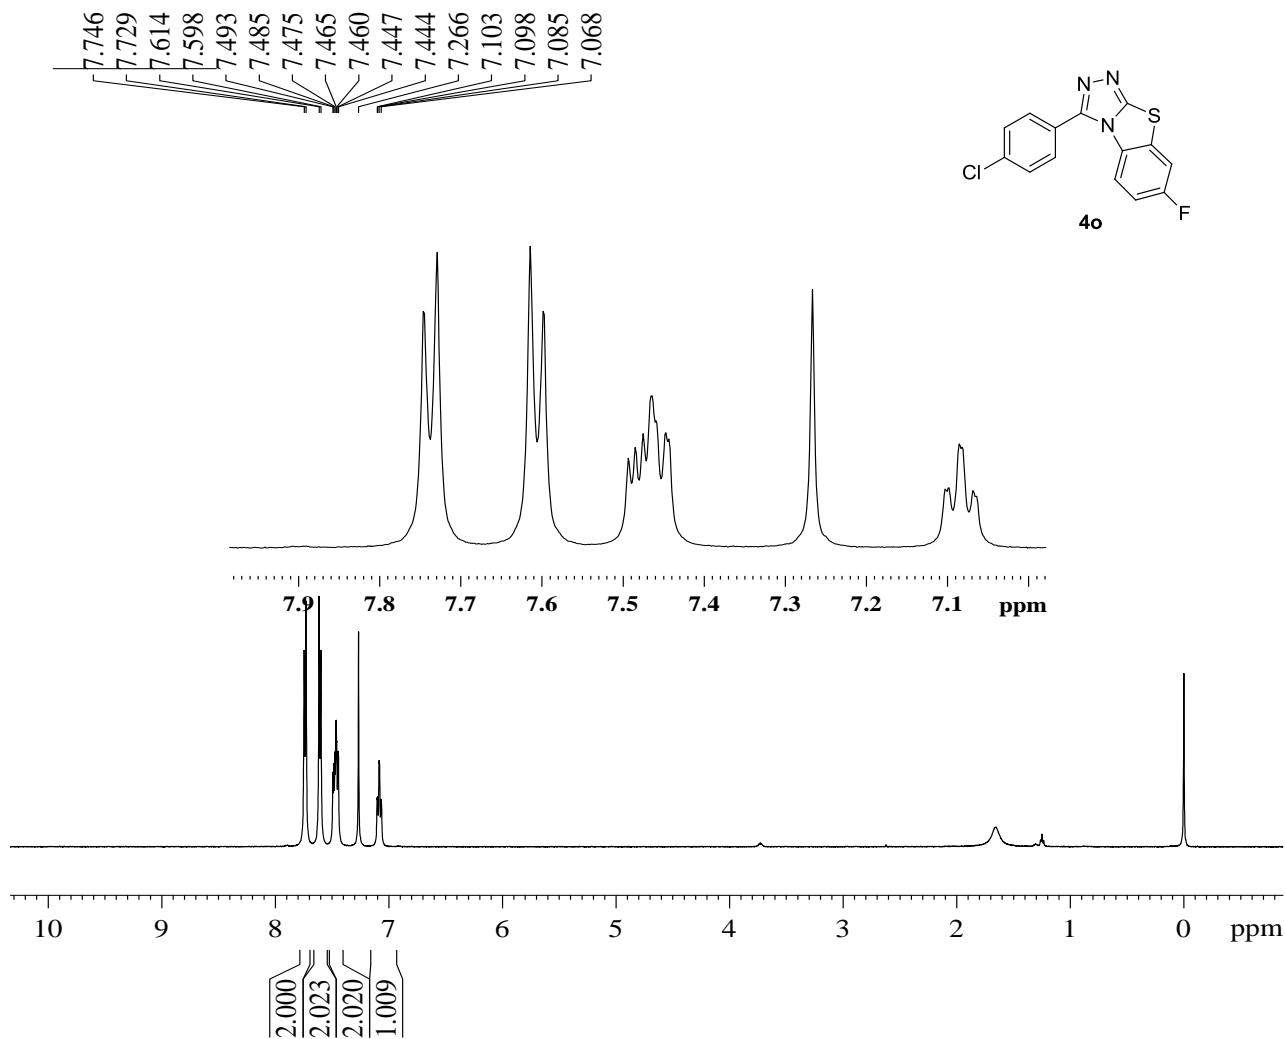

NAME LM-2-11B  
EXPNO 1  
PROCNO 1  
Date\_ 20120329  
Time 19.22  
INSTRUM av500  
PROBHD 5 mm PABBO BB-  
PULPROG zg30  
TD 32768  
SOLVENT CDCl3  
NS 8  
DS 1  
SWH 10000.000 Hz  
FIDRES 0.305176 Hz  
AQ 1.6385000 sec  
RG 645  
DW 50.000 usec  
DE 6.00 usec  
TE 292.7 K  
D1 2.00000000 sec  
TD0 1

===== CHANNEL f1 =====  
NUC1 1H  
P1 13.50 usec  
PL1 2.20 dB  
SFO1 500.0335010 MHz  
SI 16384  
SF 500.0300064 MHz  
WDW EM  
SSB 0  
LB 0.30 Hz  
GB 0  
PC 2.00

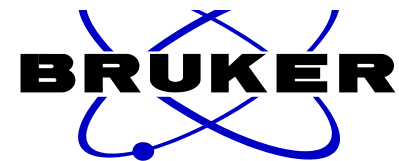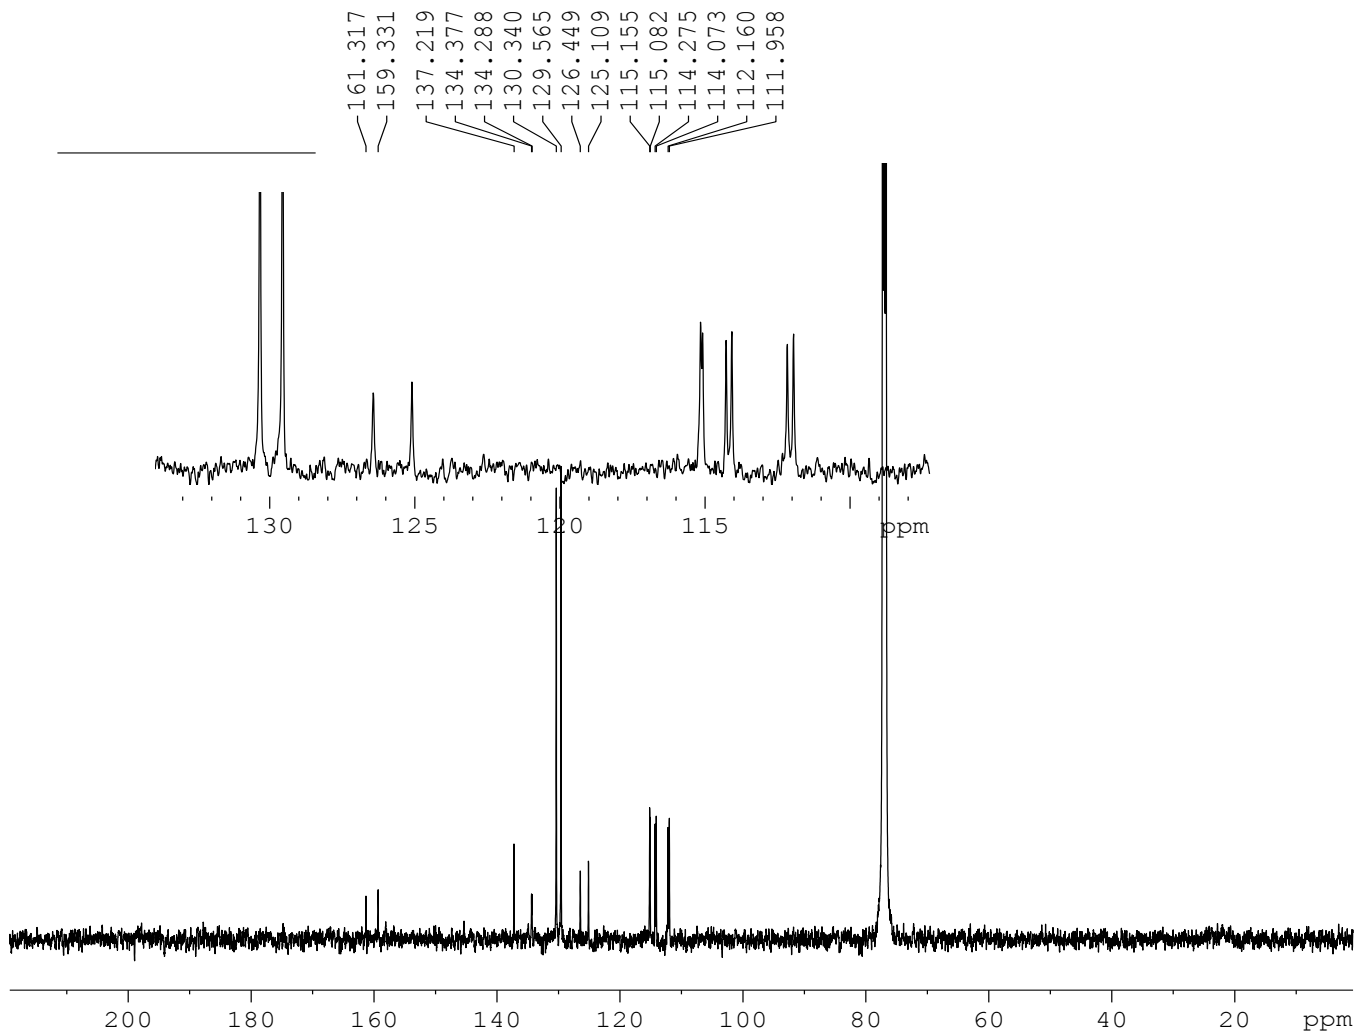

```
NAME          LM-2-11B
EXPNO         2
PROCNO       1
Date_        20120405
Time_        11.42
INSTRUM      av500
PROBHD       5 mm PABBO BB-
PULPROG      zgpg30
TD           65536
SOLVENT      CDC13
NS           3024
DS           2
SWH          32679.738 Hz
FIDRES       0.498653 Hz
AQ           1.0027661 sec
RG           3250
DW           15.300 usec
DE           6.00 usec
TE           293.4 K
D1           2.00000000 sec
d11          0.03000000 sec
DELTA        1.899999998 sec
TD0          1
```

```
===== CHANNEL f1 =====
NUC1          13C
P1            9.60 usec
PL1           2.00 dB
SFO1         125.7464750 MHz
```

```
===== CHANNEL f2 =====
CPDPRG2      waltz16
NUC2          1H
PCPD2        80.00 usec
PL2           2.60 dB
PL12         17.66 dB
PL13         17.66 dB
SFO2         500.0355000 MHz
SI           32768
SF           125.7326482 MHz
WDW          EM
SSB          0
LB           5.00 Hz
GB           0
PC           2.00
```

LM-2-14B 1H 2012 04 12

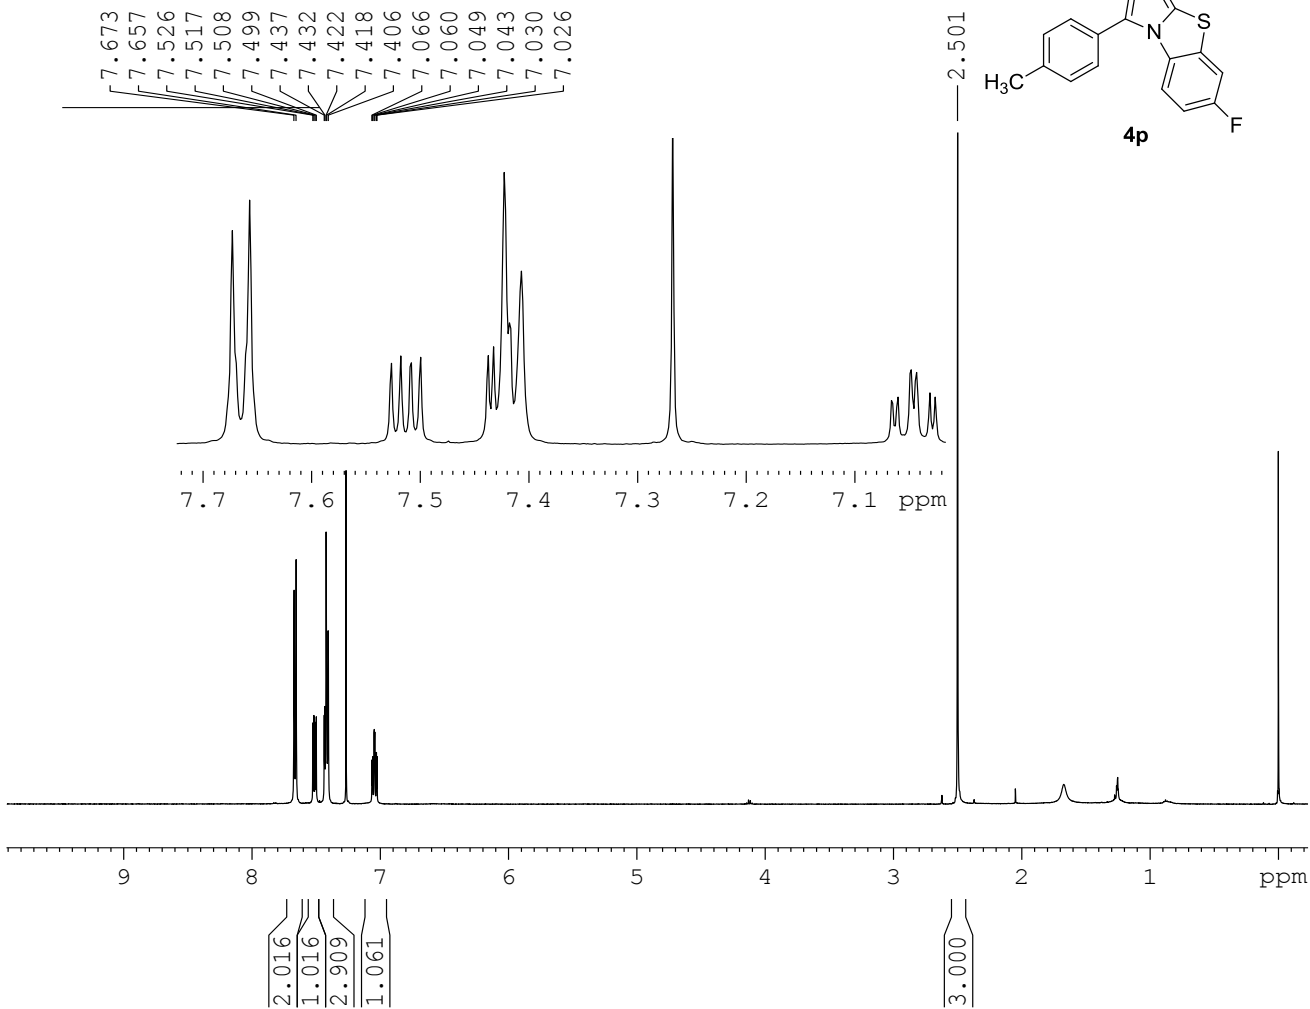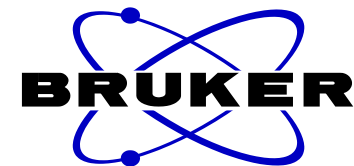

NAME LM-2-14B  
EXPNO 1  
PROCNO 1  
Date\_ 20120412  
Time\_ 10.09  
INSTRUM av500  
PROBHD 5 mm PABBO BB-  
PULPROG zg30  
TD 32768  
SOLVENT CDCl3  
NS 8  
DS 1  
SWH 10000.000 Hz  
FIDRES 0.305176 Hz  
AQ 1.6385000 sec  
RG 645  
DW 50.000 usec  
DE 6.00 usec  
TE 293.1 K  
D1 2.00000000 sec  
TD0 1

===== CHANNEL f1 =====  
NUC1 1H  
P1 13.50 usec  
PL1 2.20 dB  
SFO1 500.0335010 MHz  
SI 16384  
SF 500.0300064 MHz  
WDW EM  
SSB 0  
LB 0.30 Hz  
GB 0  
PC 2.00

LM-2-14B 13C 1D 2012 04 15

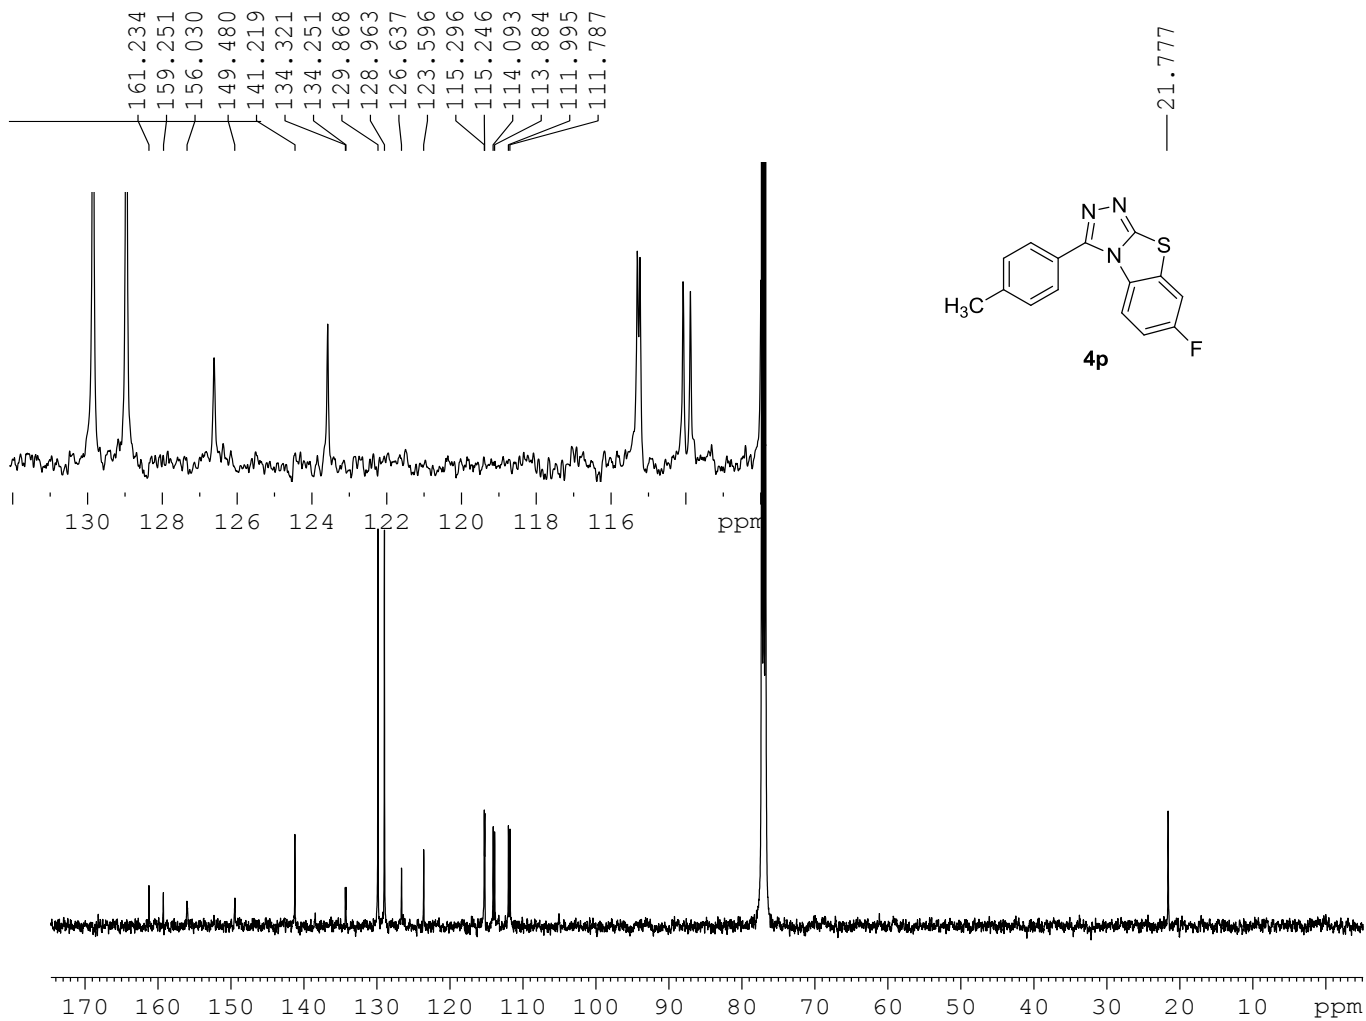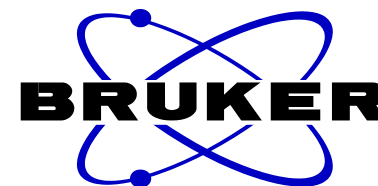

NAME LM-2-14B  
EXPNO 21  
PROCNO 1  
Date\_ 20120415  
Time 13.31  
INSTRUM av500  
PROBHD 5 mm PABBO BB-  
PULPROG zgpg30  
TD 65536  
SOLVENT CDCl3  
NS 1727  
DS 2  
SWH 32679.738 Hz  
FIDRES 0.498653 Hz  
AQ 1.0027661 sec  
RG 812  
DW 15.300 usec  
DE 6.00 usec  
TE 296.2 K  
D1 2.00000000 sec  
d11 0.03000000 sec  
DELTA 1.89999998 sec  
TD0 1

==== CHANNEL f1 =====  
NUC1 13C  
P1 9.60 usec  
PL1 2.00 dB  
SFO1 125.7464750 MHz

==== CHANNEL f2 =====  
CPDPRG2 waltz16  
NUC2 1H  
PCPD2 80.00 usec  
PL2 2.60 dB  
PL12 17.66 dB  
PL13 17.66 dB  
SFO2 500.0355000 MHz  
SI 32768  
SF 125.7326440 MHz  
WDW EM  
SSB 0  
LB 5.00 Hz  
GB 0  
PC 2.00

LSL-2-22b 1H 1D 2013 12 27

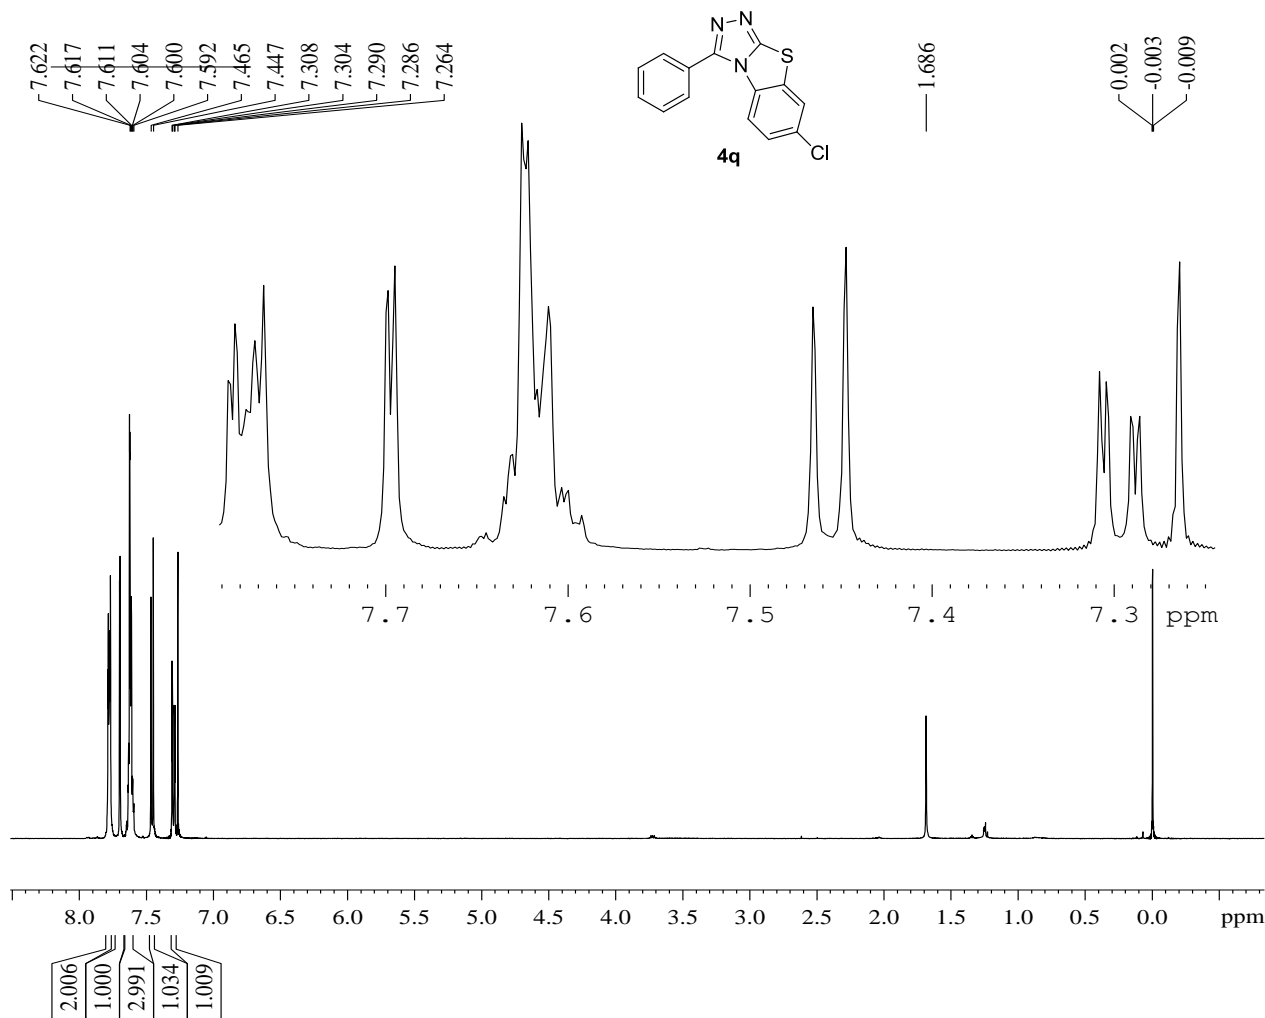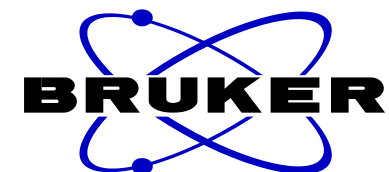

NAME LSL-2-22b  
EXPNO 1  
PROCNO 1  
Date\_ 20131227  
Time 16.14  
INSTRUM spect  
PROBHD 5 mm PABBO BB-  
PULPROG zg30  
TD 16384  
SOLVENT CDCl3  
NS 8  
DS 1  
SWH 10000.000 Hz  
FIDRES 0.610352 Hz  
AQ 0.8193000 sec  
RG 512  
DW 50.000 usec  
DE 8.00 usec  
TE 293.6 K  
D1 1.00000000 sec  
TD0 1

===== CHANNEL f1 =====  
NUC1 1H  
P1 13.00 usec  
PL1 2.00 dB  
SFO1 500.0338500 MHz  
SI 16384  
SF 500.0300087 MHz  
WDW EM  
SSB 0  
LB 0.30 Hz  
GB 0  
PC 4.00

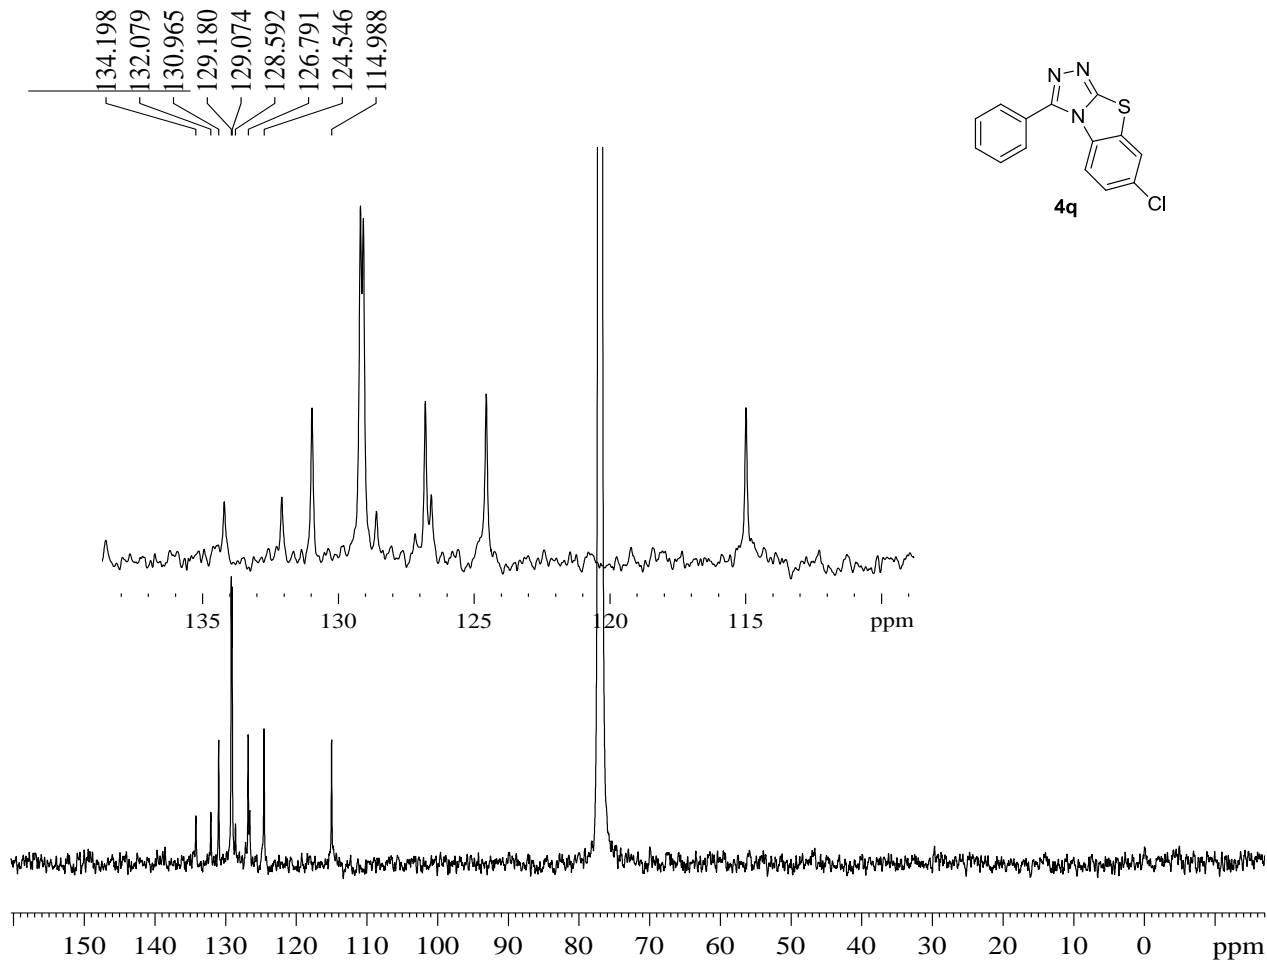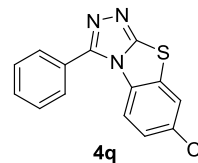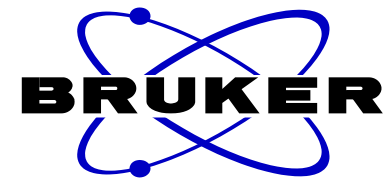

NAME lm-2-22b  
EXPNO 2  
PROCNO 1  
Date\_ 20130620  
Time 15.21  
INSTRUM spect  
PROBHD 5 mm PABBO BB-  
PULPROG zgpg30  
TD 65536  
SOLVENT CDCl3  
NS 2111  
DS 2  
SWH 32679.738 Hz  
FIDRES 0.498653 Hz  
AQ 1.0027661 sec  
RG 5160  
DW 15.300 usec  
DE 6.00 usec  
TE 301.6 K  
D1 2.00000000 sec  
d11 0.03000000 sec  
DELTA 1.89999998 sec  
TD0 20

===== CHANNEL f1 =====  
NUC1 13C  
P1 9.60 usec  
PL1 2.00 dB  
SFO1 125.7464750 MHz

===== CHANNEL f2 =====  
CPDPRG2 waltz16  
NUC2 1H  
PCPD2 80.00 usec  
PL2 2.60 dB  
PL12 17.66 dB  
PL13 17.66 dB  
SFO2 500.0355000 MHz  
SI 32768  
SF 125.7326440 MHz  
WDW EM

lm-2-23b-1 1H 1D 2013 12 31

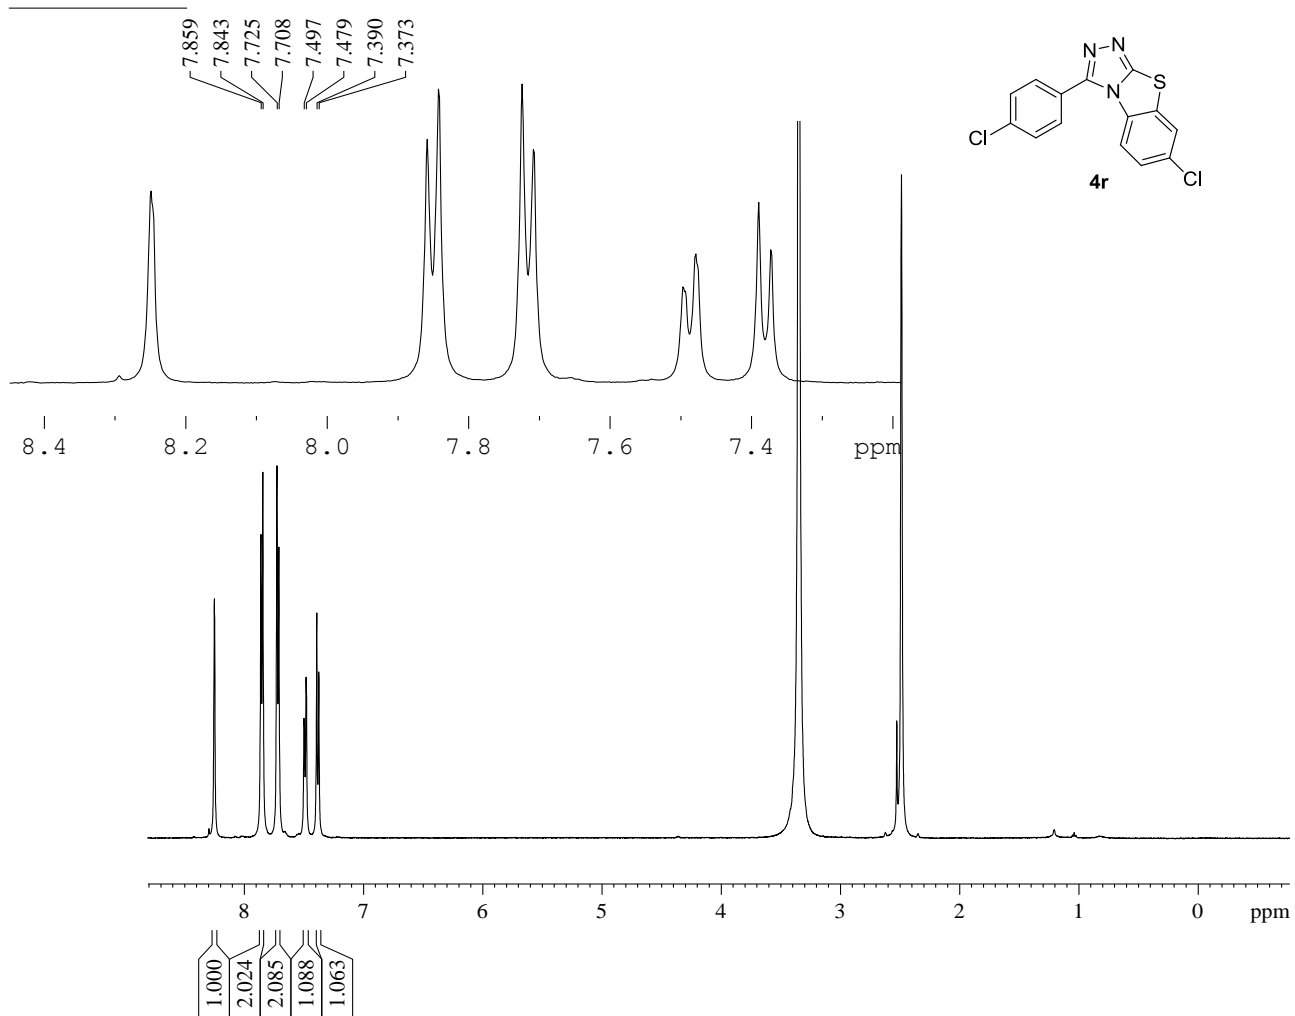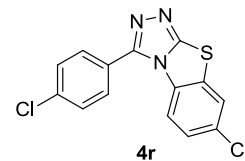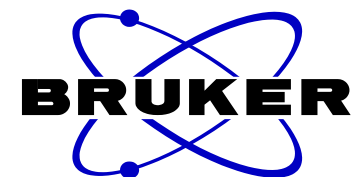

NAME lm-2-23b-1  
EXPNO 1  
PROCNO 1  
Date\_ 20131231  
Time 16.43  
INSTRUM spect  
PROBHD 5 mm PABBO BB-  
PULPROG zg30  
TD 16384  
SOLVENT DMSO  
NS 8  
DS 1  
SWH 10000.000 Hz  
FIDRES 0.610352 Hz  
AQ 0.8193000 sec  
RG 322  
DW 50.000 usec  
DE 8.00 usec  
TE 293.4 K  
D1 1.00000000 sec  
TD0 1

===== CHANNEL f1 =====  
NUC1 1H  
P1 13.00 usec  
PL1 2.00 dB  
SFO1 500.0338500 MHz  
SI 16384  
SF 500.0300085 MHz  
WDW EM  
SSB 0  
LB 0.60 Hz  
GB 0  
PC 4.00

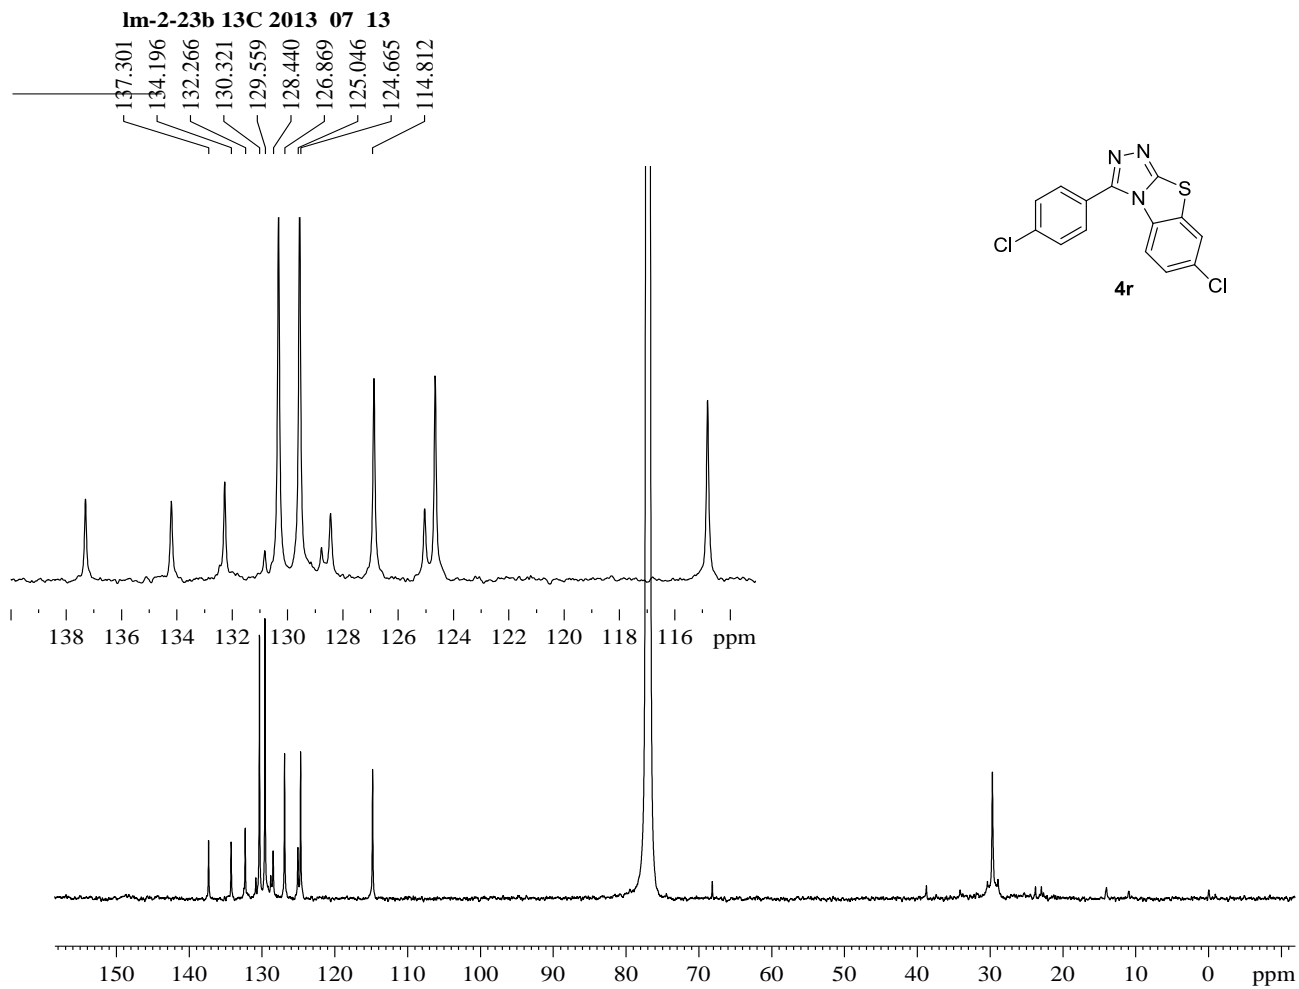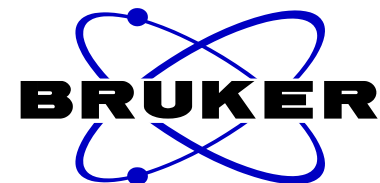

NAME 1m-2-23b  
EXPNO 21  
PROCNO 1  
Date\_ 20130713  
Time 21.06  
INSTRUM spect  
PROBHD 5 mm PABBO BB-  
PULPROG zgpg30  
TD 65536  
SOLVENT CDCl3  
NS 17784  
DS 2  
SWH 32679.738 Hz  
FIDRES 0.498653 Hz  
AQ 1.0027661 sec  
RG 1820  
DW 15.300 usec  
DE 6.00 usec  
TE 673.2 K  
D1 2.0000000 sec  
d11 0.03000000 sec  
DELTA 1.89999998 sec  
TD0 40

===== CHANNEL f1 =====  
NUC1 13C  
P1 12.20 usec  
PL1 3.00 dB  
SFO1 125.7464750 MHz

===== CHANNEL f2 =====  
CPDPRG2 waltz16  
NUC2 1H  
PCPD2 80.00 usec  
PL2 2.00 dB  
PL12 17.70 dB  
PL13 17.70 dB  
SFO2 500.0355000 MHz  
SI 32768  
SF 125.7326466 MHz  
WDW EM



lm-2-24b-1 1H 1D 2013 12 31

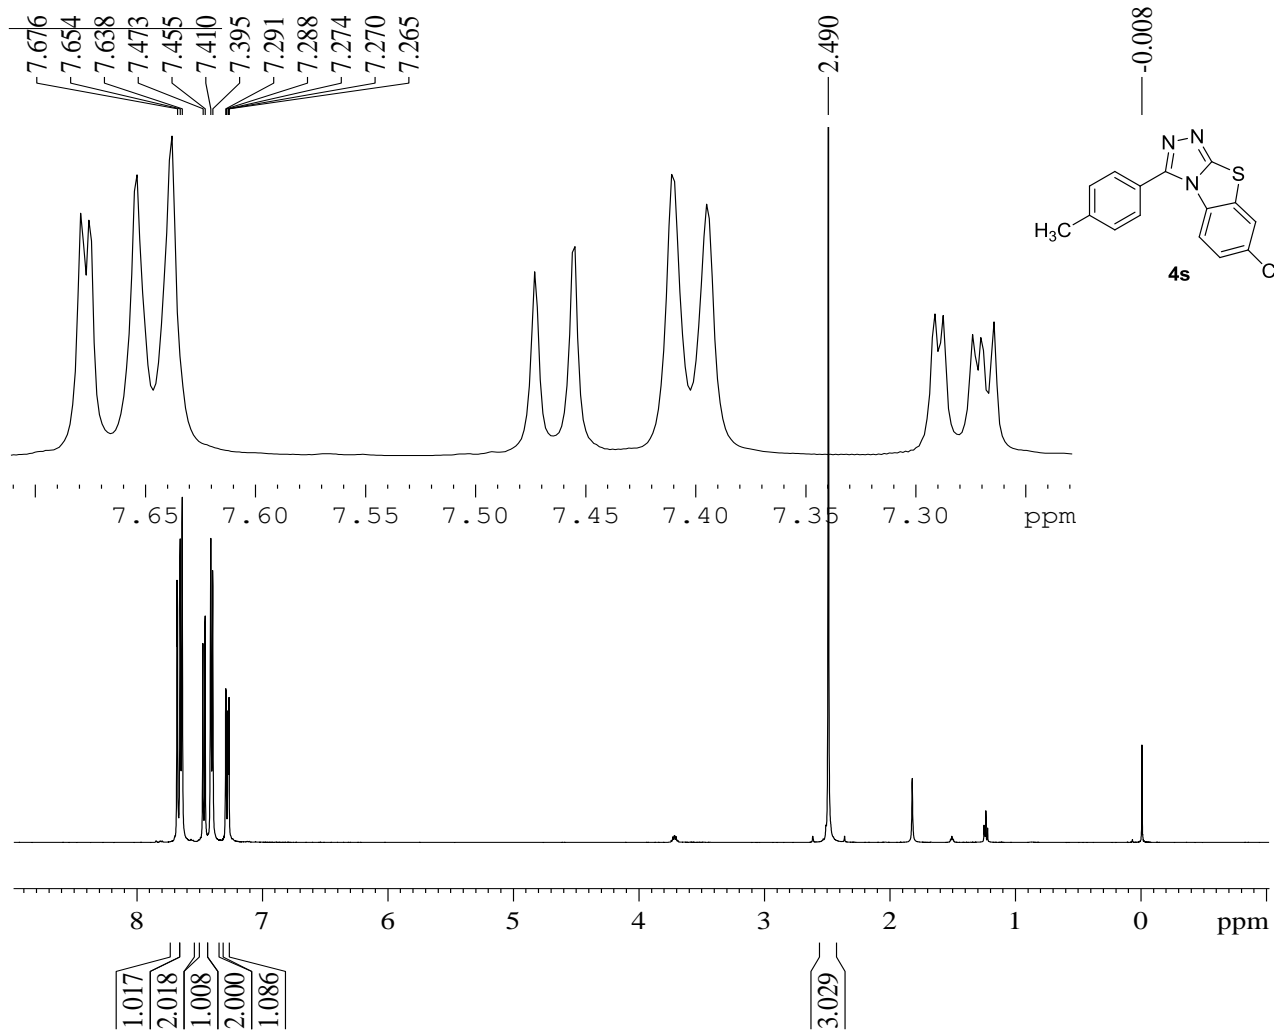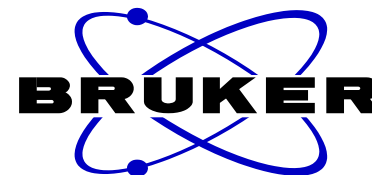

NAME lm-2-24b-1  
EXPNO 1  
PROCNO 1  
Date\_ 20131231  
Time 17.12  
INSTRUM spect  
PROBHD 5 mm PABBO BB-  
PULPROG zg30  
TD 16384  
SOLVENT CDCl3  
NS 8  
DS 1  
SWH 10000.000 Hz  
FIDRES 0.610352 Hz  
AQ 0.8193000 sec  
RG 322  
DW 50.000 usec  
DE 8.00 usec  
TE 293.5 K  
D1 1.00000000 sec  
TD0 1

===== CHANNEL f1 =====  
NUC1 1H  
P1 13.00 usec  
PL1 2.00 dB  
SFO1 500.0338500 MHz  
SI 16384  
SF 500.0300085 MHz  
WDW EM  
SSB 0  
LB 0.60 Hz  
GB 0  
PC 4.00

lm-2-24B-2 13C 2013 12 31

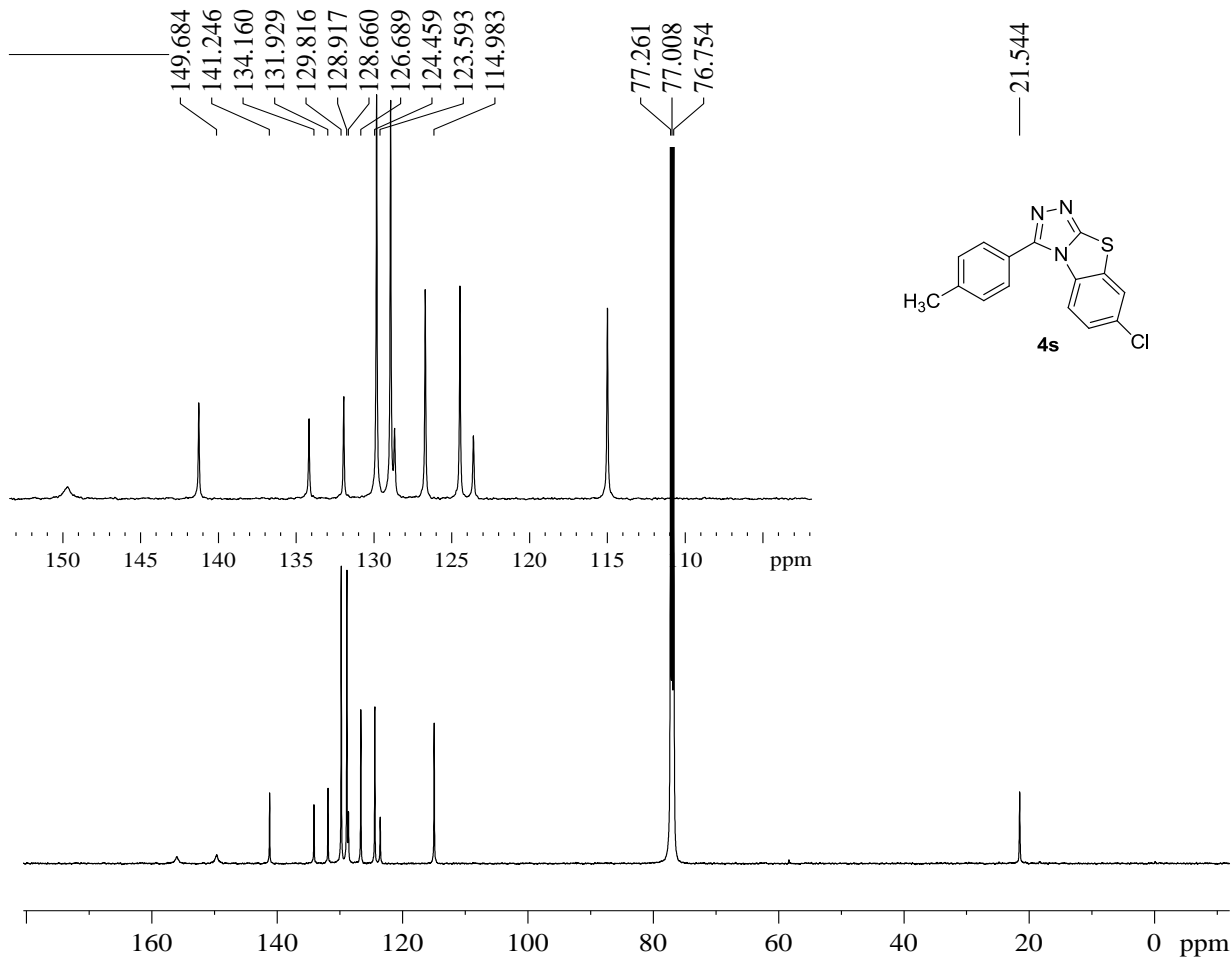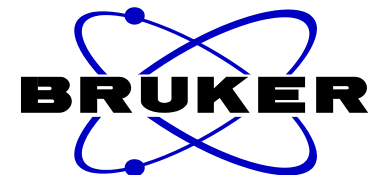

NAME lm-2-24b-2  
 EXPNO 2  
 PROCNO 1  
 Date\_ 20131231  
 Time 18.20  
 INSTRUM spect  
 PROBHD 5 mm PABBO BB-  
 PULPROG zgpg30  
 TD 65536  
 SOLVENT CDCl3  
 NS 16164  
 DS 2  
 SWH 32679.738 Hz  
 FIDRES 0.498653 Hz  
 AQ 1.0027661 sec  
 RG 1820  
 DW 15.300 usec  
 DE 6.00 usec  
 TE 296.6 K  
 D1 2.00000000 sec  
 d11 0.03000000 sec  
 DELTA 1.89999998 sec  
 TD0 40

===== CHANNEL f1 =====  
 NUC1 13C  
 P1 12.20 usec  
 PL1 3.00 dB  
 SFO1 125.7464750 MHz

===== CHANNEL f2 =====  
 CPDPRG2 waltz16  
 NUC2 1H  
 PCPD2 80.00 usec  
 PL2 2.00 dB  
 PL12 17.70 dB  
 PL13 17.70 dB  
 SFO2 500.0355000 MHz  
 SI 32768  
 SF 125.7326472 MHz  
 WDW EM

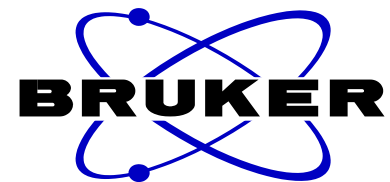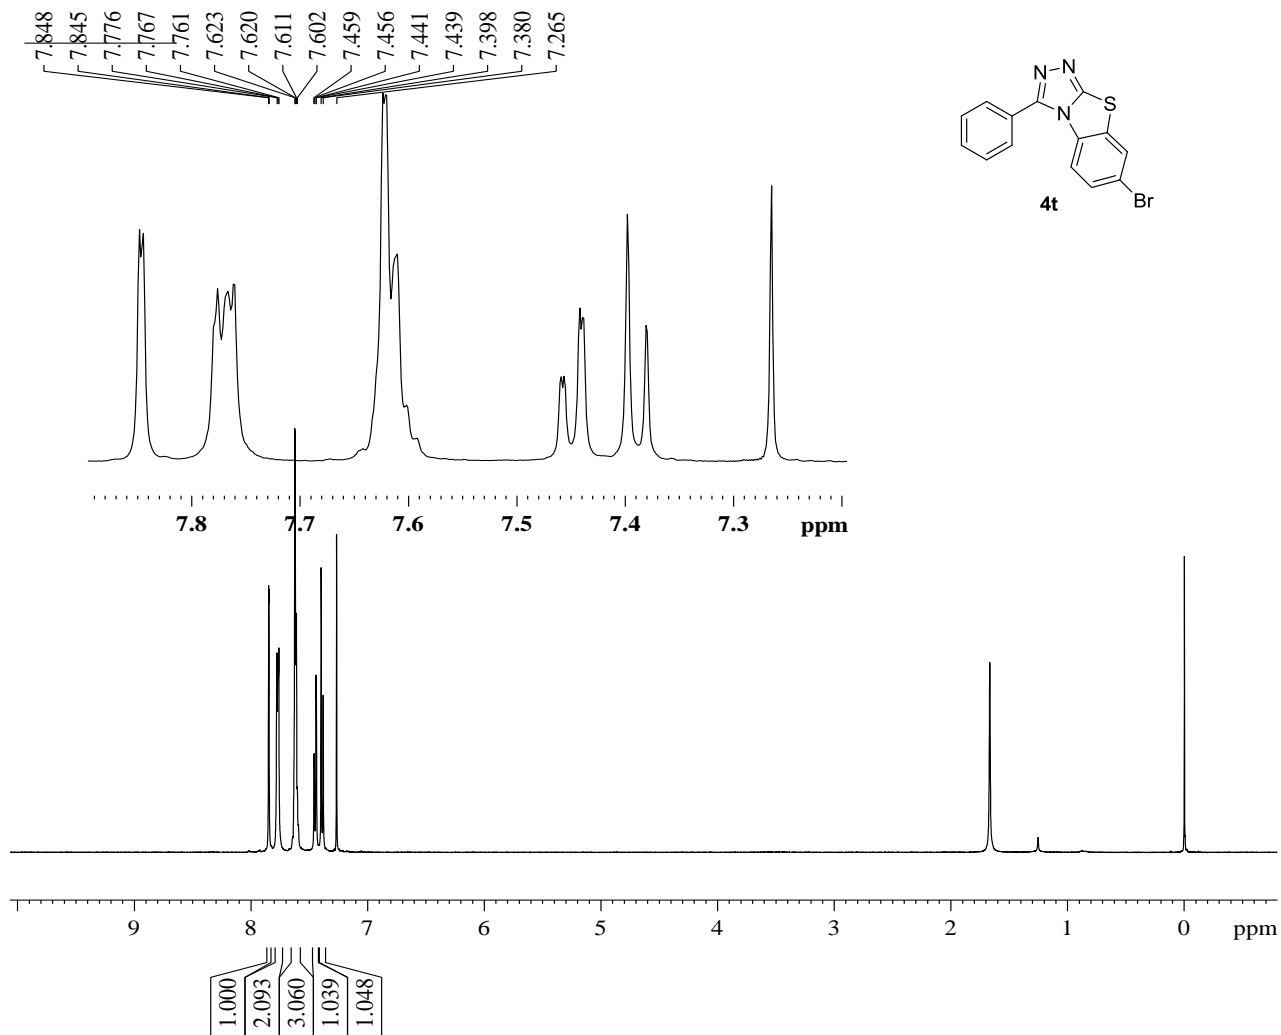

NAME lm-2-25b  
EXPNO 1  
PROCNO 1  
Date\_ 20130618  
Time 15.51  
INSTRUM spect  
PROBHD 5 mm PABBO BB-  
PULPROG zg30  
TD 16384  
SOLVENT CDCl3  
NS 8  
DS 1  
SWH 10000.000 Hz  
FIDRES 0.610352 Hz  
AQ 0.8193000 sec  
RG 724  
DW 50.000 usec  
DE 8.00 usec  
TE 297.8 K  
D1 1.00000000 sec  
TD0 1

===== CHANNEL f1 =====  
NUC1 1H  
P1 13.00 usec  
PL1 2.00 dB  
SFO1 500.0338500 MHz  
SI 16384  
SF 500.0300072 MHz  
WDW EM  
SSB 0  
LB 0.30 Hz  
GB 0  
PC 4.00

lm-2-25b 13C 2013 06 20

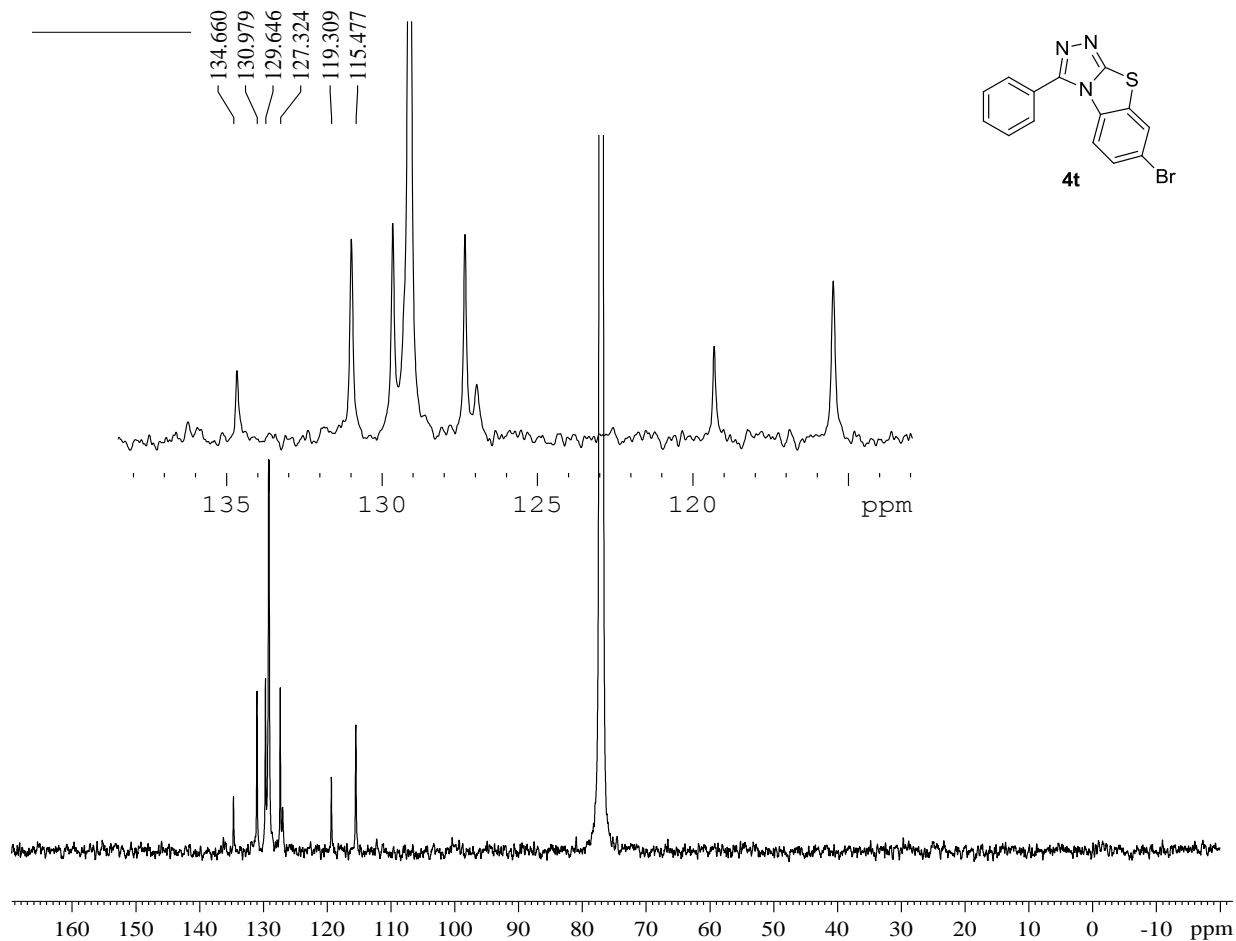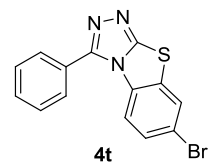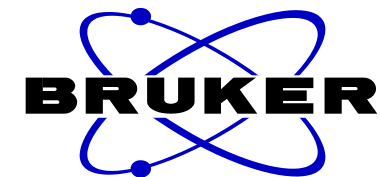

NAME lm-2-25b  
EXPNO 2  
PROCNO 1  
Date\_ 20130620  
Time 17.53  
INSTRUM spect  
PROBHD 5 mm PABBO BB-  
PULPROG zgpg30  
TD 65536  
SOLVENT CDCl3  
NS 1493  
DS 2  
SWH 32679.738 Hz  
FIDRES 0.498653 Hz  
AQ 1.0027661 sec  
RG 5160  
DW 15.300 usec  
DE 6.00 usec  
TE 299.4 K  
D1 2.00000000 sec  
d11 0.03000000 sec  
DELTA 1.89999998 sec  
TD0 40

===== CHANNEL f1 =====

NUC1 13C  
P1 9.60 usec  
PL1 2.00 dB  
SFO1 125.7464750 MHz

===== CHANNEL f2 =====

CPDPRG2 waltz16  
NUC2 1H  
PCPD2 80.00 usec  
PL2 2.60 dB  
PL12 17.66 dB  
PL13 17.66 dB  
SFO2 500.0355000 MHz  
SI 32768  
SF 125.7326472 MHz  
WDW EM

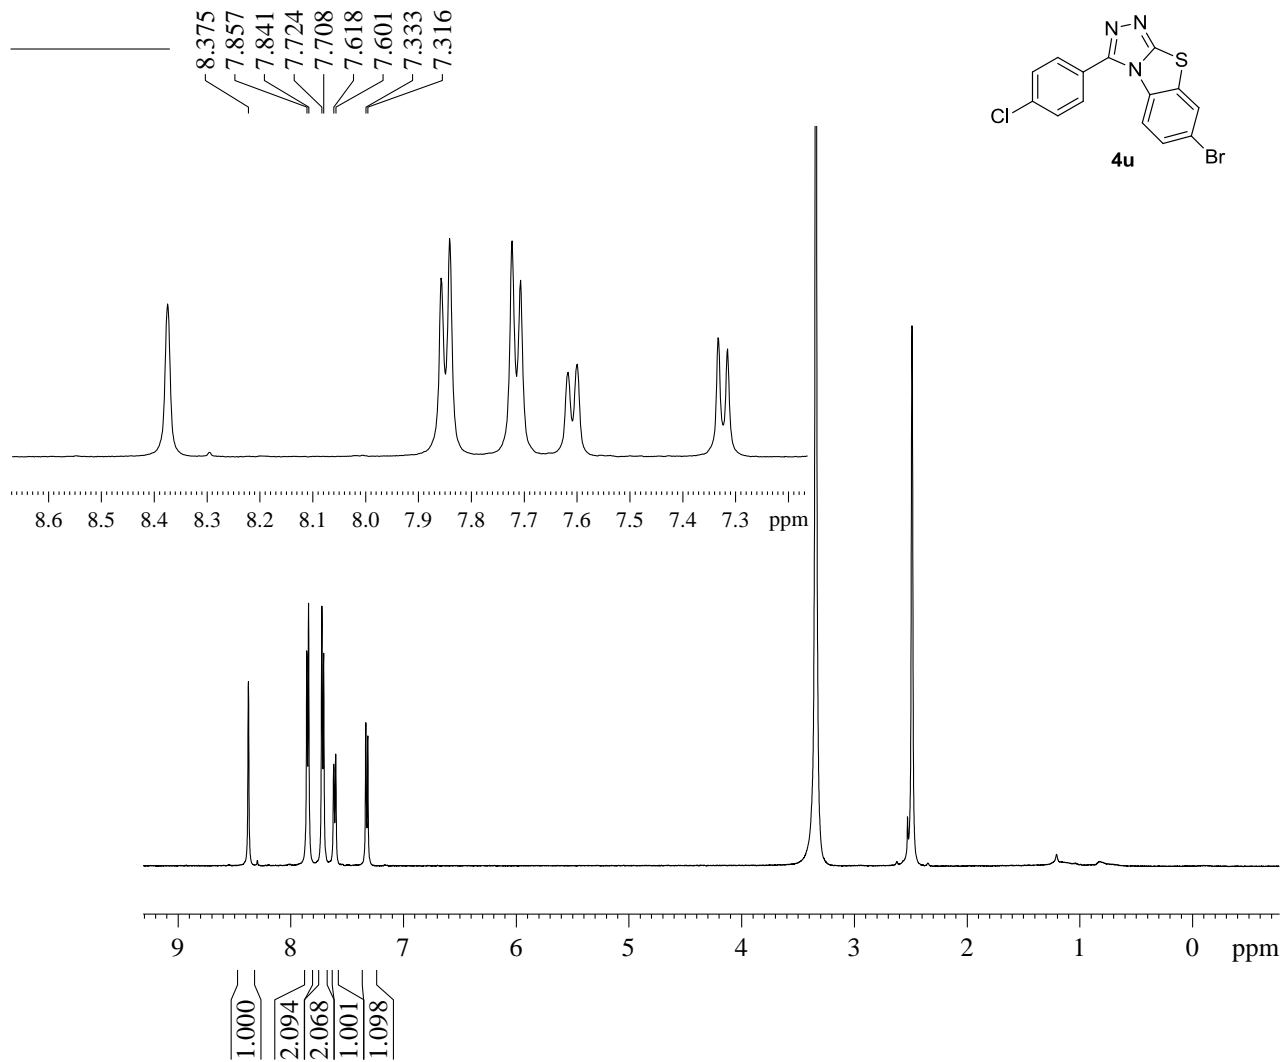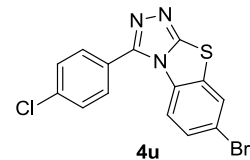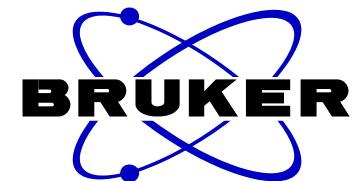

NAME lm-2-26b-1  
 EXPNO 1  
 PROCNO 1  
 Date\_ 20131231  
 Time 17.00  
 INSTRUM spect  
 PROBHD 5 mm PABBO BB-  
 PULPROG zg30  
 TD 16384  
 SOLVENT DMSO  
 NS 8  
 DS 1  
 SWH 10000.000 Hz  
 FIDRES 0.610352 Hz  
 AQ 0.8193000 sec  
 RG 322  
 DW 50.000 usec  
 DE 8.00 usec  
 TE 293.5 K  
 D1 1.00000000 sec  
 TD0 1

===== CHANNEL f1 =====  
 NUC1 1H  
 P1 13.00 usec  
 PL1 2.00 dB  
 SFO1 500.0338500 MHz  
 SI 16384  
 SF 500.0300085 MHz  
 WDW EM  
 SSB 0  
 LB 0.60 Hz  
 GB 0  
 PC 4.00

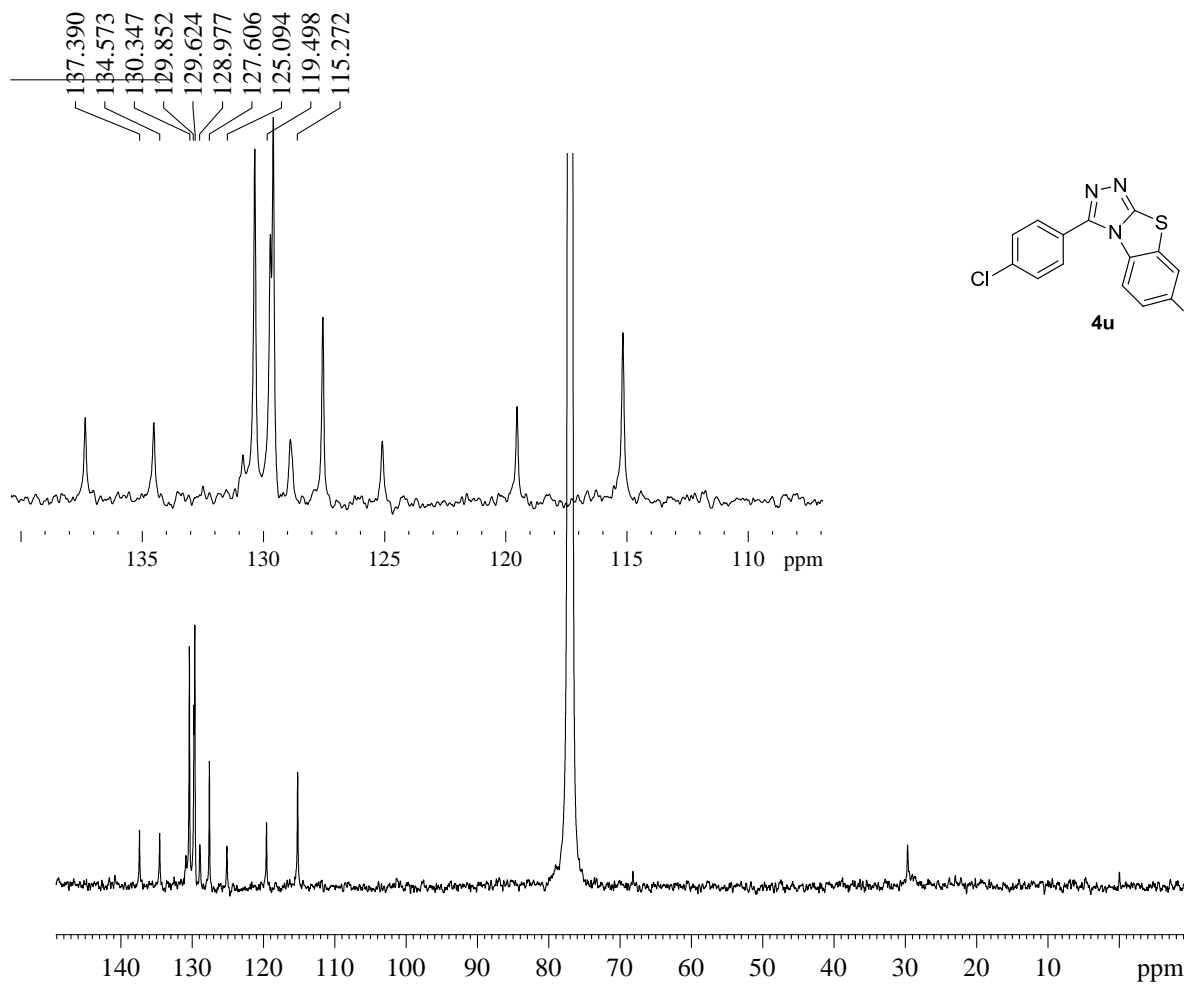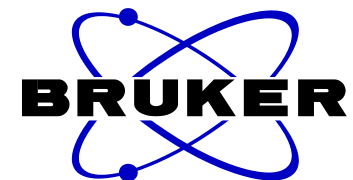

NAME lm-2-26b  
EXPNO 2  
PROCNO 1  
Date\_ 20130623  
Time 22.31  
INSTRUM spect  
PROBHD 5 mm PABBO BB-  
PULPROG zgpg30  
TD 65536  
SOLVENT CDCl3  
NS 11125  
DS 2  
SWH 32679.738 Hz  
FIDRES 0.498653 Hz  
AQ 1.0027661 sec  
RG 5160  
DW 15.300 usec  
DE 6.00 usec  
TE 299.6 K  
D1 2.00000000 sec  
d11 0.03000000 sec  
DELTA 1.89999998 sec  
TD0 40

===== CHANNEL f1 =====  
NUC1 13C  
P1 9.60 usec  
PL1 2.00 dB  
SFO1 125.7464750 MHz

===== CHANNEL f2 =====  
CPDPRG2 waltz16  
NUC2 1H  
PCPD2 80.00 usec  
PL2 2.60 dB  
PL12 17.66 dB  
PL13 17.66 dB  
SFO2 500.0355000 MHz  
SI 32768  
SF 125.7326422 MHz  
WDW EM

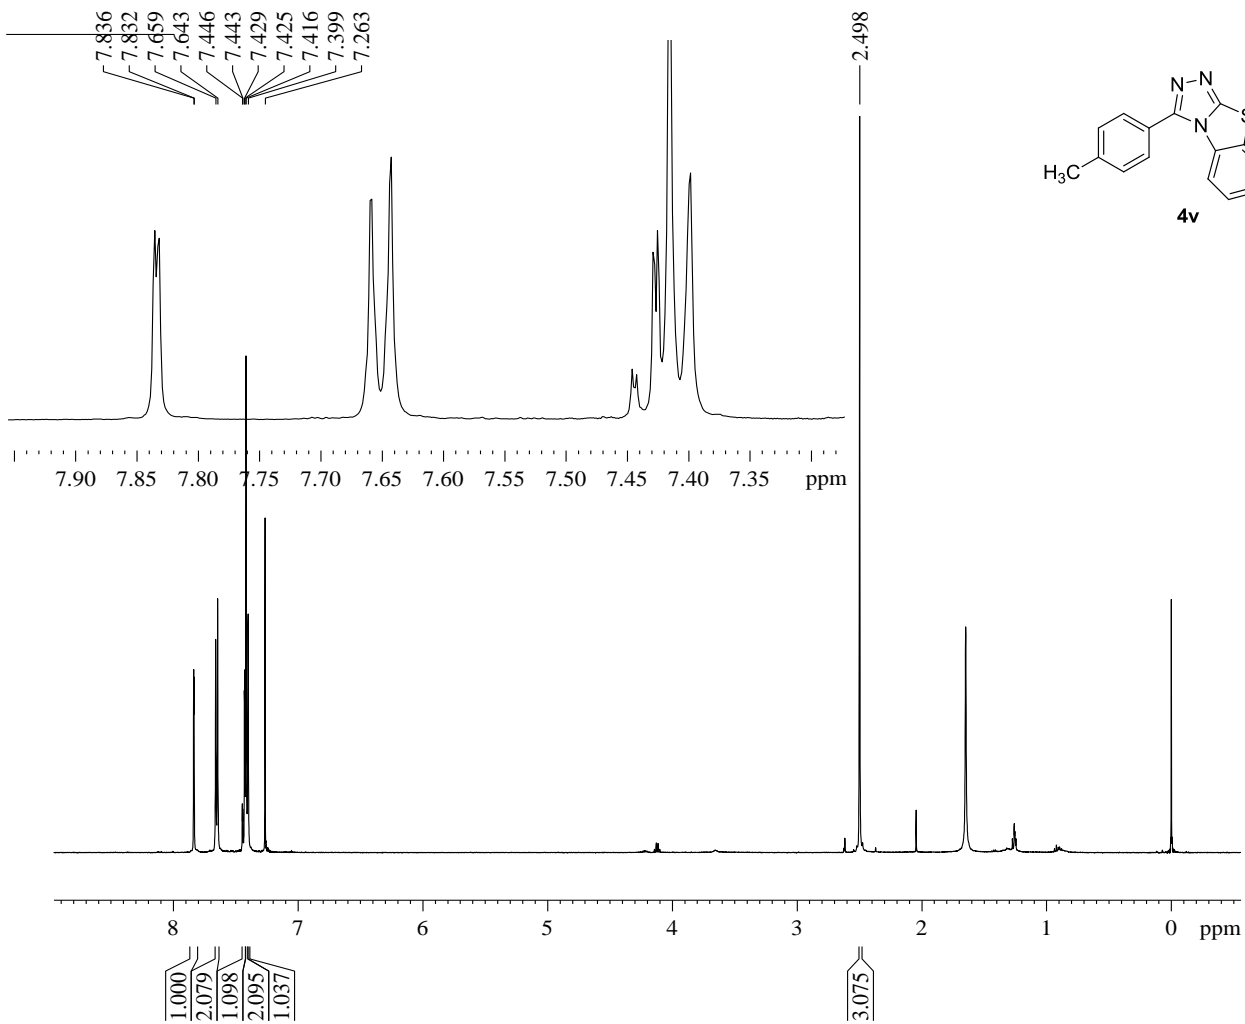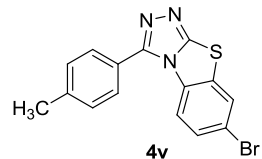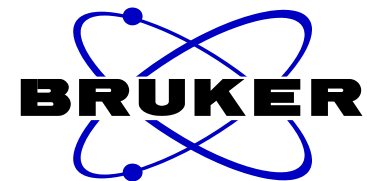

NAME lm-2-27b  
 EXPNO 1  
 PROCNO 1  
 Date\_ 20130702  
 Time 17.19  
 INSTRUM spect  
 PROBHD 5 mm PABBO BB-  
 PULPROG zg30  
 TD 16384  
 SOLVENT CDCl3  
 NS 8  
 DS 1  
 SWH 10000.000 Hz  
 FIDRES 0.610352 Hz  
 AQ 0.8193000 sec  
 RG 724  
 DW 50.000 usec  
 DE 8.00 usec  
 TE 297.9 K  
 D1 1.00000000 sec  
 TD0 1

===== CHANNEL f1 =====  
 NUC1 1H  
 P1 13.00 usec  
 PL1 2.00 dB  
 SFO1 500.0338500 MHz  
 SI 16384  
 SF 500.0300085 MHz  
 WDW EM  
 SSB 0  
 LB 0.30 Hz  
 GB 0  
 PC 2.00

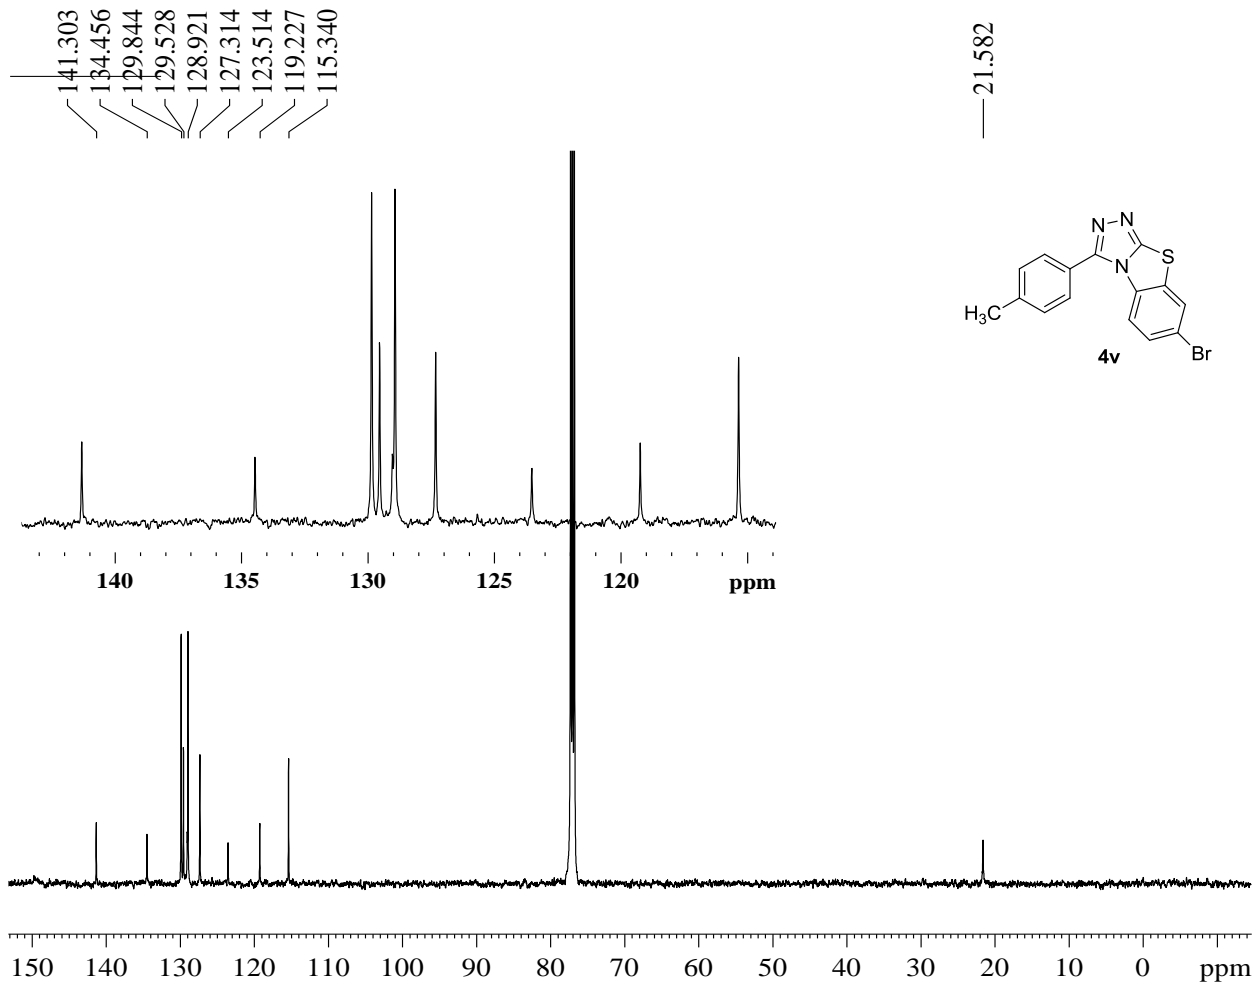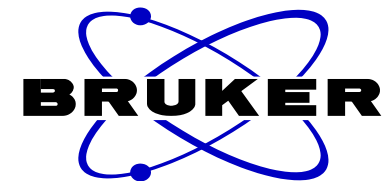

NAME lm-2-27b  
 EXPNO 2  
 PROCNO 1  
 Date\_ 20130705  
 Time 12.18  
 INSTRUM spect  
 PROBHD 5 mm PABBO BB-  
 PULPROG zgpg30  
 TD 65536  
 SOLVENT CDCl3  
 NS 2500  
 DS 2  
 SWH 32679.738 Hz  
 FIDRES 0.498653 Hz  
 AQ 1.0027661 sec  
 RG 1820  
 DW 15.300 usec  
 DE 6.00 usec  
 TE 298.0 K  
 D1 2.00000000 sec  
 d11 0.03000000 sec  
 DELTA 1.89999998 sec  
 TD0 5

===== CHANNEL f1 =====  
 NUC1 13C  
 P1 12.20 usec  
 PL1 3.00 dB  
 SFO1 125.7464750 MHz

===== CHANNEL f2 =====  
 CPDPRG2 waltz16  
 NUC2 1H  
 PCPD2 80.00 usec  
 PL2 2.00 dB  
 PL12 17.70 dB  
 PL13 17.70 dB  
 SFO2 500.0355000 MHz  
 SI 32768  
 SF 125.7326466 MHz  
 WDW EM



LM-2-12B 1H 2012 04 12

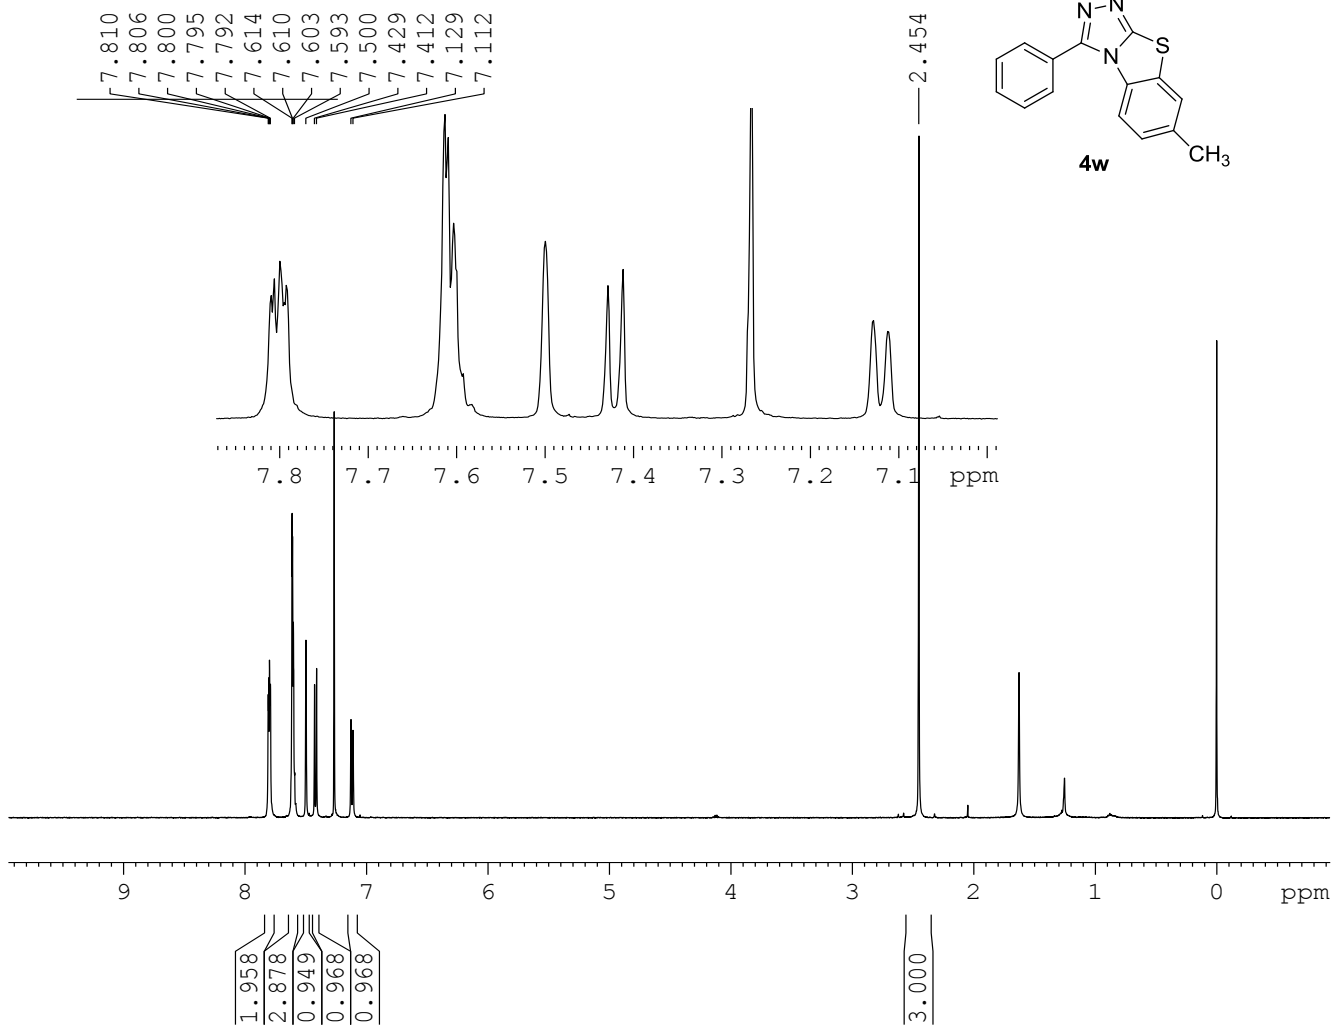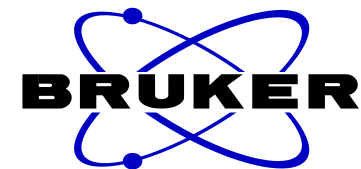

|         |                |
|---------|----------------|
| NAME    | LM-2-12B       |
| EXPNO   | 1              |
| PROCNO  | 1              |
| Date_   | 20120412       |
| Time_   | 9.59           |
| INSTRUM | av500          |
| PROBHD  | 5 mm PABBO BB- |
| PULPROG | zg30           |
| TD      | 32768          |
| SOLVENT | CDCl3          |
| NS      | 8              |
| DS      | 1              |
| SWH     | 10000.000 Hz   |
| FIDRES  | 0.305176 Hz    |
| AQ      | 1.6385000 sec  |
| RG      | 645            |
| DW      | 50.000 usec    |
| DE      | 6.00 usec      |
| TE      | 293.0 K        |
| D1      | 2.00000000 sec |
| TD0     | 1              |

===== CHANNEL f1 =====

|      |                 |
|------|-----------------|
| NUC1 | 1H              |
| P1   | 13.50 usec      |
| PL1  | 2.20 dB         |
| SFO1 | 500.0335010 MHz |
| SI   | 16384           |
| SF   | 500.0300064 MHz |
| WDW  | EM              |
| SSB  | 0               |
| LB   | 0.30 Hz         |
| GB   | 0               |
| PC   | 2.00            |

LM-2-12B

13C 1D 2012 04 12

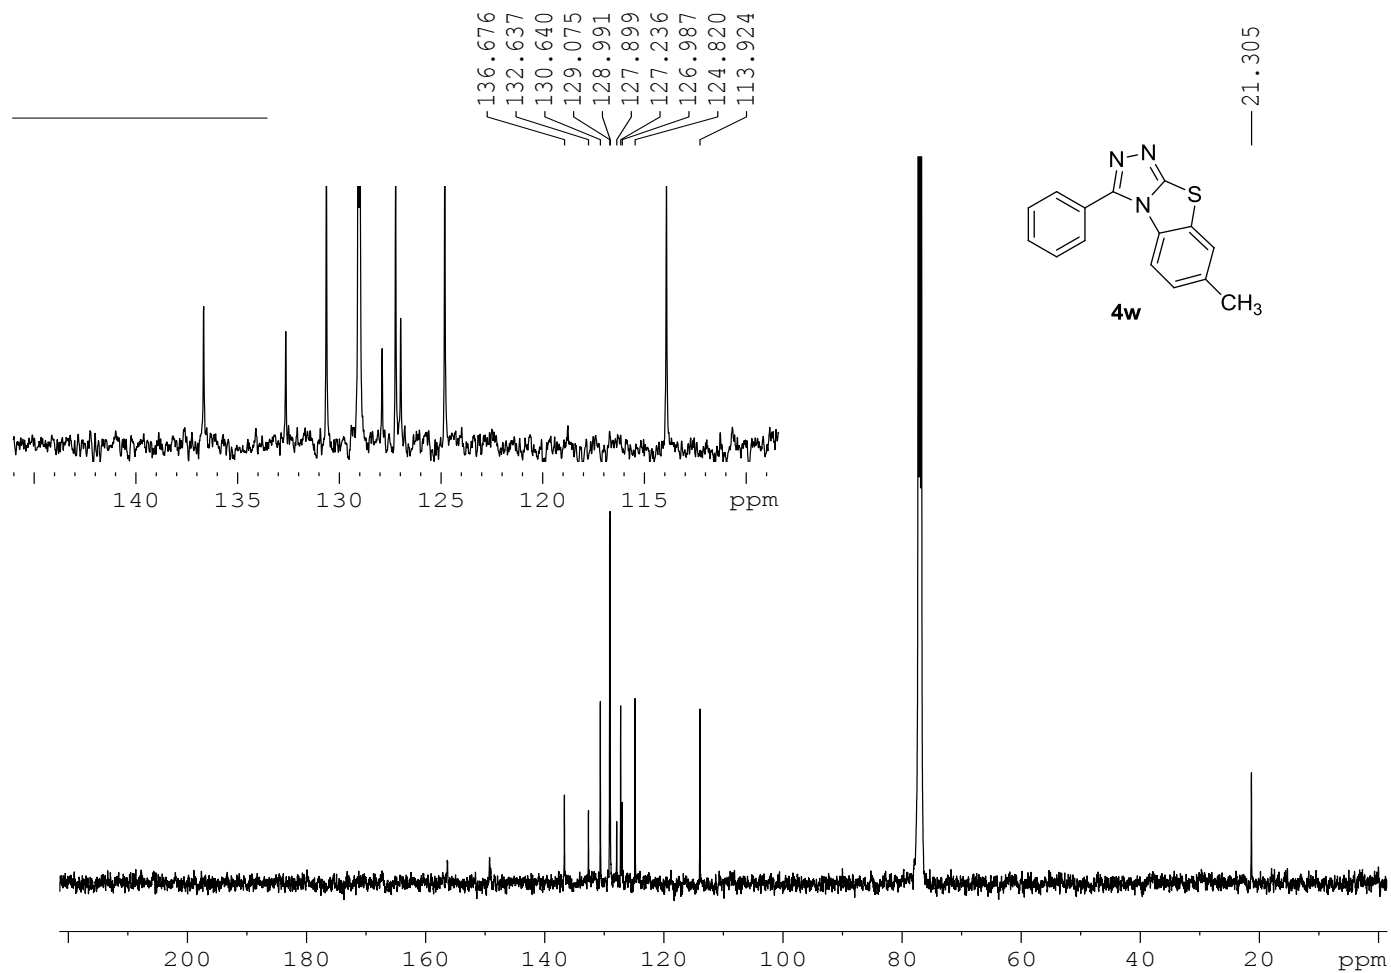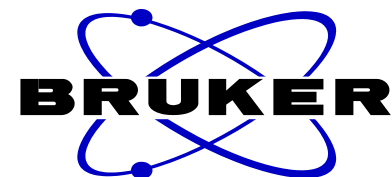

```
NAME LM-2-12B
EXPNO 2
PROCNO 1
Date_ 20120414
Time_ 12.13
INSTRUM av500
PROBHD 5 mm PABBO BB-
PULPROG zgpg30
TD 65536
SOLVENT CDCl3
NS 2707
DS 2
SWH 32679.738 Hz
FIDRES 0.498653 Hz
AQ 1.0027661 sec
RG 812
DW 15.300 usec
DE 6.00 usec
TE 295.9 K
D1 2.00000000 sec
d11 0.03000000 sec
DELTA 1.89999998 sec
TD0 1

===== CHANNEL f1 =====
NUC1 13C
P1 9.60 usec
PL1 2.00 dB
SFO1 125.7464750 MHz

===== CHANNEL f2 =====
CPDPRG2 waltz16
NUC2 1H
PCPD2 80.00 usec
PL2 2.60 dB
PL12 17.66 dB
PL13 17.66 dB
SFO2 500.0355000 MHz
SI 32768
SF 125.7326482 MHz
WDW EM
SSB 0
LB 5.00 Hz
GB 0
PC 2.00
```

LM-2-20B 1H 2012 04 17

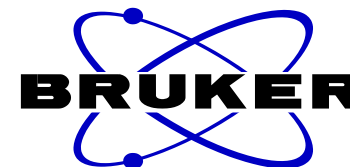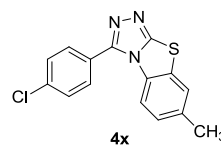

7.755  
7.739  
7.596  
7.580  
7.508  
7.400  
7.383  
7.149  
7.132

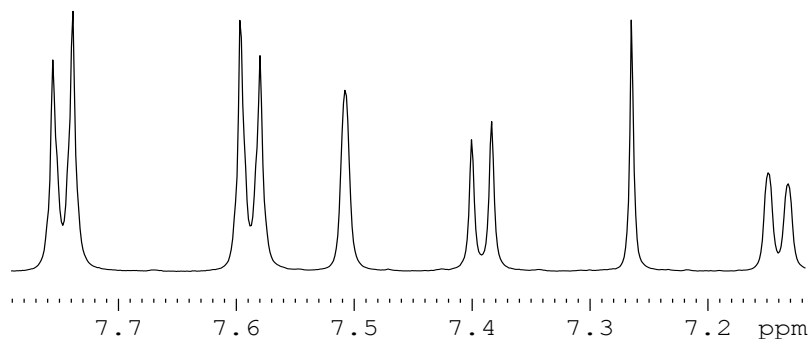

NAME LM-2-20B  
EXPNO 1  
PROCNO 1  
Date\_ 20120417  
Time\_ 16.56  
INSTRUM av500  
PROBHD 5 mm PABBO BB-  
PULPROG zg30  
TD 32768  
SOLVENT CDCl3  
NS 8  
DS 1  
SWH 10000.000 Hz  
FIDRES 0.305176 Hz  
AQ 1.6385000 sec  
RG 645  
DW 50.000 usec  
DE 6.00 usec  
TE 294.6 K  
D1 2.00000000 sec  
TD0 1

===== CHANNEL f1 =====  
NUC1 1H  
P1 13.50 usec  
PL1 2.20 dB  
SFO1 500.0335010 MHz  
SI 16384  
SF 500.0300078 MHz  
WDW EM  
SSB 0  
LB 0.30 Hz  
GB 0  
PC 2.00

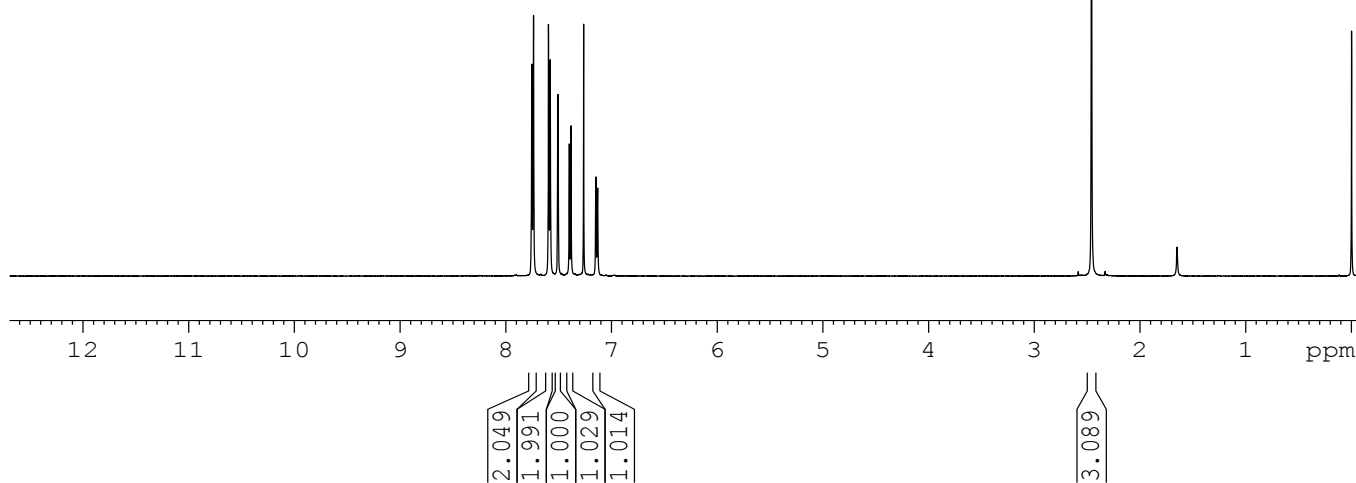

LM-2-20B 13C 1D 2012 04 19

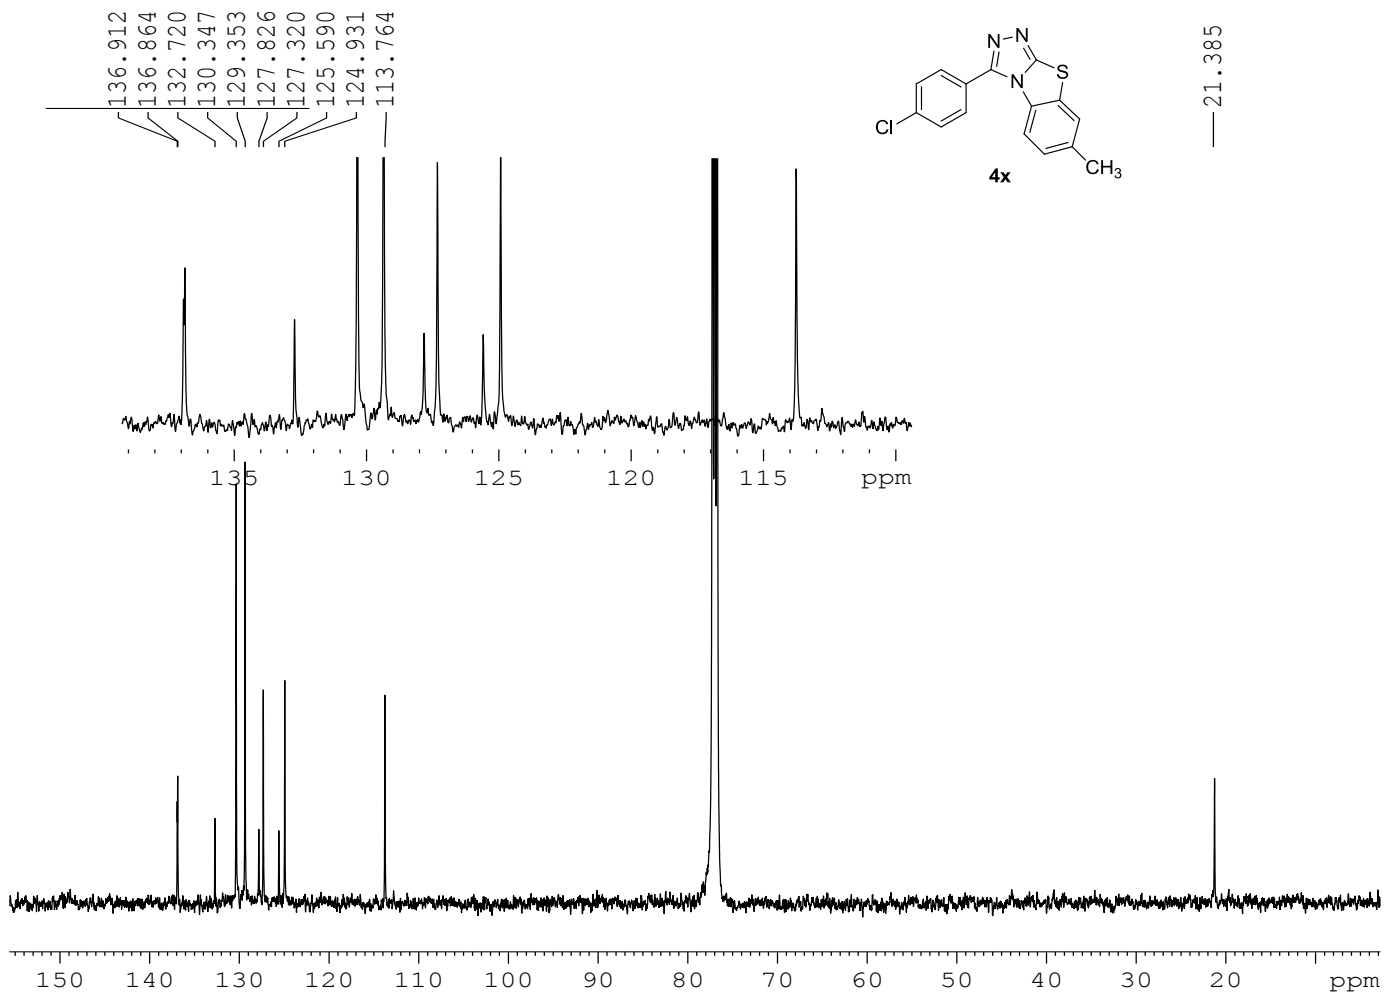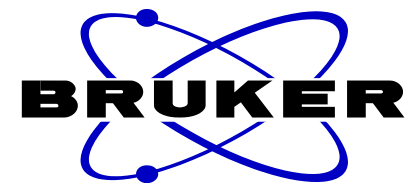

NAME LM-2-20B  
EXPNO 2  
PROCNO 1  
Date\_ 20120419  
Time\_ 13.48  
INSTRUM av500  
PROBHD 5 mm PABBO BB-  
PULPROG zgpg30  
TD 65536  
SOLVENT CDCl3  
NS 2000  
DS 2  
SWH 32679.738 Hz  
FIDRES 0.498653 Hz  
AQ 1.0027661 sec  
RG 812  
DW 15.300 usec  
DE 6.00 usec  
TE 298.7 K  
D1 2.00000000 sec  
d11 0.03000000 sec  
DELTA 1.89999998 sec  
TD0 1

==== CHANNEL f1 =====  
NUC1 13C  
P1 9.60 usec  
PL1 2.00 dB  
SFO1 125.7464750 MHz

==== CHANNEL f2 =====  
CPDPRG2 waltz16  
NUC2 1H  
PCPD2 80.00 usec  
PL2 2.60 dB  
PL12 17.66 dB  
PL13 17.66 dB  
SFO2 500.0355000 MHz  
SI 32768  
SF 125.7326482 MHz  
WDW EM  
SSB 0  
LB 5.00 Hz  
GB 0  
PC 2.00

LM-2-21B 1H 2012 04 17

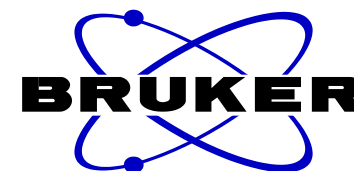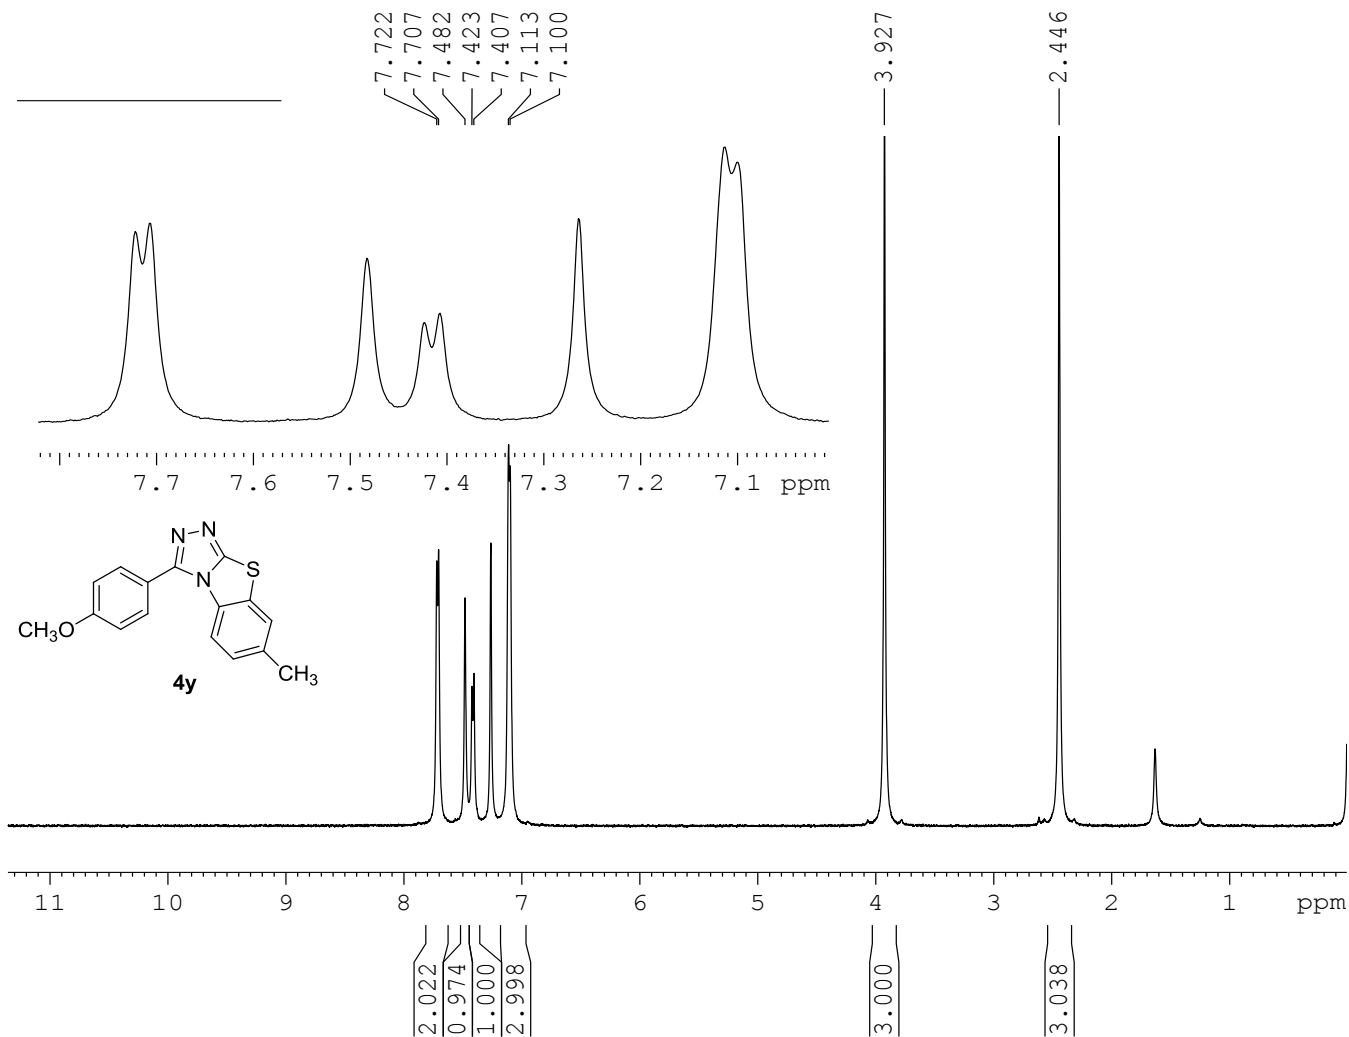

NAME LM-2-21B  
EXPNO 1  
PROCNO 1  
Date\_ 20120417  
Time\_ 17.01  
INSTRUM av500  
PROBHD 5 mm PABBO BB-  
PULPROG zg30  
TD 32768  
SOLVENT CDC13  
NS 8  
DS 1  
SWH 10000.000 Hz  
FIDRES 0.305176 Hz  
AQ 1.6385000 sec  
RG 645  
DW 50.000 usec  
DE 6.00 usec  
TE 294.5 K  
D1 2.00000000 sec  
TD0 1

===== CHANNEL f1 =====  
NUC1 1H  
P1 13.50 usec  
PL1 2.20 dB  
SFO1 500.0335010 MHz  
SI 16384  
SF 500.0300069 MHz  
WDW EM  
SSB 0  
LB 0.30 Hz  
GB 0  
PC 2.00

LM-2-21B

13C 1D 2012 04 20

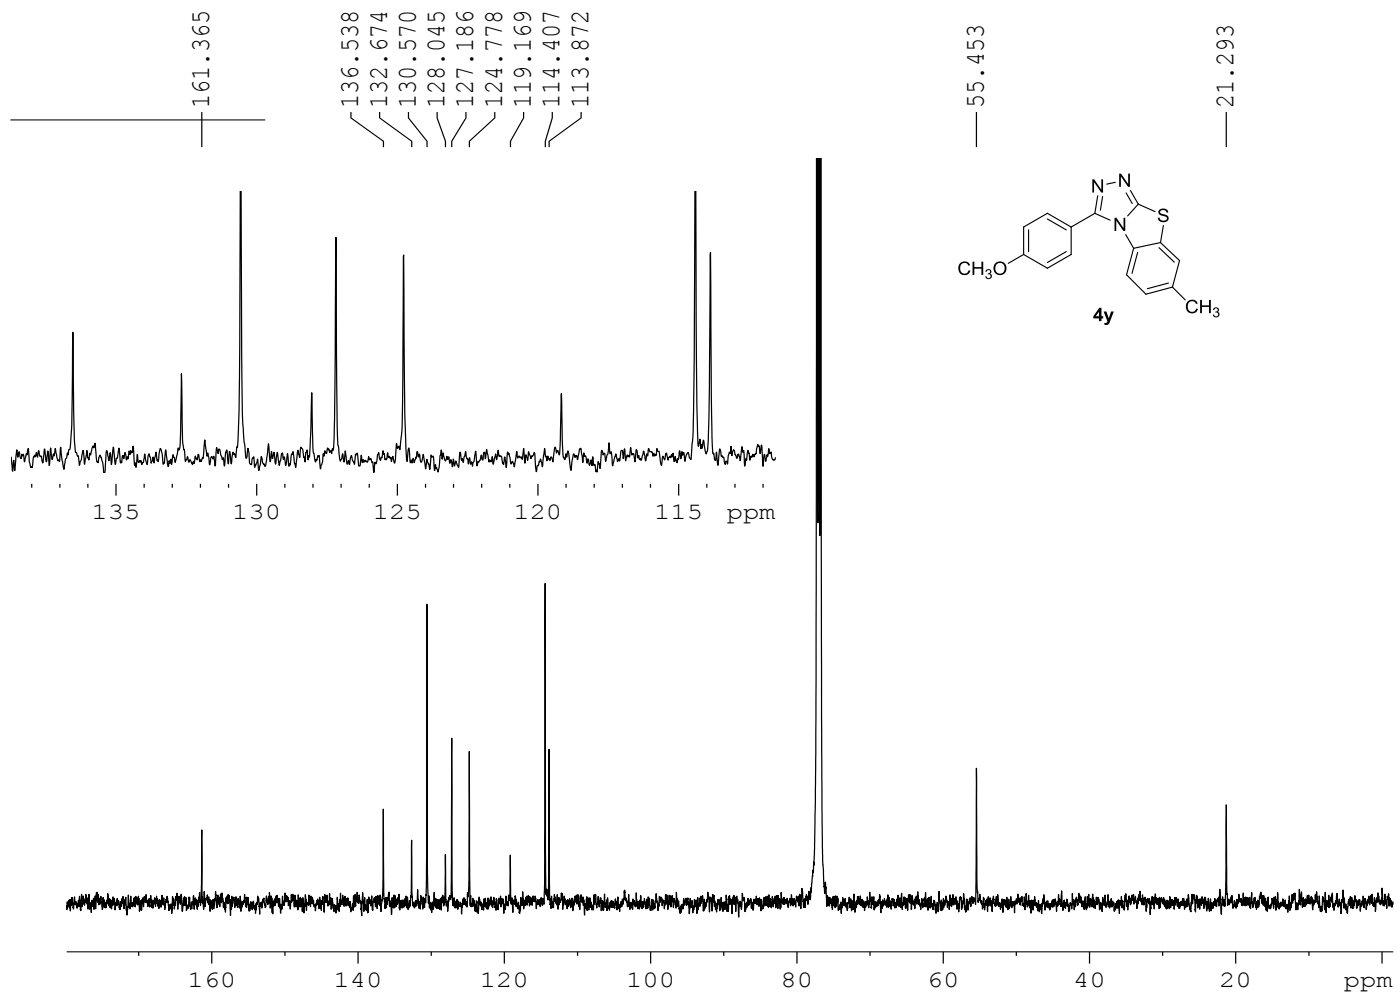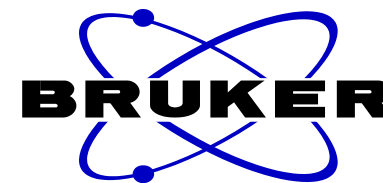

NAME LM-2-21B  
EXPNO 2  
PROCNO 1  
Date\_ 20120420  
Time\_ 10.14  
INSTRUM av500  
PROBHD 5 mm PABBO BB-  
PULPROG zgpg30  
TD 65536  
SOLVENT CDCl3  
NS 2000  
DS 2  
SWH 32679.738 Hz  
FIDRES 0.498653 Hz  
AQ 1.0027661 sec  
RG 812  
DW 15.300 usec  
DE 6.00 usec  
TE 295.6 K  
D1 2.0000000 sec  
d11 0.0300000 sec  
DELTA 1.89999998 sec  
TD0 1

==== CHANNEL f1 =====  
NUC1 13C  
P1 9.60 usec  
PL1 2.00 dB  
SFO1 125.7464750 MHz

==== CHANNEL f2 =====  
CPDPRG2 waltz16  
NUC2 1H  
PCPD2 80.00 usec  
PL2 2.60 dB  
PL12 17.66 dB  
PL13 17.66 dB  
SFO2 500.0355000 MHz  
SI 32768  
SF 125.7326482 MHz  
WDW EM  
SSB 0  
LB 5.00 Hz  
GB 0  
PC 2.00

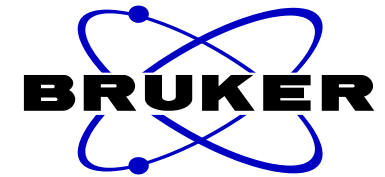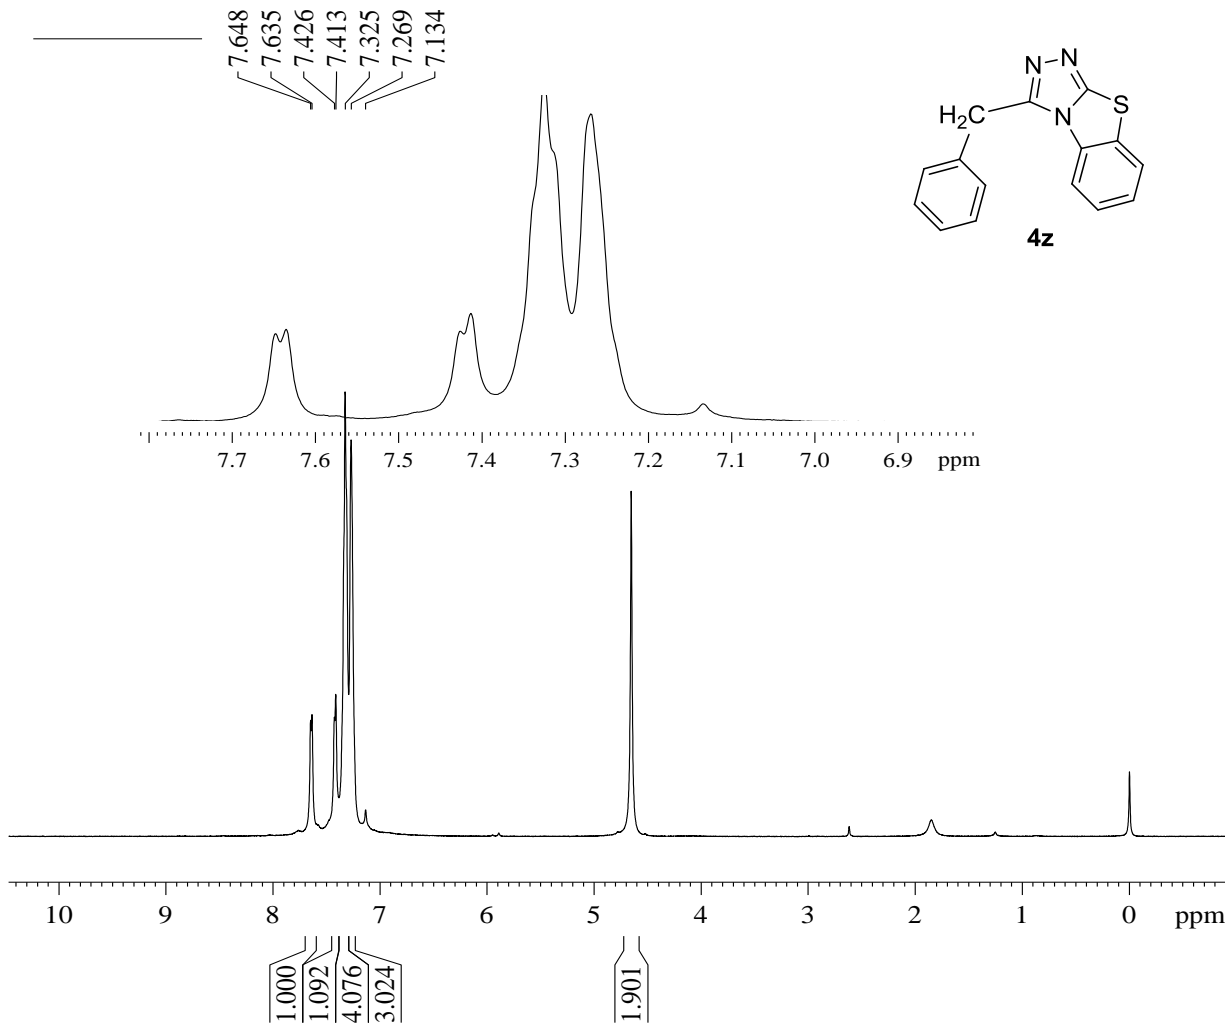

NAME LM-2-9B  
EXPNO 1  
PROCNO 1  
Date\_ 20120327  
Time 16.47  
INSTRUM av500  
PROBHD 5 mm PABBO BB-  
PULPROG zg30  
TD 32768  
SOLVENT CDCl3  
NS 8  
DS 1  
SWH 10000.000 Hz  
FIDRES 0.305176 Hz  
AQ 1.6385000 sec  
RG 287  
DW 50.000 usec  
DE 6.00 usec  
TE 293.9 K  
D1 2.00000000 sec  
TD0 1

===== CHANNEL f1 =====  
NUC1 1H  
P1 13.50 usec  
PL1 2.20 dB  
SFO1 500.0335010 MHz  
SI 16384  
SF 500.0300051 MHz  
WDW EM  
SSB 0  
LB 0.30 Hz  
GB 0  
PC 5.00

LM-2-9B 13C 1D 2012 04 06

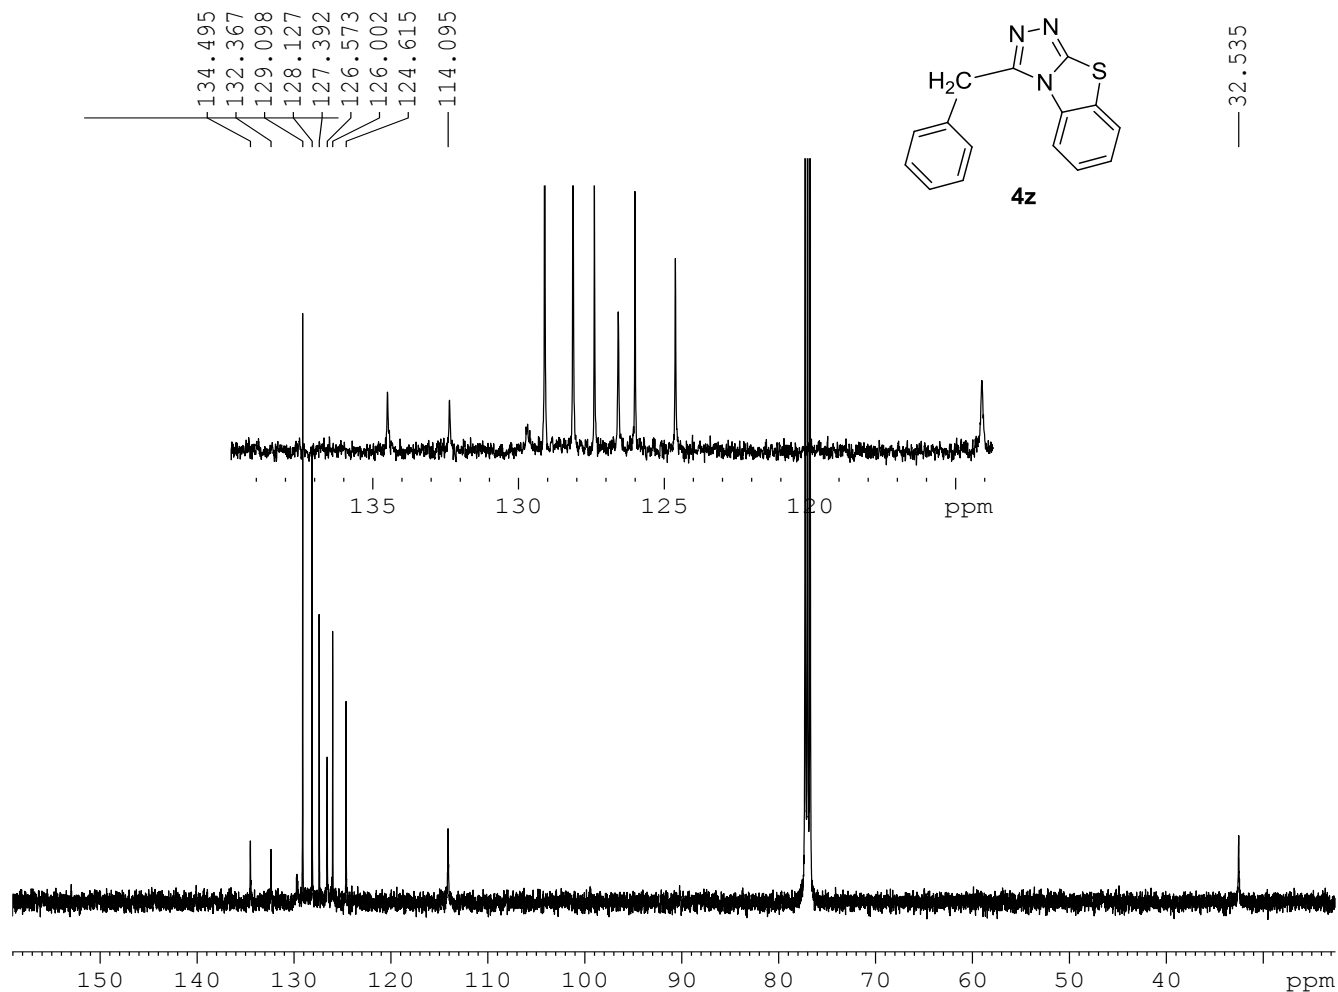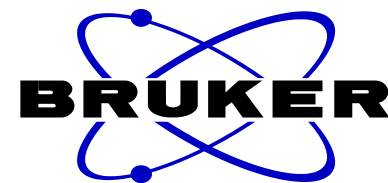

NAME LM-2-9B  
EXPNO 2  
PROCNO 1  
Date\_ 20120406  
Time\_ 13.38  
INSTRUM av500  
PROBHD 5 mm PABBO BB-  
PULPROG zgpg30  
TD 65536  
SOLVENT CDCl3  
NS 1200  
DS 2  
SWH 32679.738 Hz  
FIDRES 0.498653 Hz  
AQ 1.0027661 sec  
RG 4100  
DW 15.300 usec  
DE 6.00 usec  
TE 295.1 K  
D1 2.0000000 sec  
d11 0.0300000 sec  
DELTA 1.89999998 sec  
TDO 1

==== CHANNEL f1 =====  
NUC1 13C  
P1 9.60 usec  
PL1 2.00 dB  
SFO1 125.7464750 MHz

==== CHANNEL f2 =====  
CPDPRG2 waltz16  
NUC2 1H  
PCPD2 80.00 usec  
PL2 2.60 dB  
PL12 17.66 dB  
PL13 17.66 dB  
SFO2 500.0355000 MHz  
SI 32768  
SF 125.7326513 MHz  
WDW EM  
SSB 0  
LB 1.00 Hz  
GB 0  
PC 2.00
